# Supplementary material for: Catalytic dehydrocoupling of methylamine borane using Yamashita's [Ir(PBP)] boryl complex – characterisation of a novel highly fluxional Ir tetrahydride
Source: Royal Society of Chemistry journal article supplement (doi:10.1039/d2nj04914g), 2022-01-01
Supplement: d2nj04914g2.pdf [file d2nj04914g2.pdf]

Supporting Information

**Catalytic dehydrocoupling of methylamine borane using Yamashita's [Ir(PBP)]  
boryl complex - characterisation of a novel highly fluxional Ir tetrahydride**

David Decker<sup>1</sup>, Hans-Joachim Drexler<sup>1</sup>, Wolfgang Baumann<sup>1</sup>, Fabian Reiß<sup>1</sup>, Torsten  
Beweries<sup>1</sup>

<sup>1</sup>Leibniz-Institut für Katalyse e.V. (LIKAT), Albert-Einstein-Str. 29a, 18059 Rostock, Germany.

**Table of Contents**

|          |                                                                                                    |           |
|----------|----------------------------------------------------------------------------------------------------|-----------|
| <b>1</b> | <b>Experimental Section</b>                                                                        | <b>3</b>  |
| <b>2</b> | <b>Crystallographic Details</b>                                                                    | <b>5</b>  |
| <b>3</b> | <b>Preparation of complexes</b>                                                                    | <b>7</b>  |
| 3.1      | Synthesis of [( <sup>t</sup> BuPBP)Ir(H) <sub>2</sub> (CO)] (2)                                    | 7         |
| 3.2      | Synthesis of [( <sup>t</sup> BuPBP)Ir(CO)] (3)                                                     | 10        |
| 3.3      | Stoichiometric reaction of complex 1 with H <sub>3</sub> B·NMeH <sub>2</sub>                       | 13        |
| 3.4      | Deuteration experiments – Reaction of complex 1 with D <sub>3</sub> B·NMeH <sub>2</sub> and NaOtBu | 19        |
| 3.5      | Deuteration experiments – Reaction of 4 with D <sub>2</sub>                                        | 21        |
| 3.6      | Reaction of complex 1 with LiTMP and H <sub>2</sub>                                                | 24        |
| 3.7      | Reaction of 1 (5 mol%) with H <sub>3</sub> B·NMeH <sub>2</sub>                                     | 26        |
| <b>4</b> | <b>Dehydrocoupling of amine boranes</b>                                                            | <b>27</b> |
| 4.1      | General procedure                                                                                  | 27        |
| 4.2      | Overview of the catalytic conditions                                                               | 27        |
| 4.3      | Dehydrocoupling of H <sub>3</sub> B·NMeH <sub>2</sub>                                              | 28        |
| 4.4      | Reactivity test of 2 for the dehydrocoupling of H <sub>3</sub> B·NMeH <sub>2</sub>                 | 33        |
| 4.5      | Dehydrocoupling of H <sub>3</sub> B·NH <sub>3</sub>                                                | 35        |
| <b>5</b> | <b>Computational Details</b>                                                                       | <b>38</b> |
| 5.1      | IR spectra of [( <sup>t</sup> BuPBP)Ir(H) <sub>2</sub> (CO)] (2)                                   | 40        |
| 5.2      | Calculated IR spectra of [( <sup>t</sup> BuPBP)Ir(CO)] (3)                                         | 41        |
| 5.3      | Calculated UV/VIS spectra of [( <sup>t</sup> BuPBP)Ir(H) <sub>2</sub> (CO)] (2)                    | 42        |

|          |                                                                                           |           |
|----------|-------------------------------------------------------------------------------------------|-----------|
| 5.4      | Calculated UV/VIS spectra of $t^{\text{Bu}}\text{PBPIr}(\text{CO})$ (3) .....             | 42        |
| 5.5      | Charge density difference .....                                                           | 44        |
| 5.6      | Theoretical investigation of $[(t^{\text{Bu}}\text{PBP})\text{Ir}(\text{H})_4]$ (4) ..... | 45        |
| <b>6</b> | <b>Literature .....</b>                                                                   | <b>52</b> |

# 1 Experimental Section

## General Information

All experiments, unless otherwise stated, were performed under oxygen- and moisture-free conditions under an inert atmosphere of argon using standard Schlenk or glove box techniques. All glassware was heated three times *in vacuo* using a heat gun and cooled under argon atmosphere. Solvents and reactants were either obtained from commercial sources (table 1.) THF, dichloromethane, toluene, *n*-hexane, *n*-pentane, diethylether and benzene were dispensed from a solvent purification system (SPS) (PureSolv, Innovative Technology) into thick-walled glass Schlenk bombs equipped with Young-type Teflon valve stopcocks, cannula transferred onto activated molecular sieves (3 Å, 0.3 nm, Carl Roth) and stored under argon in a conventional Schlenk flask. Complex <sup>t</sup>BuPBPIr(H)Cl (**1**) was synthesised following literature procedures.<sup>1</sup>

**Table S 1.** Origin and purification of solvents and reactants.

| Substance                       | Origin        | Purification                                                                                        |
|---------------------------------|---------------|-----------------------------------------------------------------------------------------------------|
| CH <sub>2</sub> Cl <sub>2</sub> | local trade   | taken from SPS and stored over molecular sieves (3 Å)                                               |
| THF                             | local trade   | taken from SPS and stored over molecular sieves (3 Å)                                               |
| benzene                         | local trade   | dried over Na/benzophenone<br>stored over molecular sieves (3 Å)                                    |
| toluene                         | local trade   | taken from SPS and stored over molecular sieves (3 Å)                                               |
| <i>n</i> -pentane               | local trade   | dried over Na/benzophenone<br>stored over molecular sieves (3 Å)                                    |
| <i>n</i> -hexane                | local trade   | taken from SPS and stored over molecular sieves (3 Å)                                               |
| CD <sub>2</sub> Cl <sub>2</sub> | euriso-top    | dried over molecular sieves (3 Å), degassed (three freeze-pump-thaw cycles) and stored in glove box |
| CDCl <sub>3</sub>               | euriso-top    | dried over molecular sieves (3 Å), degassed (three freeze-pump-thaw cycles) and stored in glove box |
| C <sub>6</sub> D <sub>6</sub>   | euriso-top    | dried over molecular sieves (3 Å), degassed (three freeze-pump-thaw cycles) and stored in glove box |
| toluene- <i>d</i> <sub>8</sub>  | euriso-top    | dried over molecular sieves (3 Å), degassed (three freeze-pump-thaw cycles) and stored in glove box |
| [Ir(COD)Cl] <sub>2</sub>        | sigma aldrich |                                                                                                     |

## NMR spectra

$^1\text{H}$ ,  $^1\text{H}\{^{31}\text{P}\}$ ,  $^{11}\text{B}$ ,  $^{11}\text{B}\{^1\text{H}\}$ ,  $^{13}\text{C}\{^1\text{H}\}$  and  $^{31}\text{P}\{^1\text{H}\}$  NMR spectra were recorded at room temperature on Bruker AV300, AV400 or Fourier300 spectrometers. All  $^1\text{H}$  and  $^{13}\text{C}$  chemical shifts were referenced to the solvent signal. ( $\text{CD}_2\text{Cl}_2$ :  $\delta_{\text{H}} = 5.32$  ppm,  $\delta_{\text{C}} = 53.84$  ppm,  $\text{CDCl}_3$ :  $\delta_{\text{H}} = 7.26$  ppm,  $\delta_{\text{C}} = 77.16$  ppm,  $\text{C}_6\text{D}_6$ :  $\delta_{\text{H}} = 7.16$  ppm,  $\delta_{\text{C}} = 128.06$  ppm, toluene- $d_6$ :  $\delta_{\text{H}} = 7.09$  ppm,  $\delta_{\text{C}} = 137.48$  ppm,  $\text{DMSO}-d_6$ :  $\delta_{\text{H}} = 2.50$  ppm,  $\delta_{\text{C}} = 39.52$  ppm).

**IR spectra** of crystalline samples were recorded on a Bruker Alpha II FT-IR spectrometer equipped with an ATR unit at ambient temperature under argon atmosphere or on a Bruker Alpha FT-IR-spectrometer equipped with an ATR unit at ambient temperature under aerobic conditions.

**Elemental analyses** were obtained using a Leco TruSpec Micro CHNS analyser.  $\text{V}_2\text{O}_5$  was used as an oxidiser for CHN analysis of Ir complexes, circumventing possible Ir carbide formation.

**Melting points** (uncorrected) were determined using a Mettler-Toledo MP 70 Melt at a heating rate of  $5\text{ }^\circ\text{C}/\text{min}$ . Clearing points are reported.

**Mass spectra** were recorded on a Thermo Electron MAT 95-XP sector field mass spectrometer using crystalline samples.

**UV/vis spectra** were recorded on a SPECORD S 600 UV/VIS spectrometer with a diode-array detector. The samples were dissolved in toluene in a 1 cm quartz cuvette with a Schlenk-Valve.

**SEC** analysis was done using a 1100 GPC (Agilent Technologies) with a refraction index detector at  $25\text{ }^\circ\text{C}$ . The measurements were performed at a constant temperature of  $25\text{ }^\circ\text{C}$  using three columns with a polyester copolymer network as stationary phase (PSS GRAM 1000 Å,  $5\text{ }\mu\text{m}$  particle size,  $8.0 \times 300$  mm; PSS GRAM 100 000 Å,  $5\text{ }\mu\text{m}$  particle size,  $8.0 \times 300$  mm; PSS GRAM 1 000 000 Å). Non-stabilised THF (HPLC grade) with 1 w%  $\text{Bu}_4\text{NBr}$  added was applied as the mobile phase with a flow rate of  $1\text{ mL min}^{-1}$ . For this purpose, 1–3 mg of the sample were dissolved in 1 mL of THF. For the recording and the evaluation of the measurement the software PSS WINGPC 6@UniChrome (PSS) was used.

## 2 Crystallographic Details

### X-ray Structure Determination

X-ray quality crystals were selected in Fomblin YR-1800 perfluoroether (Alfa Aesar) at low temperature. Diffraction data were collected at 123(2) K on a Bruker Kappa APEX II Duo diffractometer using Mo-K $\alpha$  radiation **2** or Cu-K $\alpha$  radiation **4**. The structures were solved by iterative (SHELXT)<sup>2</sup> or direct methods (SHELXS-97)<sup>3</sup> and refined by full matrix least square techniques against F<sup>2</sup> (SHELXL-2014)<sup>4</sup>. Semi-empirical absorption corrections were applied (SADABS<sup>5</sup> or TWINABS<sup>6</sup>/Bruker). The non-hydrogen atoms were refined anisotropically. The hydrogen atoms, except the hydrides, were placed into theoretical positions and were refined using the riding model. DIAMOND (Crystal Impact GbR) was used for structure representations.

For complex **4**, electron densities up to 2.2 e/Å<sup>3</sup> are found at a distance of about 0.8 Å from the Ir centre. Therefore, in the last refinement cycles, the positions of H2Ir and H4Ir had to be fixed with restraints.

Crystallographic data (excluding structure factors) for the structures reported in this paper have been deposited at the Cambridge Crystallographic Data Centre. Copies of the data can be obtained free of charge on application to CCDC, 12 Union Road, Cambridge, CB21EZ, UK (fax: int. code + (1223) 336-033; e-mail: deposit@ccdc.cam.ac.uk

**Table S 2. Crystallographic details.**

| Compound                                                                                 | [( <sup>t</sup> BuPBP)Ir(H) <sub>2</sub> (CO)] (2)                                                  | [( <sup>t</sup> BuPBP)Ir(H) <sub>4</sub> ] (4)                                                   |
|------------------------------------------------------------------------------------------|-----------------------------------------------------------------------------------------------------|--------------------------------------------------------------------------------------------------|
| Chem. Formula                                                                            | C <sub>25</sub> H <sub>46</sub> BIrN <sub>2</sub> OP <sub>2</sub> , C <sub>4</sub> H <sub>8</sub> O | C <sub>24</sub> H <sub>48</sub> BIrN <sub>2</sub> P <sub>2</sub> , C <sub>7</sub> H <sub>8</sub> |
| Formula weight [g/mol]                                                                   | 727.69                                                                                              | 721.72                                                                                           |
| Colour                                                                                   | red                                                                                                 | colourless                                                                                       |
| Crystal system                                                                           | orthorhombic                                                                                        | monoclinic                                                                                       |
| Space group                                                                              | <i>Pbca</i>                                                                                         | <i>P2<sub>1</sub>/c</i>                                                                          |
| <i>a</i> [Å]                                                                             | 15.5170(6)                                                                                          | 19.1126(7)                                                                                       |
| <i>b</i> [Å]                                                                             | 12.1309(5)                                                                                          | 15.5043(6)                                                                                       |
| <i>c</i> [Å]                                                                             | 34.2767(13)                                                                                         | 11.6052(4)                                                                                       |
| $\alpha$ [°]                                                                             | 90                                                                                                  | 90                                                                                               |
| $\beta$ [°]                                                                              | 90                                                                                                  | 106.885(2)                                                                                       |
| $\gamma$ [°]                                                                             | 90                                                                                                  | 90                                                                                               |
| <i>V</i> [Å <sup>3</sup> ]                                                               | 6452.1(44)                                                                                          | 3290.7(2)                                                                                        |
| <i>Z</i>                                                                                 | 8                                                                                                   | 4                                                                                                |
| $\rho_{\text{calcd.}}$ [g/cm <sup>3</sup> ]                                              | 1.498                                                                                               | 1.457                                                                                            |
| $\mu$ [mm <sup>-1</sup> ]                                                                | 4.265                                                                                               | 8.919                                                                                            |
| <i>T</i> [K]                                                                             | 150(2)                                                                                              | 150(2)                                                                                           |
| Measured reflections                                                                     | 103504                                                                                              | 5445                                                                                             |
| Independent reflections                                                                  | 6333                                                                                                | 5445                                                                                             |
| Reflections with $I > 2\sigma(I)$                                                        | 5497                                                                                                | 4370                                                                                             |
| <i>R</i> <sub>int</sub>                                                                  | 0.0437                                                                                              | 0.0855                                                                                           |
| <i>F</i> (000)                                                                           | 2960                                                                                                | 1472                                                                                             |
| <i>R</i> <sub>1</sub> ( <i>R</i> [ <i>F</i> <sup>2</sup> > 2σ( <i>F</i> <sup>2</sup> )]) | 0.0222                                                                                              | 0.0614                                                                                           |
| <i>wR</i> <sub>2</sub> ( <i>F</i> <sup>2</sup> )                                         | 0.0483                                                                                              | 0.1519                                                                                           |
| Goof                                                                                     | 1.078                                                                                               | 1.079                                                                                            |
| No. of Parameters                                                                        | 354                                                                                                 | 363                                                                                              |
| CCDC #                                                                                   | 2204735                                                                                             | 2204734                                                                                          |

### 3 Preparation of complexes

#### 3.1 Synthesis of $[(^t\text{BuPBP})\text{Ir}(\text{H})_2(\text{CO})]$ (**2**)

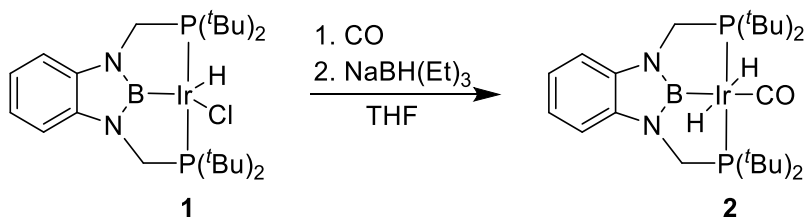

Complex **1** (132 mg, 199  $\mu\text{mol}$ ) was dissolved in THF (8 mL) at room temperature. The reaction mixture was degassed (one freeze-pump-thaw-cycle) and CO gas (1 atm) was added to the reaction mixture at room temperature for 30 min. During that, a colour change from yellow to bright yellow was observed. The reaction mixture was cooled to  $-78^\circ\text{C}$ , cold  $\text{NaBH(Et)}_3\text{H}$  (219  $\mu\text{L}$ , 219  $\mu\text{mol}$ , 1.0  $\text{mol}\cdot\text{L}^{-1}$  in toluene) was slowly added and the mixture was stirred for another 15 min at ambient temperature. The reaction mixture was warmed to room temperature and stirred for another 10 min at this temperature. The solvent was removed in vacuum and the residue was extracted with benzene (2x5 mL). The solvent of the extract was removed in vacuum, yielding an orange/red coloured amorphous solid, which was recrystallised from a saturated benzene solution at room temperature to yield orange crystals (75.6 mg, 115  $\mu\text{mol}$ , 58%).

**$^1\text{H}$  NMR** (400 MHz,  $\text{CD}_2\text{Cl}_2$ ):  $\delta$  -12.23 (t,  $J = 14.6$  Hz, 2H, 2x Ir-H), 1.36 (t,  $J = 6.7$  Hz, 36H, 2x  $\text{PC}(\text{CH}_3)_3$ ), 3.82 (t,  $J = 2.3$  Hz, 4H, 2x  $\text{CH}_2$ ), 6.72–6.81 (m, 4H, Ar-H) ppm.  **$^{31}\text{P}\{^1\text{H}\}$  NMR** (162 MHz,  $\text{CD}_2\text{Cl}_2$ ):  $\delta$  88.6 (s) ppm.  **$^{11}\text{B}\{^1\text{H}\}$  NMR** (96 MHz, toluene- $d_6$ ):  $\delta$  52.7 (br s) ppm.  **$^{13}\text{C}\{^1\text{H}\}$  NMR** (101 MHz, toluene- $d_6$ ): 29.7 ( $\text{PC}(\text{CH}_3)_3$ ), 34.9 ( $\text{PC}(\text{CH}_3)_3$ ), 43.5 ( $\text{CH}_2$ ), 108.7 ( $m\text{-C}_{\text{Ar}}$ ), 118.0 ( $o\text{-C}_{\text{Ar}}$ ), 140.8 ( $C_{\text{q-Ar}}$ ), 183.0 (CO) ppm. **IR** (ATR, 32 scans,  $\text{cm}^{-1}$ ):  $\tilde{\nu}$  2037.0  $\text{cm}^{-1}$  (Ir-H), 1963.6  $\text{cm}^{-1}$  (Ir-CO), 1818.8  $\text{cm}^{-1}$  (Ir-H). **MS** ( $\text{Cl}^+$ , iso-butane)  $m/z$  (%): 654  $[\text{M-H}^+]$ , 655  $[\text{M-H}^+]$ .

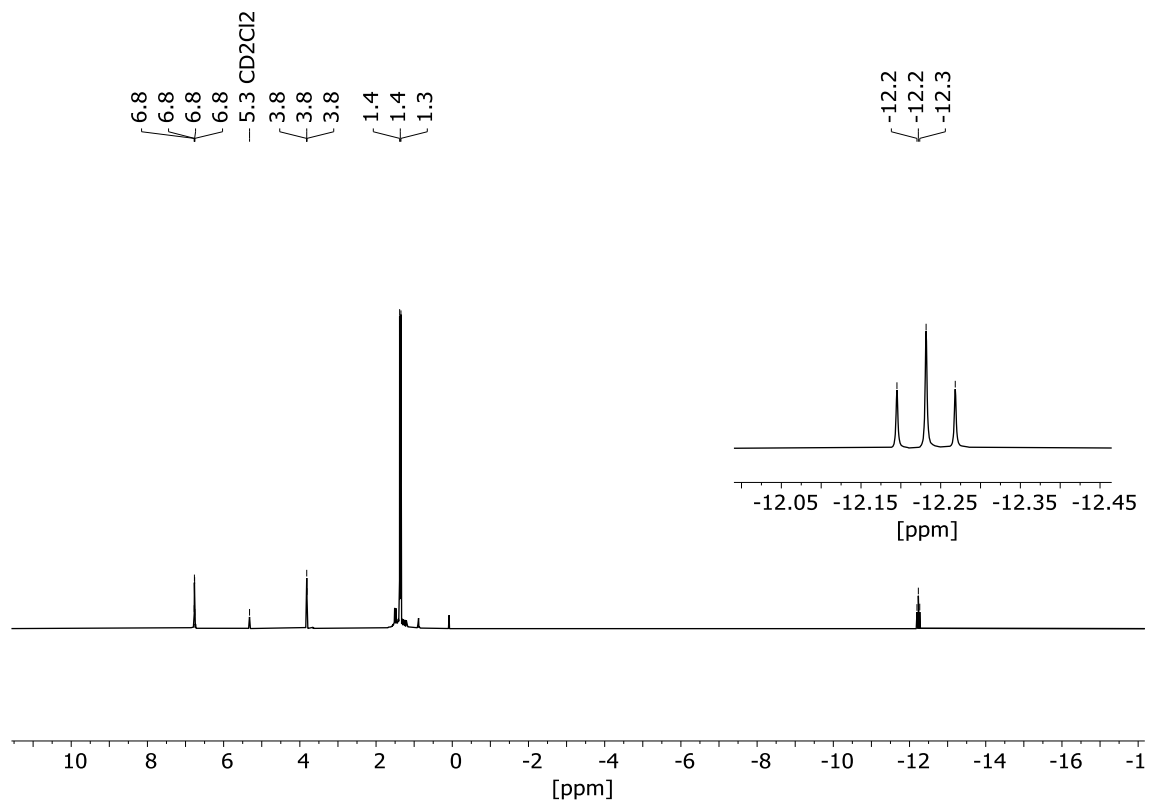

**Figure S 1.**  $^1\text{H}$  NMR spectrum ( $\text{CD}_2\text{Cl}_2$ , 400 MHz, 298 K) of complex **2**.

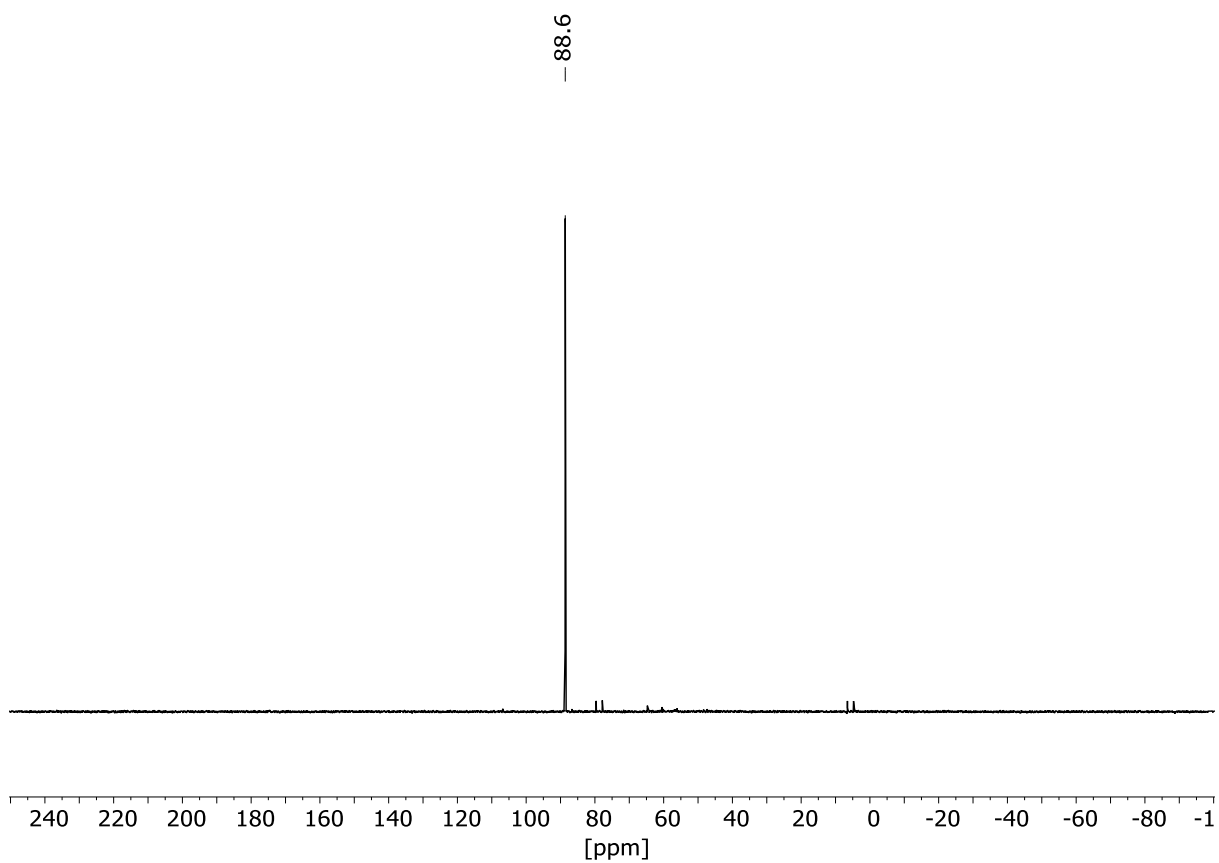

**Figure S 2.**  $^{31}\text{P}\{^1\text{H}\}$  NMR spectrum ( $\text{CD}_2\text{Cl}_2$ , 162 MHz, 298 K) of complex **2**.



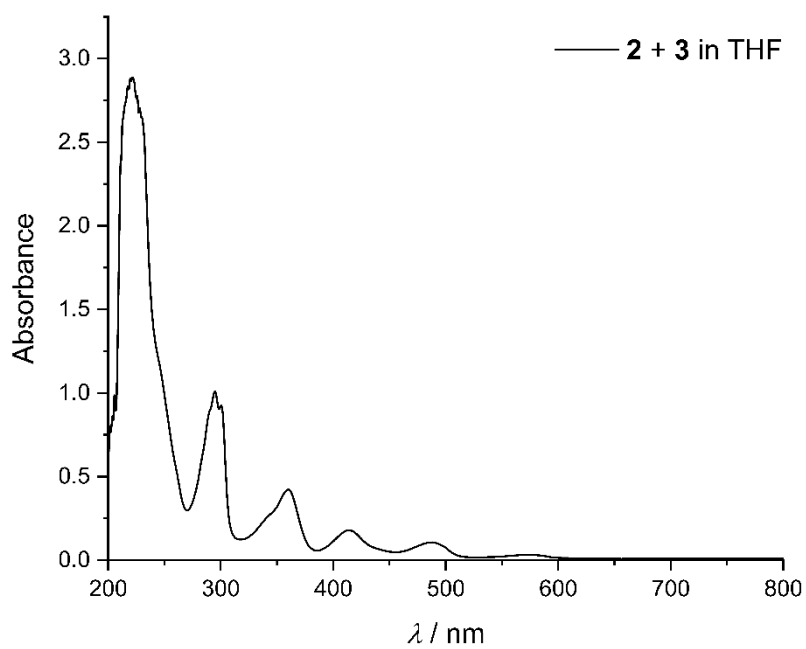

**Figure S 3.** UV/vis spectrum of complex 2+3 in THF.

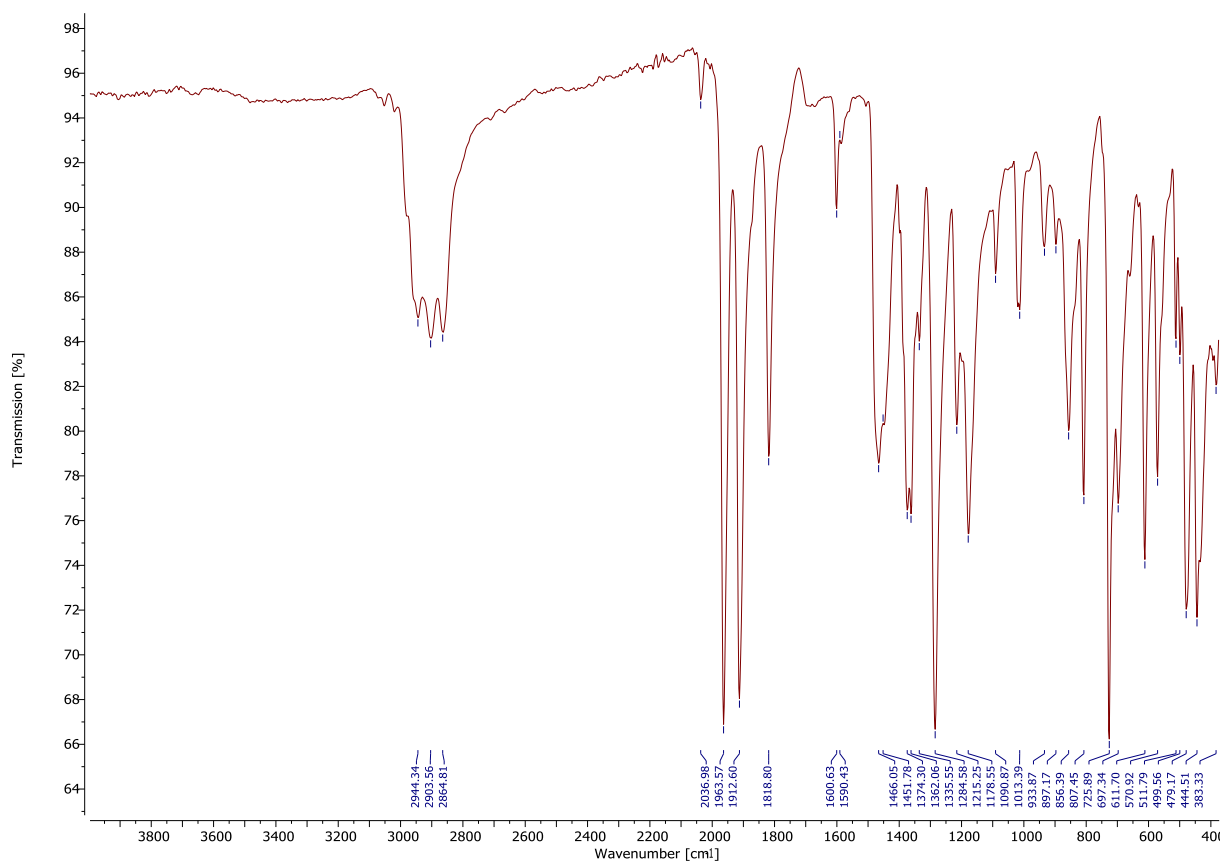

**Figure S 4.** IR spectrum of complex 2.

### 3.2 Synthesis of [(<sup>t</sup>BuPBP)Ir(CO)] (3)

Complex **1** (135 mg, 204 μmol) was dissolved in toluene (8 mL) at room temperature. The reaction mixture was degassed (one freeze-pump-thaw-cycle) and CO gas (1 atm) was added to the reaction mixture at room temperature for 30 min. During that, a colour change from yellow to bright yellow was observed. The reaction mixture was cooled to  $-78\text{ }^{\circ}\text{C}$ , cold NaBEt<sub>3</sub>H (224 μL, 224 μmol, 1.0 mol·L<sup>-1</sup> in toluene) was slowly added and the mixture was stirred for another 15 min at ambient temperature. The reaction mixture was warmed to room temperature and stirred for another 10 min at this temperature. The solvent was removed in vacuum and the residue was extracted with pentane (2x5 mL). The solvent of the extract was removed in vacuum, yielding a red coloured amorphous solid, which was recrystallised from a saturated benzene solution at room temperature to yield red crystals (68.1 mg, 104.2 μmol, 51%).

**<sup>1</sup>H NMR** (300 MHz, C<sub>6</sub>D<sub>6</sub>): δ 1.24 (t,  $J = 6.6$  Hz, 36 H, 2x PC(CH<sub>3</sub>)<sub>3</sub>), 3.99 (s, 4H, 2x CH<sub>2</sub>), 7.03–7.08 (m, 2H, Ar-H), 7.15–7.18 (m, 2H, Ar-H) ppm. **<sup>31</sup>P{<sup>1</sup>H} NMR** (122 MHz, C<sub>6</sub>D<sub>6</sub>): δ 107.2 (s) ppm. **<sup>11</sup>B{<sup>1</sup>H} NMR** (96 MHz, C<sub>6</sub>D<sub>6</sub>): δ 61.8 (br s) ppm. **<sup>13</sup>C{<sup>1</sup>H} NMR** (75 MHz, C<sub>6</sub>D<sub>6</sub>): δ 29.9 (t,  $J = 3.1$  Hz, PC(CH<sub>3</sub>)<sub>3</sub>), 37.1 (t,  $J = 9.2$  Hz, PC(CH<sub>3</sub>)<sub>3</sub>), 43.6 (t,  $J = 19.8$  Hz CH<sub>2</sub>), 109.8 (s, *m*-C<sub>Ar</sub>), 118.7 (s, *o*-C<sub>Ar</sub>), 139.9 140.8 (s, C<sub>q</sub>-Ar), 211.4 (s, CO) ppm. **IR** (ATR, 32 scans, cm<sup>-1</sup>):  $\tilde{\nu}$  1912.6 cm<sup>-1</sup> (Ir–CO). **MS** (Cl<sup>+</sup>, *iso*-butane)  $m/z$  (%): 655 [M+H<sup>+</sup>].

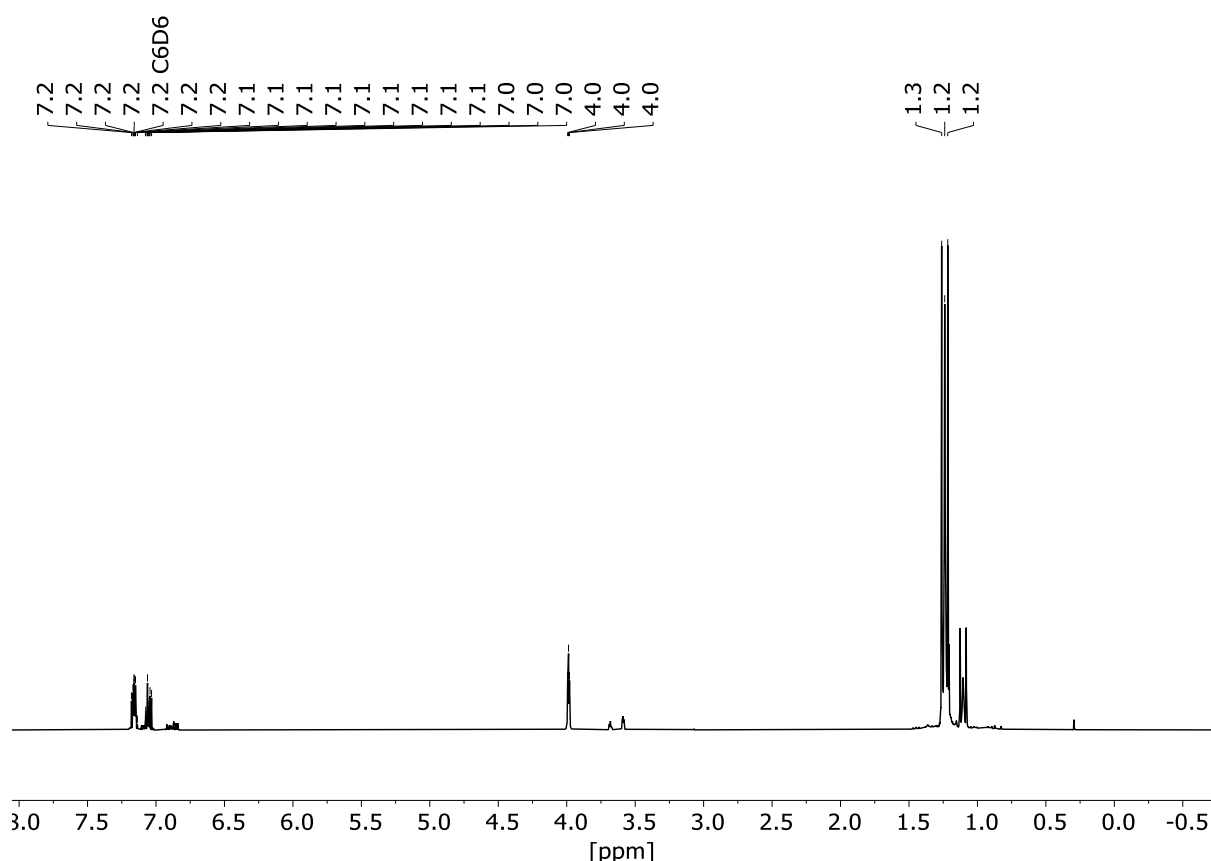

**Figure S 5.** <sup>1</sup>H NMR spectrum (C<sub>6</sub>D<sub>6</sub>, 300 MHz, 298 K) of complex **3**.

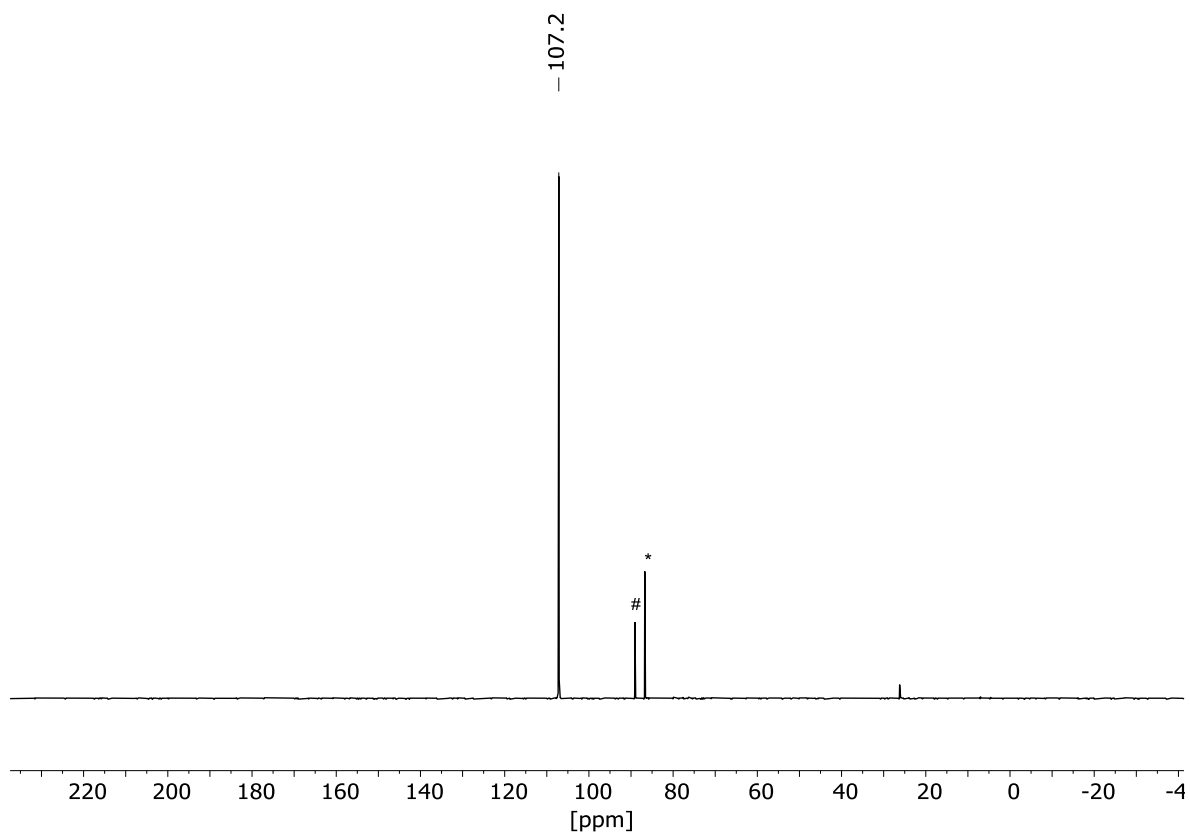

**Figure S 6.**  $^{31}\text{P}\{^1\text{H}\}$  NMR spectrum ( $\text{C}_6\text{D}_6$ , 122 MHz, 298 K) of complex 3. \* complex 1, # complex 2.

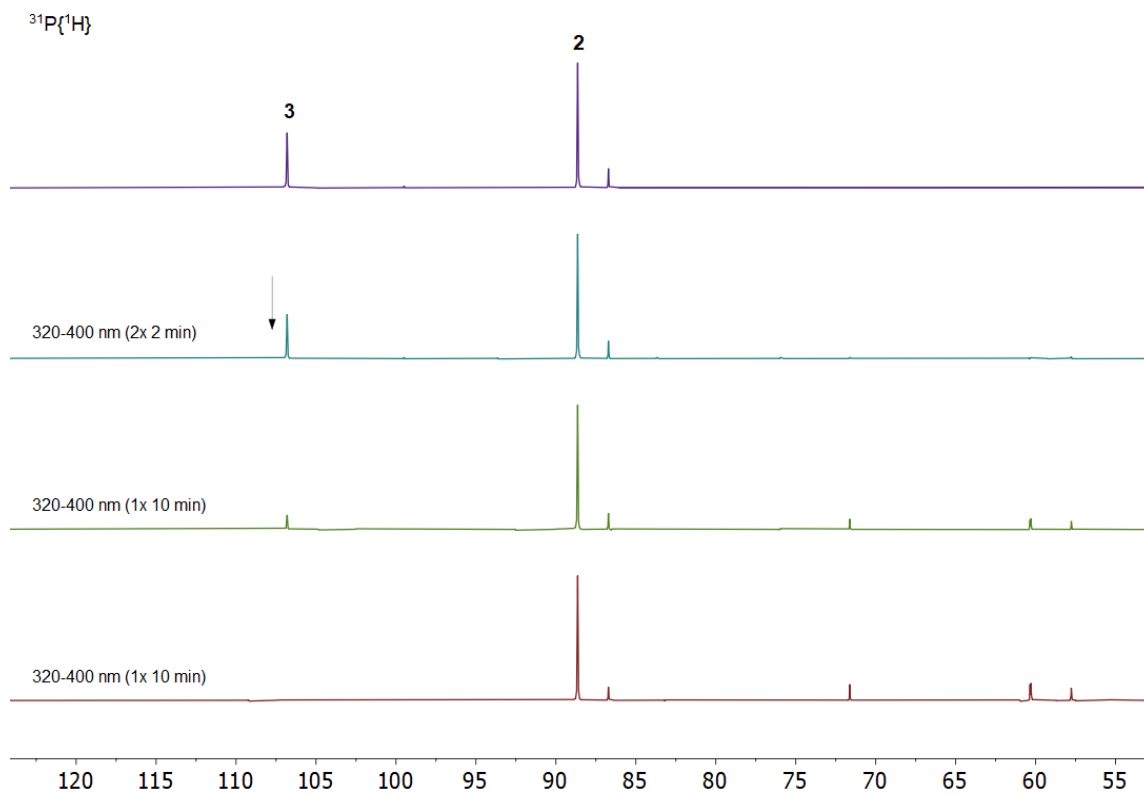

**Figure S 7.**  $^{31}\text{P}\{^1\text{H}\}$  NMR spectrum ( $\text{CD}_2\text{Cl}_2$ , 122 MHz, 298 K) of a mixture of complexes 2 and 3. Top: before irradiation ( $\lambda = 320\text{--}400$  nm). Bottom: after irradiation ( $t_{\text{total}} = 24$  min). Photodissociation of CO from 3 was observed.

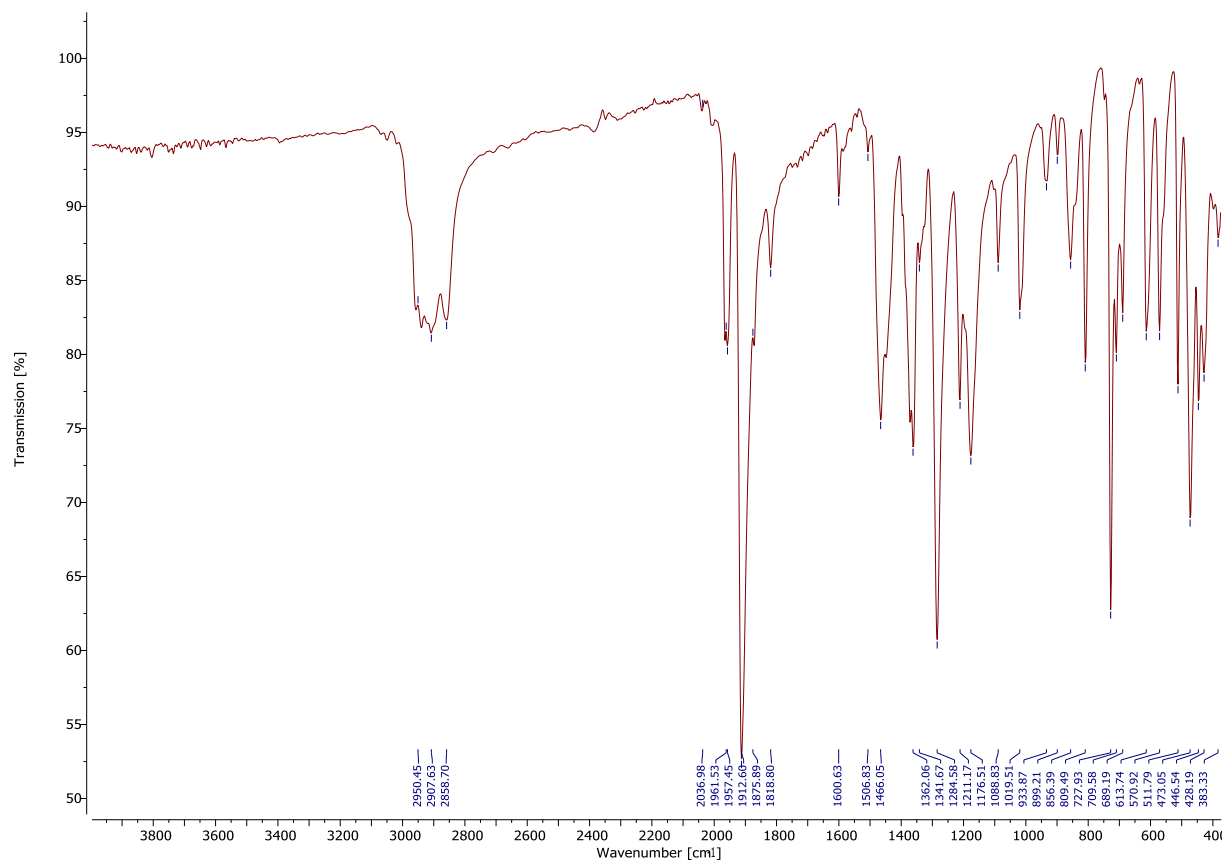

**Figure S 8.** IR spectrum of complex **3**.

### 3.3 Stoichiometric reaction of complex **1** with H<sub>3</sub>B·NMeH<sub>2</sub>

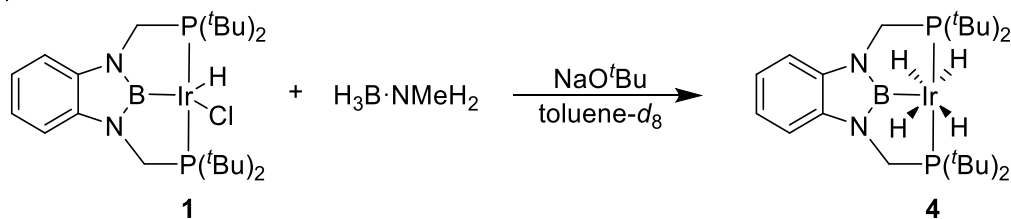

Precatalyst **1** (23.0 mg, 34.7  $\mu\text{mol}$ ), H<sub>3</sub>B·NMeH<sub>2</sub> (1.56 mg, 34.7  $\mu\text{mol}$ ) and NaOtBu (3.51 mg, 36.5  $\mu\text{mol}$ ) were dissolved in toluene-*d*<sub>8</sub> (0.7 mL) in a Young-NMR-tube. The colour of the reaction mixture turns from yellow to dark brown within a few minutes. <sup>1</sup>H NMR monitoring of the progress of the reaction shows a broad singlet at -10.0 ppm. The reaction mixture was filtered under hydrogen atmosphere. The solvent was evaporated in a hydrogen stream to  $\approx$  0.2 mL. After few days colourless crystals of **4** were formed and analysed by X-ray diffraction. Removing the solvent in vacuo, results in the formation of undefined reaction products.

<sup>1</sup>H NMR (400 MHz, C<sub>6</sub>D<sub>6</sub>):  $\delta$  -9.88 (br. s, 4 H), 1.19 (t,  $J$  = 6.8 Hz, 36 H, 2x PC(CH<sub>3</sub>)<sub>3</sub>), 3.56 (t,  $J$  = 2.3 Hz 4 H, 2x CH<sub>2</sub>), 6.86–6.94 (m, 2H, Ar-H), 7.04–7.11 (m, 2H, Ar-H) ppm. <sup>31</sup>P{<sup>1</sup>H} NMR (162 MHz, C<sub>6</sub>D<sub>6</sub>):  $\delta$  87.7 (s) ppm. <sup>11</sup>B NMR (128 MHz, C<sub>6</sub>D<sub>6</sub>):  $\delta$  50.5 (br s) ppm. <sup>13</sup>C{<sup>1</sup>H} NMR (101 MHz, C<sub>6</sub>D<sub>6</sub>):  $\delta$  29.5 (PC(CH<sub>3</sub>)<sub>3</sub>), 33.3 (PC(CH<sub>3</sub>)<sub>3</sub>), 43.1 (CH<sub>2</sub>), 108.5 (*m*-C<sub>Ar</sub>), 118.2 (*o*-C<sub>Ar</sub>), 142.2 (C<sub>q-Ar</sub>) ppm.

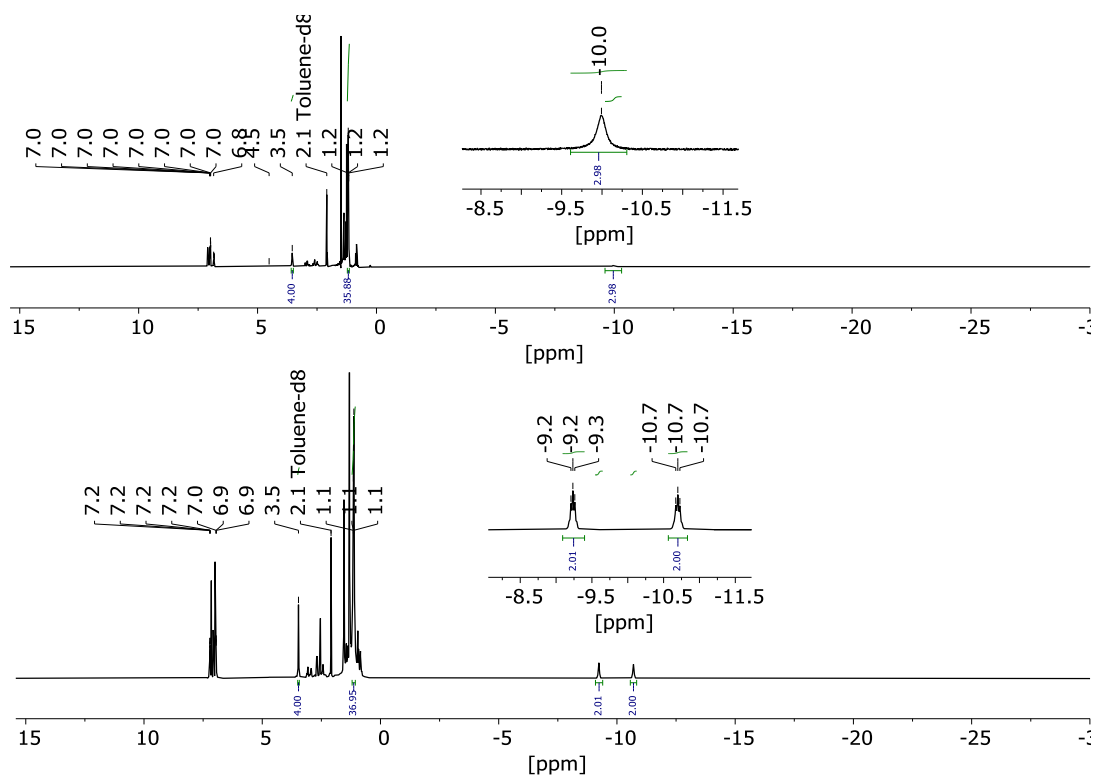

**Figure S 9.** Top: *in situ* <sup>1</sup>H NMR spectrum (toluene-*d*<sub>8</sub>, 300 MHz) of the reaction of complex **1** with NaOtBu and H<sub>3</sub>B·NMeH<sub>2</sub> at 298 K. Bottom: *in situ* <sup>1</sup>H NMR spectrum (toluene-*d*<sub>8</sub>, 400 MHz) at 207 K.

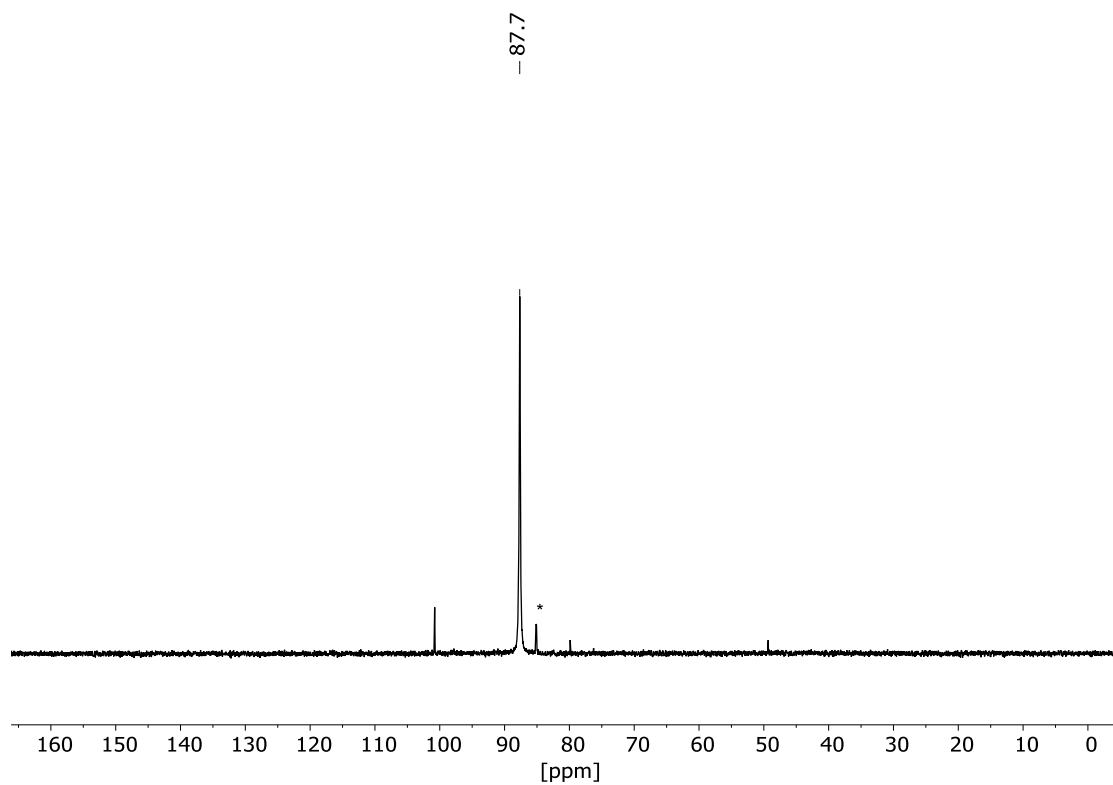

**Figure S 10.** *In situ*  $^{31}\text{P}\{^1\text{H}\}$  NMR spectrum (toluene- $d_8$ , 122 MHz, 298 K) of the reaction of complex **1** with NaOtBu and  $\text{H}_3\text{B}\cdot\text{NMeH}_2$ . \* complex **1**.

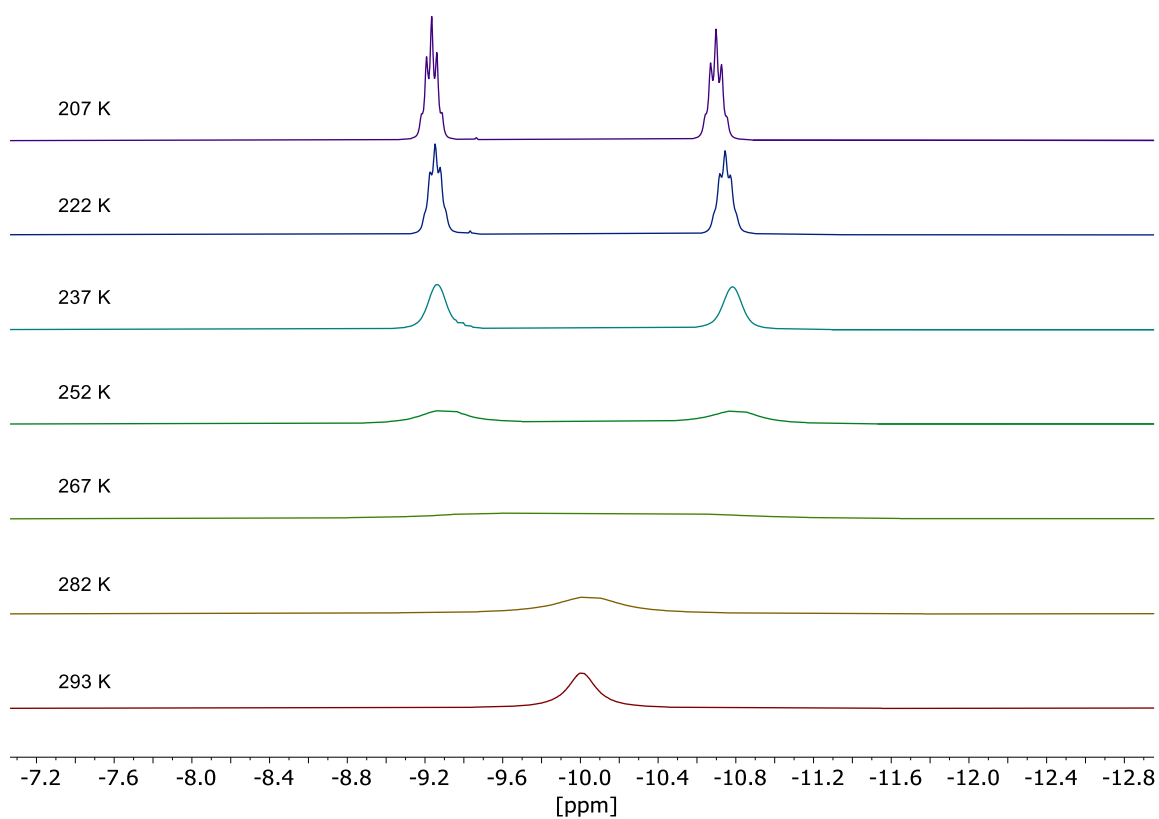

**Figure S 11.** Variable temperature  $^1\text{H}$  NMR experiment (toluene- $d_8$ , 400 MHz) of complex **4**.

Calculation of an estimated energy barrier for dynamic hydride exchange. For this estimation, the following empirical equation was used. It should be noted that the determination of the coalescence point is only a rough approximation which should be sufficient for a qualitative estimation of the calculated energies of the transition state (TS3).

$$\Delta G^\ddagger = RT_c \left[ 22.96 + \ln \left( \frac{T_c}{\delta\nu} \right) \right] \quad \left| \frac{J}{mol} \right|$$

**Equation S 1.**

On the basis of the above shown variable temperature  $^1\text{H}$  NMR experiment (Figure S 11) we estimated the coalescence temperature  $T_c = 267\text{ K}$  and the frequency as  $\delta\nu_{203\text{K}} = 556\text{ Hz}$ .<sup>7</sup>

$$\Delta G^\ddagger = (8.314\text{ J K}^{-1}\text{ mol}^{-1})(267\text{ K}) \left[ 22.96 + \ln \left( \frac{267\text{ K}}{556\text{ s}^{-1}} \right) \right] = 49339\text{ J mol}^{-1} = 49.3\text{ kJ mol}^{-1}$$

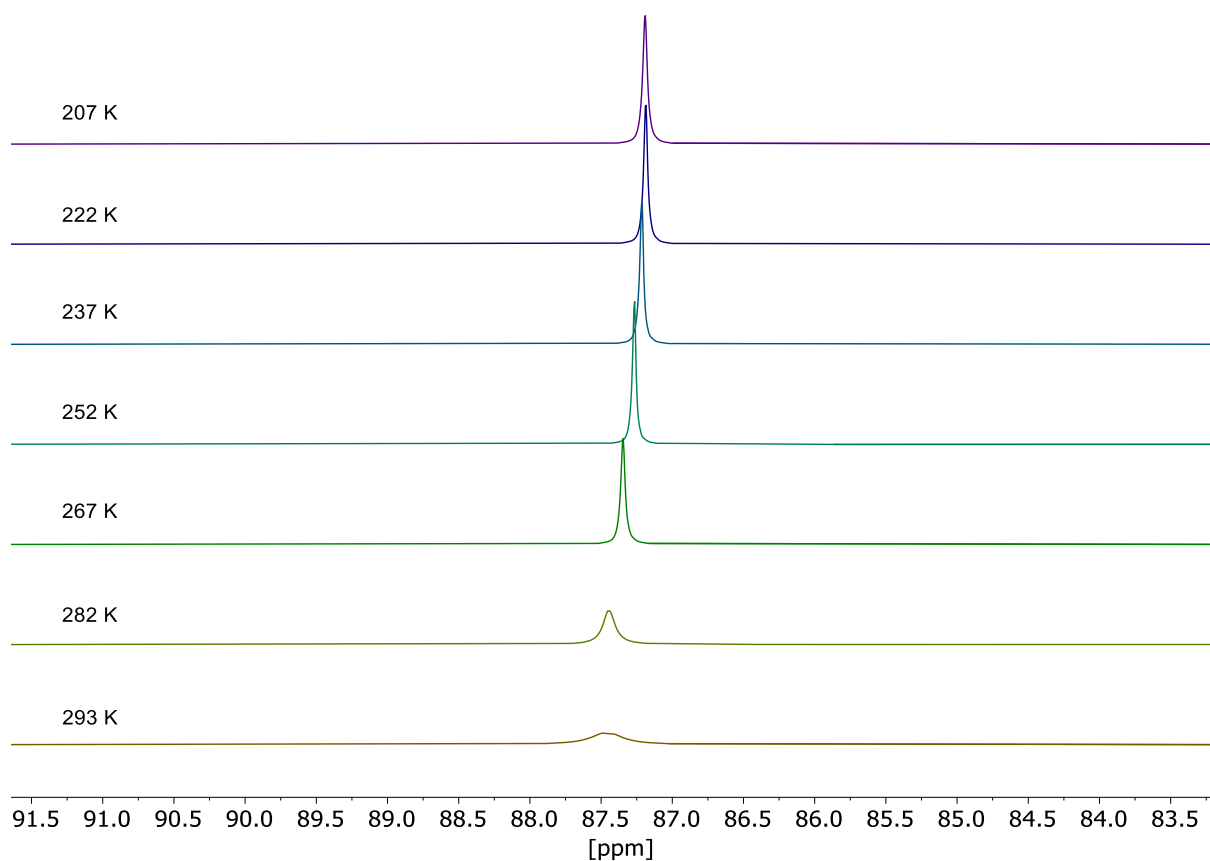

**Figure S 12.** Variable temperature  $^{31}\text{P}\{^1\text{H}\}$  NMR experiment (toluene- $d_6$ , 162 MHz) of complex **4**.

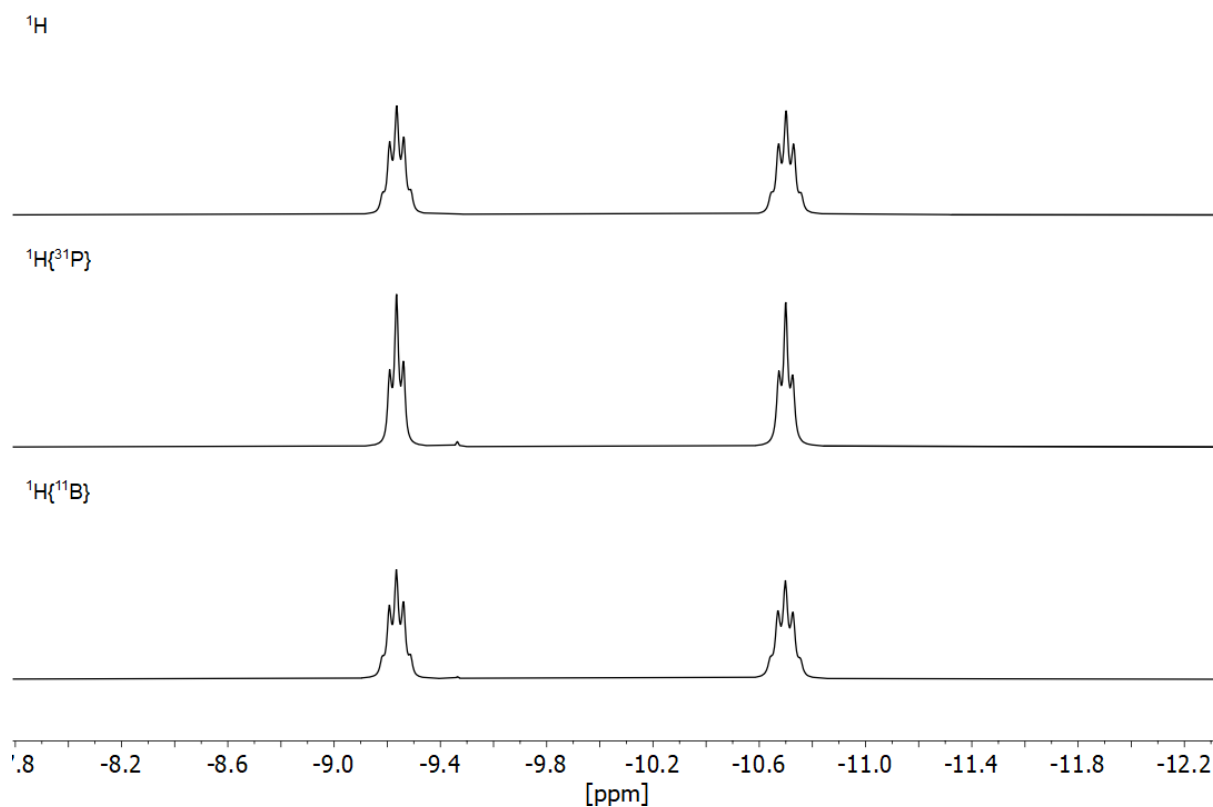

**Figure S 13.**  $^1\text{H}$ ,  $^1\text{H}\{^{31}\text{P}\}$  and  $^1\text{H}\{^{11}\text{B}\}$  NMR spectra (toluene- $d_6$ , 207 K, 400 MHz) of complex **4**.

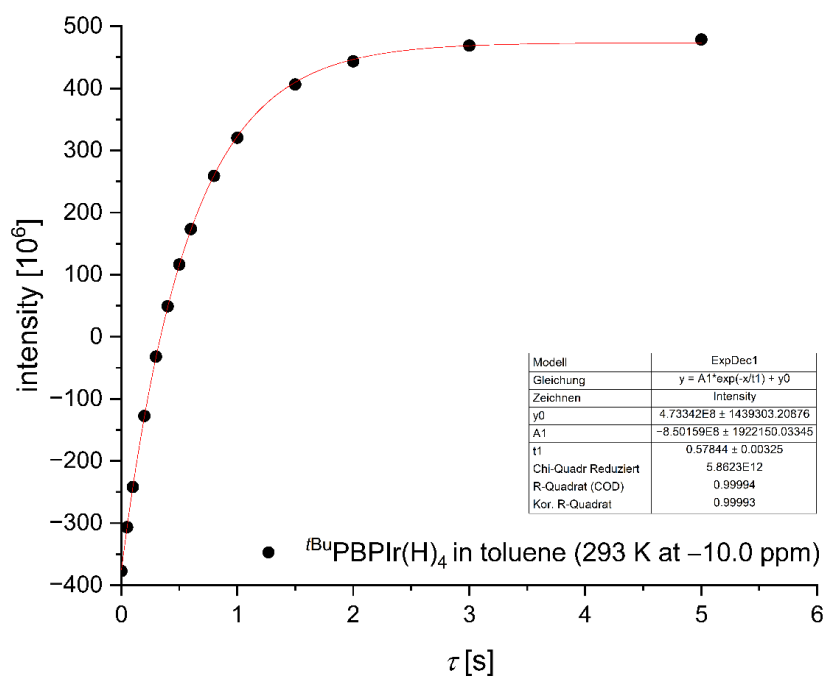

**Figure S 14.** Estimation of the longitudinal relaxation time  $T_1$  for the hydride ligand ( $-10.0$  ppm) by the inversion recovery sequence of **4** in toluene- $d_6$  at 293 K.



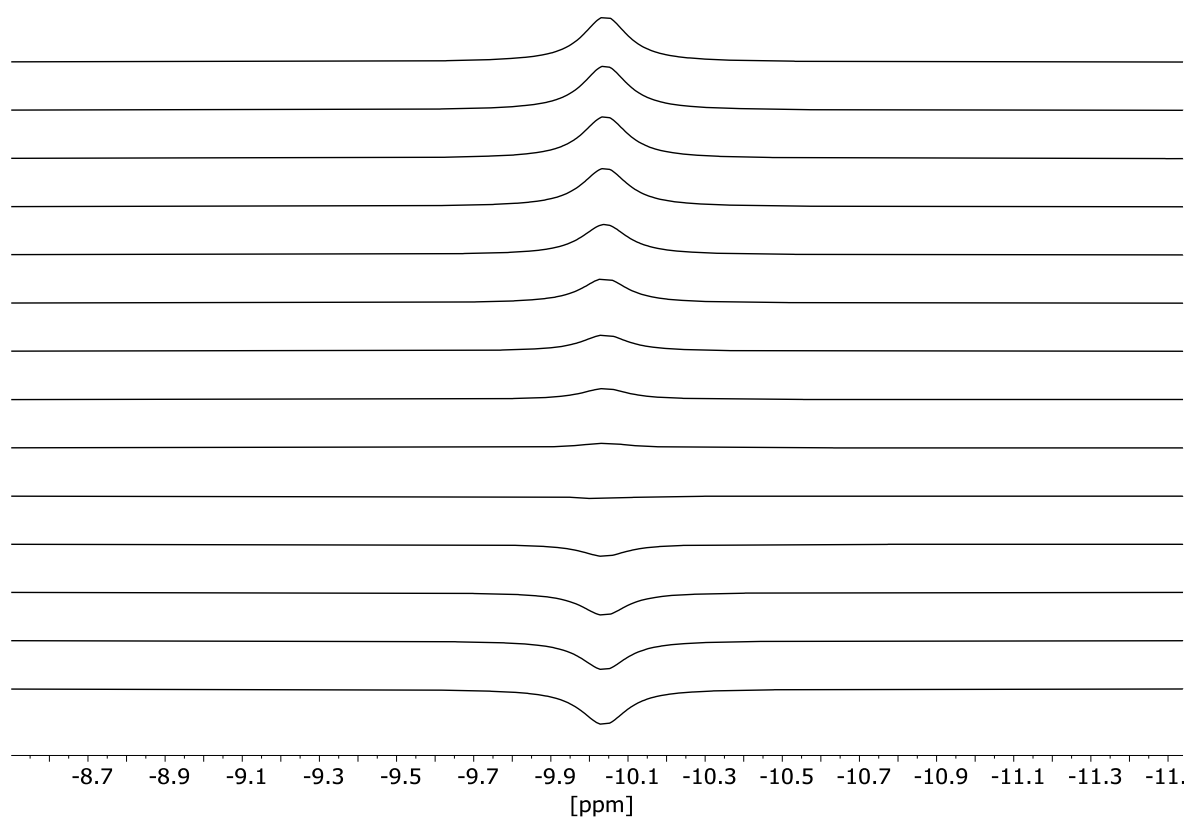

**Figure S 15.**  $^1\text{H}\{^{31}\text{P}\}$  inversion recovery experiment of hydride signal ( $-10.0$  ppm) in toluene- $d_6$  at 293 K of **4**.

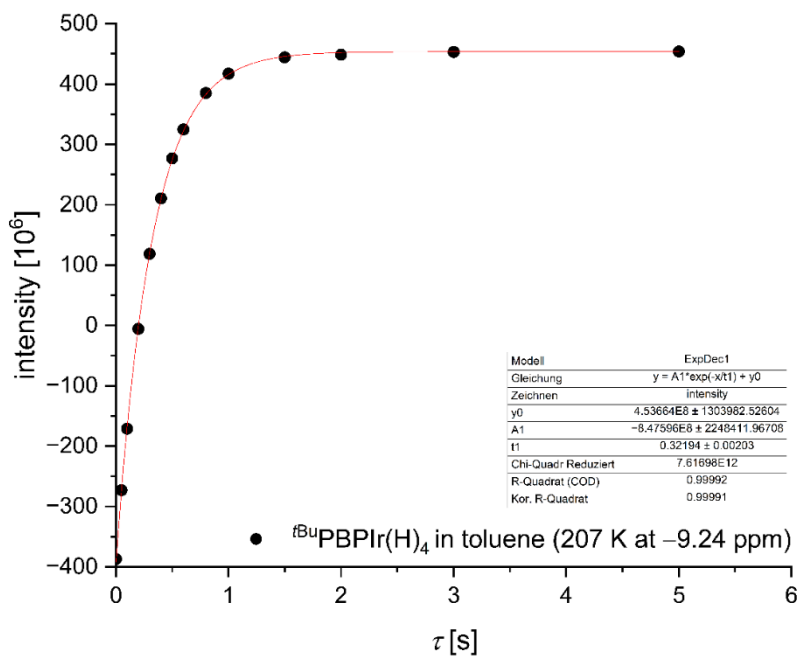

**Figure S 16.** Estimation of the longitudinal relaxation time  $T_1$  for the hydride ligand ( $-9.24$  ppm) by the inversion recovery sequence of **4** in toluene- $d_6$  at 207 K.

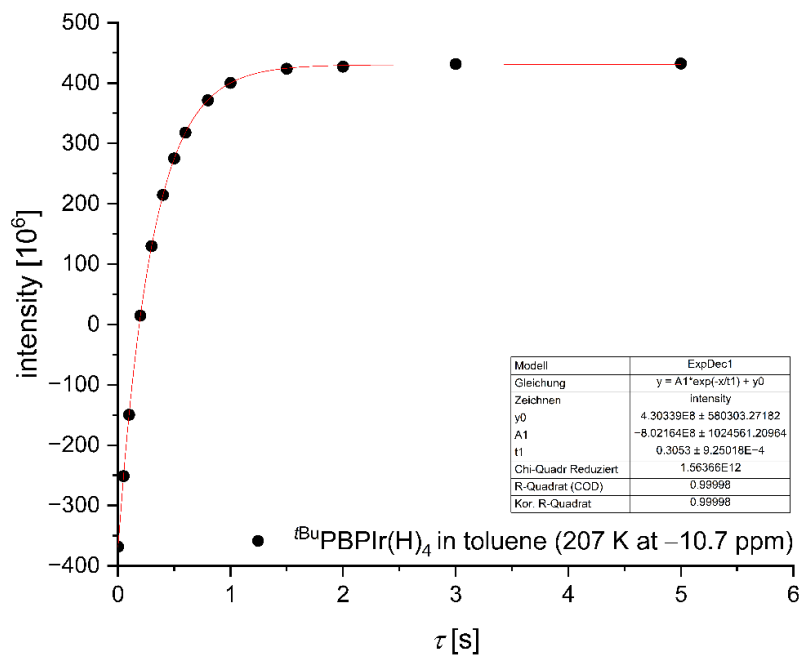

**Figure S 17.** Estimation of the longitudinal relaxation time  $T_1$  for the hydride ligand ( $-10.7$  ppm) by the inversion recovery sequence of **4** in toluene- $d_8$  at 293 K.

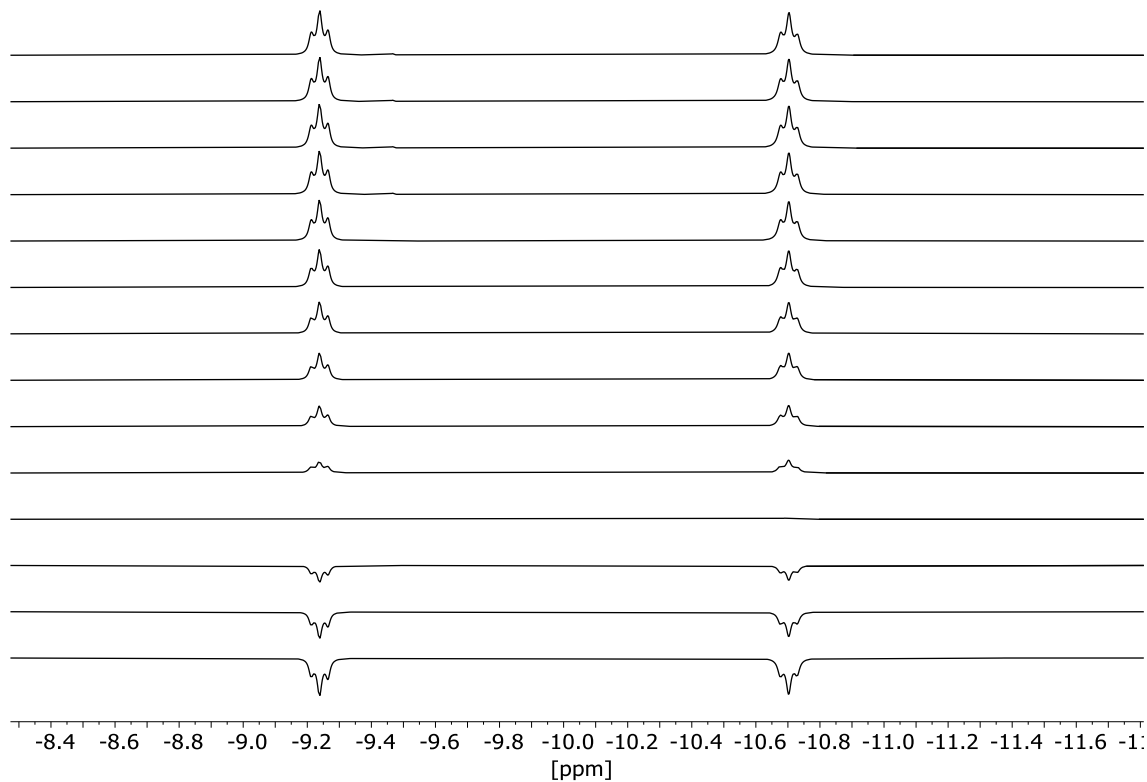

**Figure S 18.**  $^1\text{H}\{^{31}\text{P}\}$  inversion recovery experiment of hydride signals ( $-9.24$  and  $-10.7$  ppm) in toluene- $d_8$  at 207 K of **4**.

### 3.4 Deuteration experiments – Reaction of complex 1 with $D_3B \cdot NMeH_2$ and $NaOtBu$

Precatalyst 1 (35.0 mg, 45.3  $\mu$ mol),  $D_3B \cdot NMeH_2$  (2.17 mg, 45.3  $\mu$ mol) and  $NaOtBu$  (4.57 mg, 47.6  $\mu$ mol) were dissolved in toluene- $d_8$  (0.7 mL) in a Young-NMR-tube. The colour of the reaction mixture turns from yellow to dark brown after a few minutes.  $^1H$  NMR monitoring of the progress of the reaction shows a broad singlet at  $-10.0$  ppm.

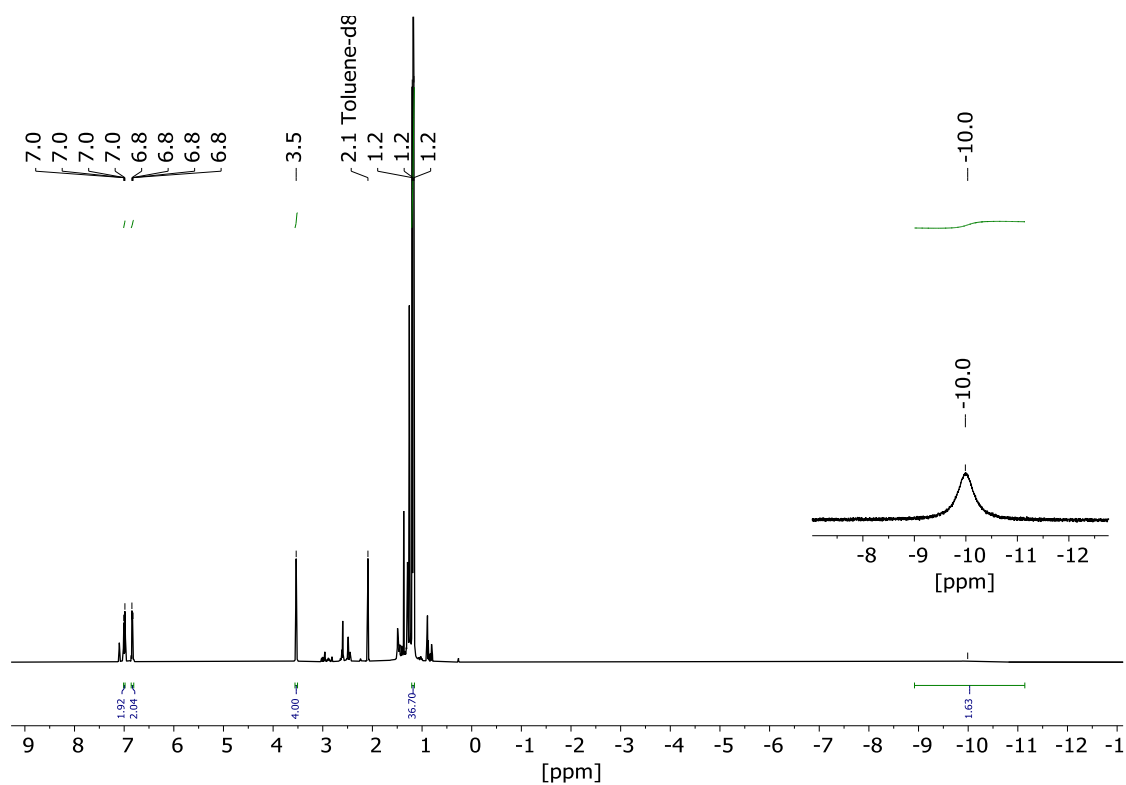

**Figure S 19.**  $^1H$  NMR spectrum (toluene- $d_8$ , 400 MHz, 298 K) of the reaction of complex 1 with  $NaOtBu$  and  $D_3B \cdot NMeH_2$ .

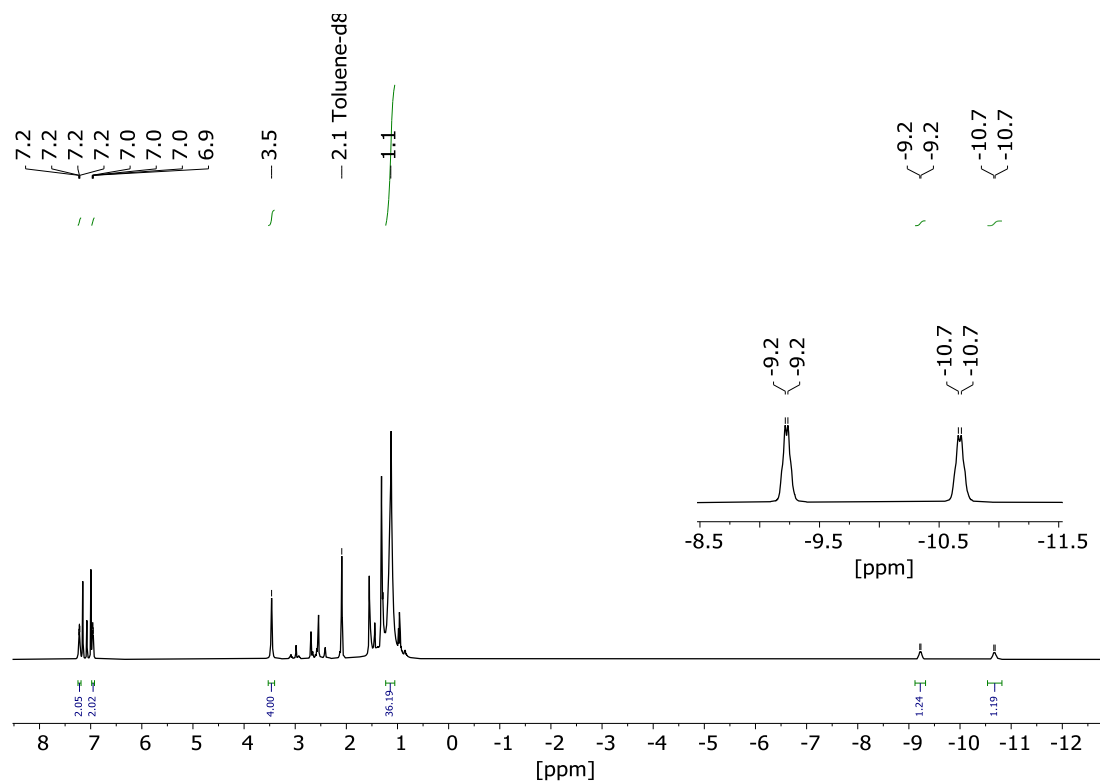

**Figure S 20.**  $^1\text{H}$  NMR spectrum (toluene- $d_8$ , 400 MHz, 203 K) of the reaction of complex **1** with NaOtBu and  $\text{D}_3\text{B}\cdot\text{NMeH}_2$ . Hydride signals at  $\delta$  -9.2 ppm, -10.7 ppm.

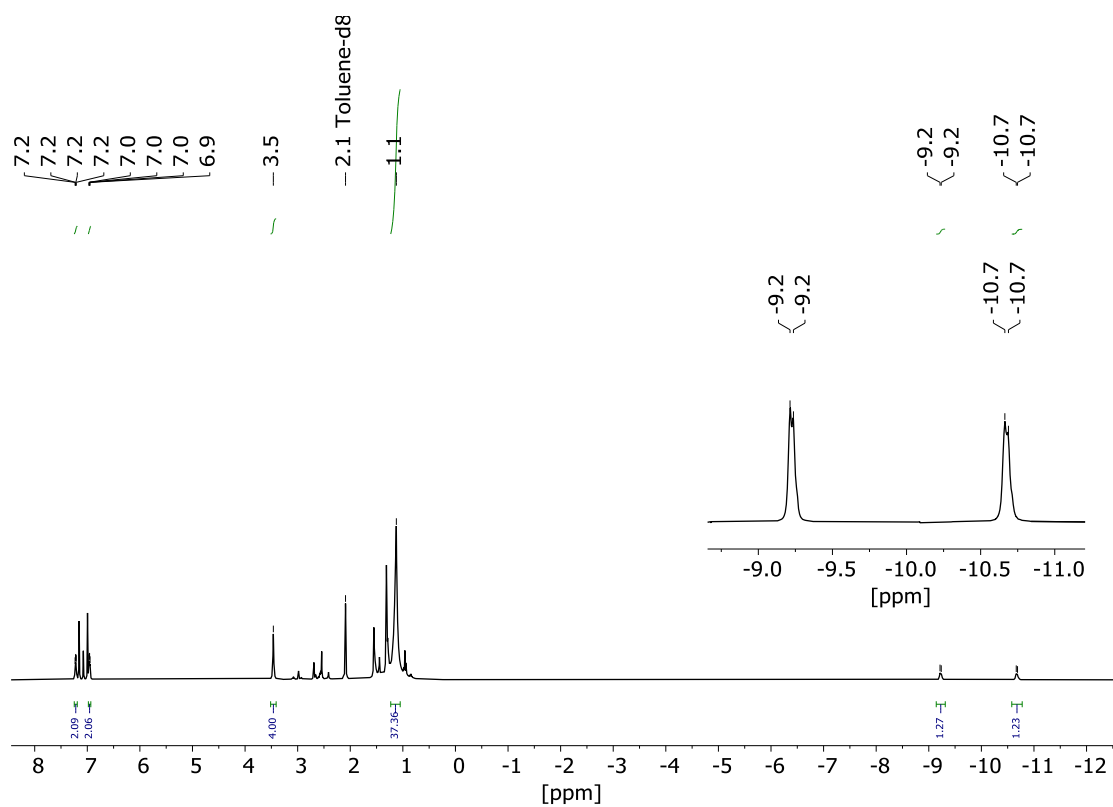

**Figure S 21.**  $^1\text{H}\{^{31}\text{P}\}$  NMR spectrum (toluene- $d_8$ , 400 MHz, 203 K) of the reaction of complex **1** with NaOtBu and  $\text{D}_3\text{B}\cdot\text{NMeH}_2$ . Hydride signals at  $\delta$  -9.2 ppm, -10.7 ppm.

### 3.5 Deuteration experiments – Reaction of 4 with D<sub>2</sub>

Precatalyst **1** (35.0 mg, 45.3 μmol), H<sub>3</sub>B·NMeH<sub>2</sub> (2.03 mg, 45.3 μmol) and NaOtBu (4.57 mg, 47.6 μmol) were dissolved in toluene-*d*<sub>8</sub> (0.7 mL) in a Young-NMR-tube. The colour of the reaction mixture turns from yellow to dark brown after a few minutes. The reaction mixture was frozen, degassed (3x) and the H<sub>2</sub> atmosphere was exchanged with D<sub>2</sub> gas. The reaction mixture was then analysed by NMR experiments at 203 K and room temperature.

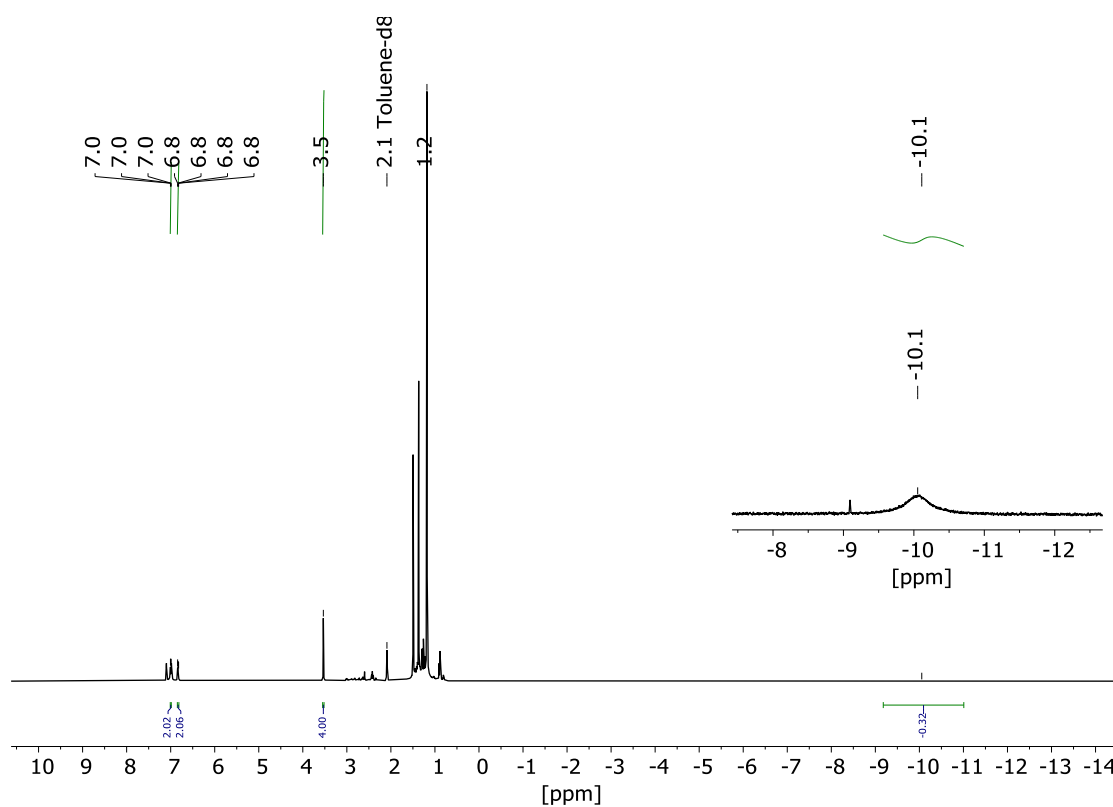

**Figure S 22.** <sup>1</sup>H NMR spectrum (toluene-*d*<sub>8</sub>, 400 MHz, 298 K) of complex **4** after gas exchange with D<sub>2</sub> at room temperature.

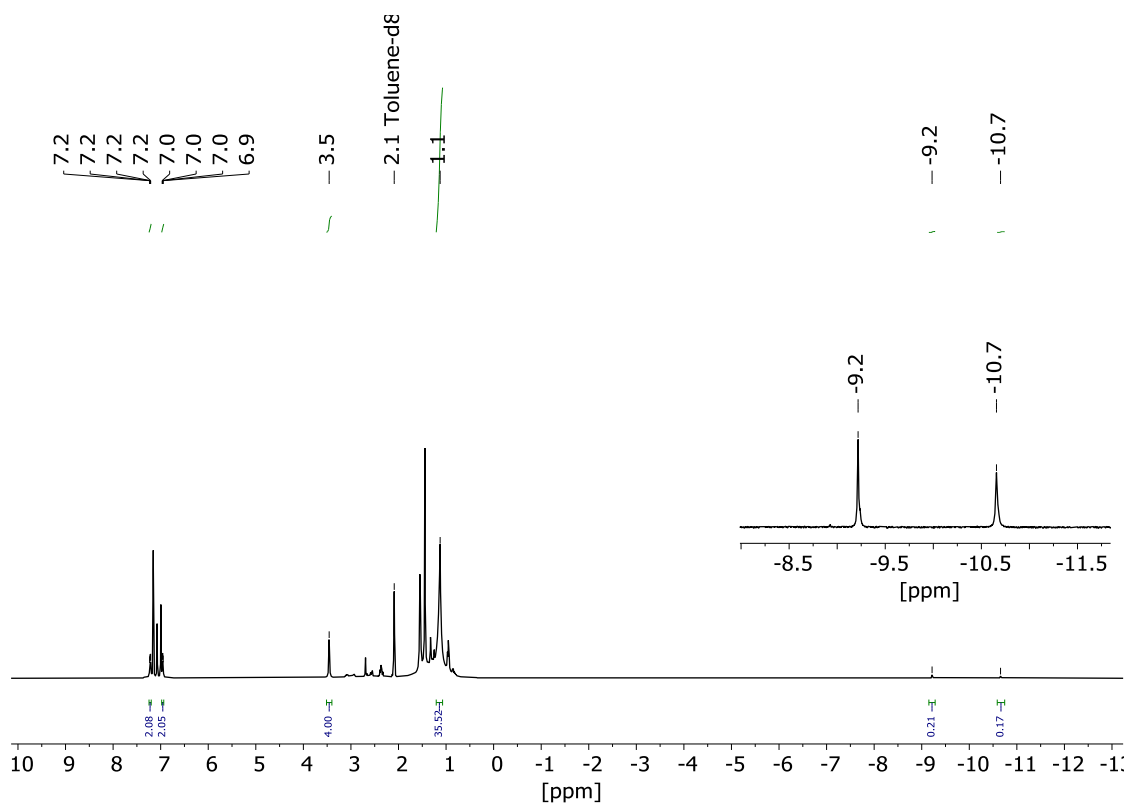

**Figure S 23.**  $^1\text{H}\{^{31}\text{P}\}$  NMR spectrum (toluene- $d_8$ , 400 MHz, 203 K) of complex **4** after gas exchange with  $\text{D}_2$  at room temperature.

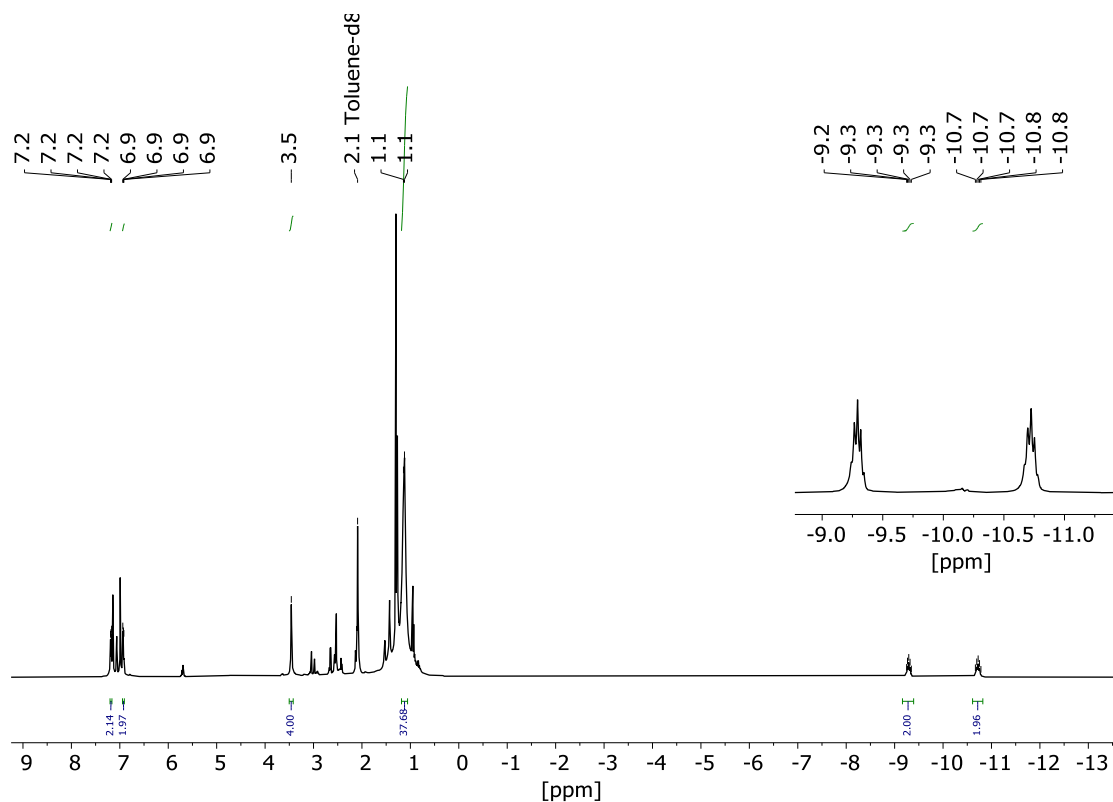

**Figure S 24.**  $^1\text{H}$  NMR spectrum (toluene- $d_8$ , 400 MHz, 203 K) of complex **4** after gas exchange with  $\text{D}_2$  at  $-78\text{ }^\circ\text{C}$ .

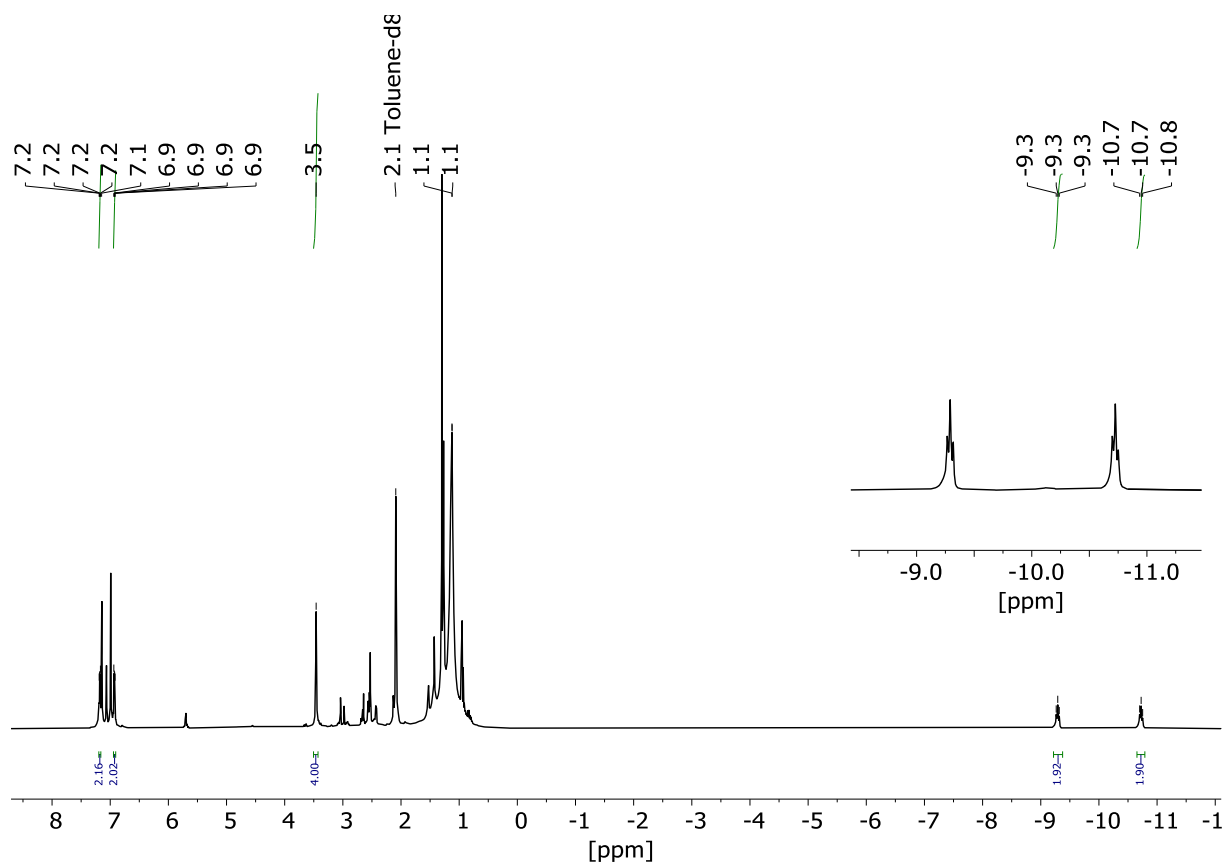

**Figure S 25.**  $^1\text{H}\{^{31}\text{P}\}$  NMR spectrum ( $\text{toluene-}d_8$ , 400 MHz, 203 K) of complex 4 after gas exchange with  $\text{D}_2$  at  $-78^\circ\text{C}$ .

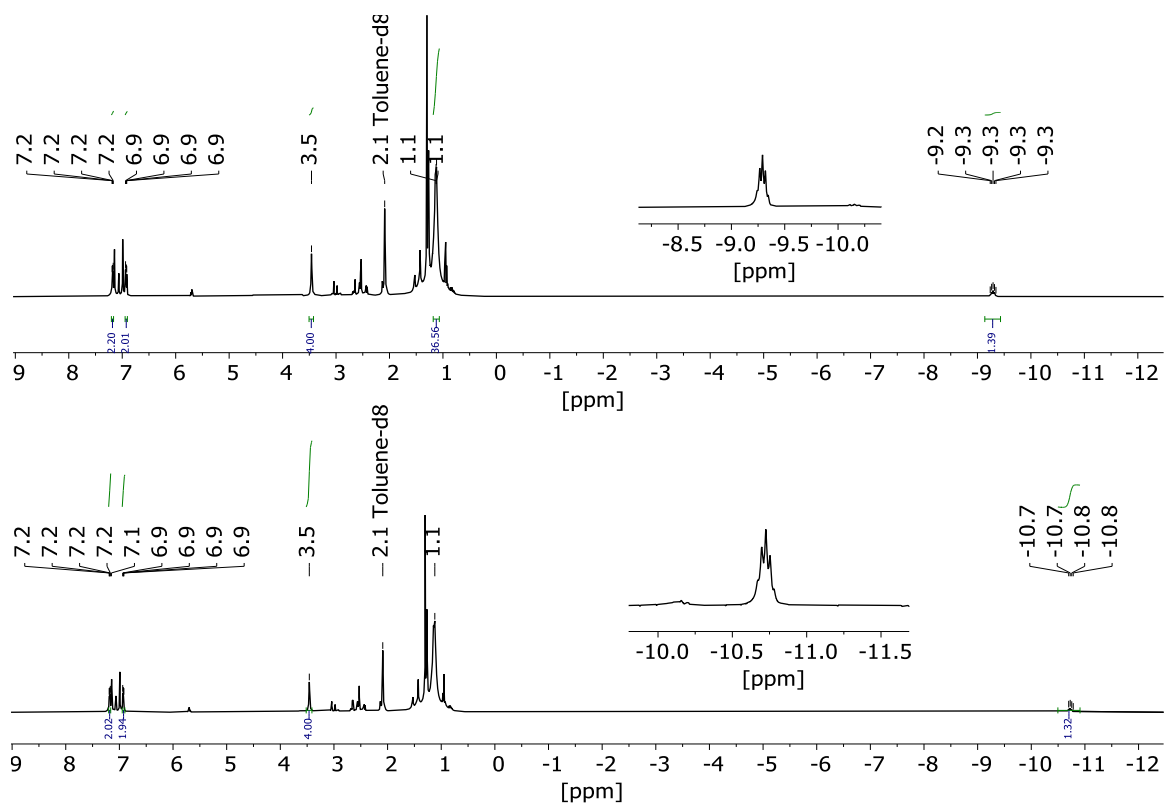

**Figure S 26.**  $^1\text{H}$  saturation transfer experiment ( $\text{toluene-}d_8$ , 400 MHz, 203 K) of the gas exchange reaction with  $\text{D}_2$  at  $-78^\circ\text{C}$  with complex **4**, performed at the hydride signals. Top: Presaturation at  $-10.74$  ppm. Bottom: Presaturation at  $-9.30$  ppm. In both cases, the intensity of the other hydride signal is clearly reduced. Selectivity of the saturation was proven by irradiation at  $-7.68$  ppm which has no effect.

### 3.6 Reaction of complex **1** with LiTMP and $\text{H}_2$

Complex **1** (24.8 mg,  $34.5\ \mu\text{mol}$ ) and LiTMP (1.05 eq., 1.61 mg,  $39.3\ \mu\text{mol}$ ) were dissolved in  $\text{toluene-}d_8$  (0.7 mL) in a Young-NMR-tube. The reaction mixture was degassed (three freeze-pump-thaw-cycles). Then the reaction mixture was frozen at  $-196^\circ\text{C}$ , evacuated, followed by purging with  $\text{H}_2$  gas. The mixture was then allowed to slowly warm to room temperature under vigorous stirring. This  $\text{H}_2$  purging cycle was repeated at least three times. Afterwards the reaction mixture was stirred at  $90^\circ\text{C}$  overnight. The colour of the reaction mixture turns from yellow to dark brown.  $^1\text{H}$  NMR monitoring of the reaction solution shows a broad singlet at  $-10.1$  ppm.



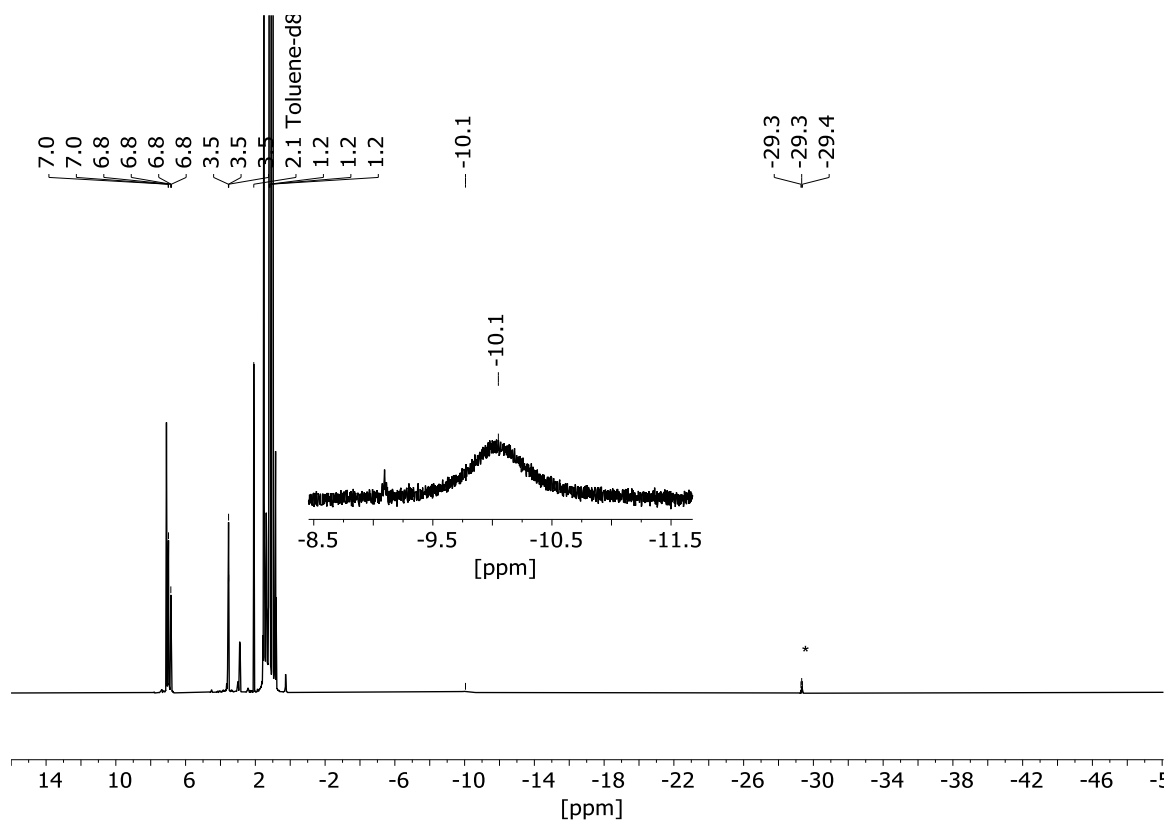

**Figure S 27.**  $^1\text{H}$  NMR spectrum (toluene- $d_8$ , 300 MHz, 298 K) of the reaction of complex **1** with LiTMP and  $\text{H}_2$ . \* complex **1**.

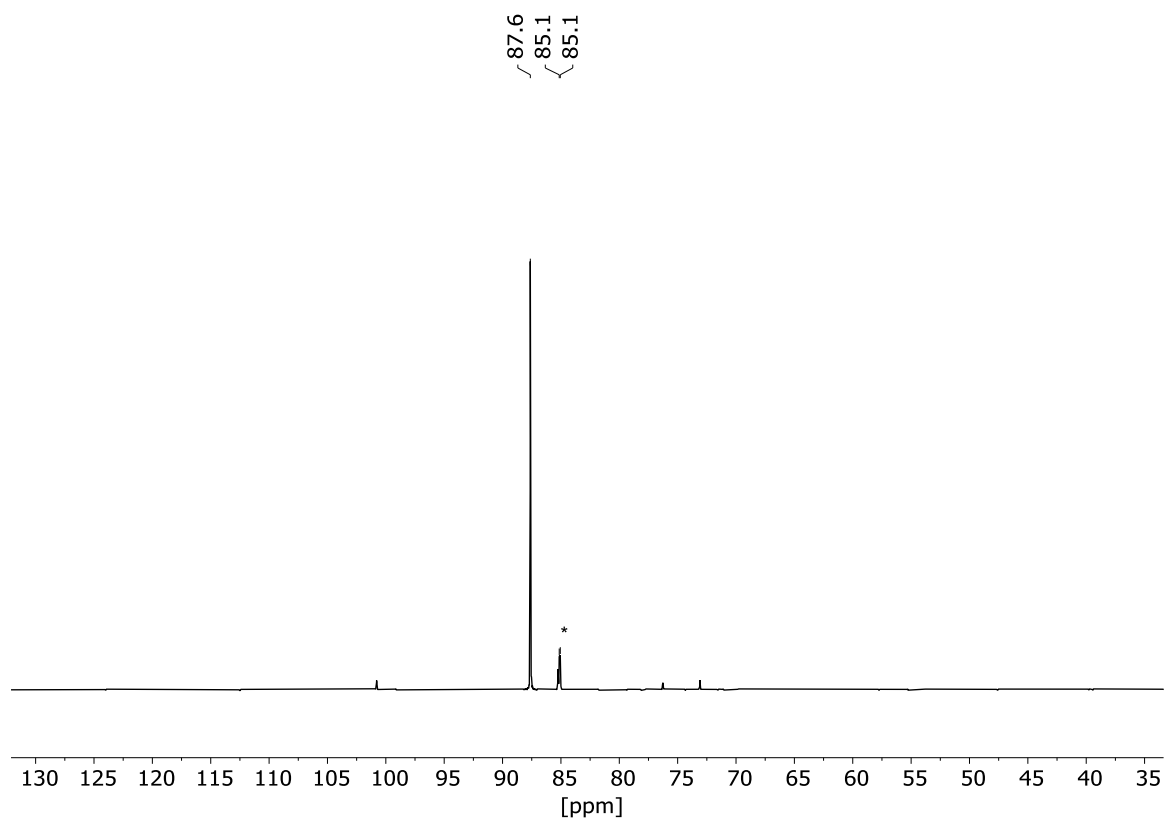

**Figure S 28.**  $^{31}\text{P}\{^1\text{H}\}$  NMR spectrum (toluene- $d_8$ , 122 MHz, 298 K) of the reaction of complex **1** with LiTMP and  $\text{H}_2$ . \* complex **1**.

### 3.7 Reaction of 1 (5 mol%) with H<sub>3</sub>B·NMeH<sub>2</sub>

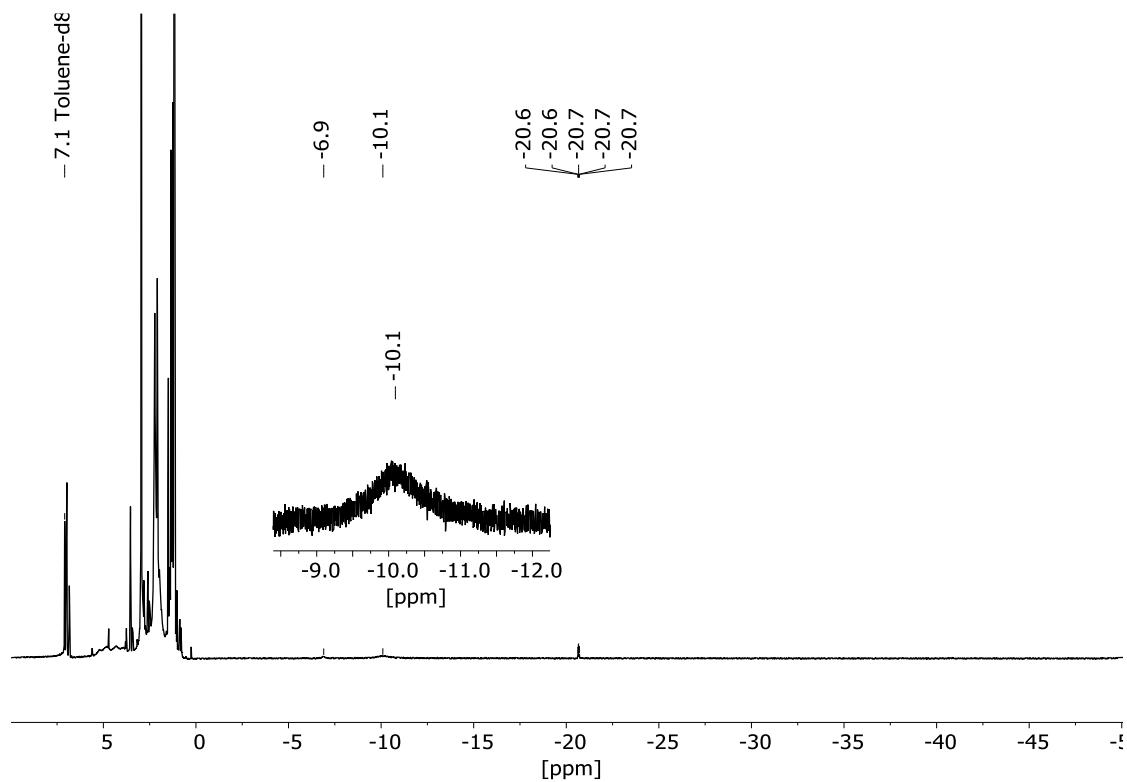

**Figure S 29.** <sup>1</sup>H NMR spectrum (toluene-d<sub>8</sub>, 300 MHz, 298 K) of the reaction of 1 (5 mol%) with H<sub>3</sub>B·NMeH<sub>2</sub>.

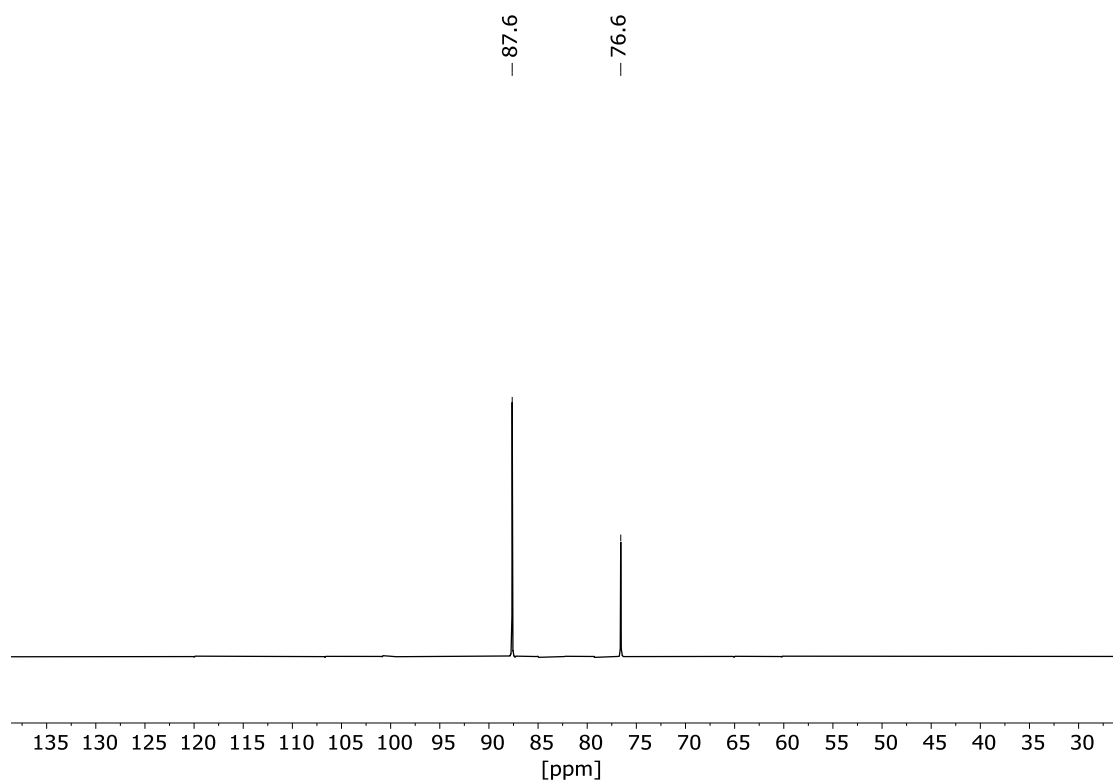

**Figure S 30.** <sup>31</sup>P{<sup>1</sup>H} NMR spectrum (toluene-d<sub>8</sub>, 122 MHz, 298 K) of the reaction of 1 (5 mol%) with H<sub>3</sub>B·NMeH<sub>2</sub>.

## 4 Dehydrocoupling of amine boranes

### 4.1 General procedure

H<sub>3</sub>B·NH<sub>3</sub> or H<sub>3</sub>B·NMeH<sub>2</sub> (1.33 mmol), NaO*t*Bu (1 mol%) and the corresponding precatalyst (1 mol%) were weighed into a three-necked reaction vessel. The reaction vessel was connected to an automatically operating gas buret<sup>8</sup> under Ar atmosphere. The gas buret was initialised, the solvent (THF or toluene, 10 mL) was added, and the data acquisition was started immediately. After the reaction, a gas sample was taken and analysed by TCD-GC to confirm the presence of H<sub>2</sub>. An aliquot was taken from the reaction mixture and analysed by NMR spectroscopy (<sup>1</sup>H, <sup>31</sup>P{<sup>1</sup>H}, <sup>11</sup>B, <sup>11</sup>B{<sup>1</sup>H}).

### 4.2 Overview of the catalytic conditions

**Table S 3.** Overview of the catalytic conditions for the dehydrocoupling of amine boranes.

| entry           | catalyst | c / mol% | substrate                          | solvent | reaction time / h | equivalent H <sub>2</sub> |
|-----------------|----------|----------|------------------------------------|---------|-------------------|---------------------------|
| 1               | <b>1</b> | 1.0      | H <sub>3</sub> B·NMeH <sub>2</sub> | toluene | 1.25              | 0.85                      |
| 2               | <b>1</b> | 2.0      | H <sub>3</sub> B·NMeH <sub>2</sub> | toluene | 0.20              | 0.92                      |
| 3               | <b>1</b> | 1.0      | H <sub>3</sub> B·NMeH <sub>2</sub> | THF     | 44.4              | 0.88                      |
| 4               | <b>1</b> | 2.0      | H <sub>3</sub> B·NMeH <sub>2</sub> | THF     | 88.5              | 0.94                      |
| 5 <sup>a</sup>  | <b>2</b> | 1.0      | H <sub>3</sub> B·NMeH <sub>2</sub> | toluene | 25.0              | 0.78                      |
| 6 <sup>a</sup>  | <b>3</b> | 1.0      | H <sub>3</sub> B·NMeH <sub>2</sub> | toluene | 12.5              | 0.90                      |
| 7 <sup>a</sup>  | <b>3</b> | 0.1      | H <sub>3</sub> B·NMeH <sub>2</sub> | toluene | 50.0              | 0.89                      |
| 8               | <b>1</b> | 1.0      | H <sub>3</sub> B·NH <sub>3</sub>   | THF     | 60.0              | 1.03                      |
| 9               | <b>1</b> | 1.0      | H <sub>3</sub> B·NH <sub>3</sub>   | toluene | 93.0              | 0.85                      |
| 10 <sup>a</sup> | <b>2</b> | 1.0      | H <sub>3</sub> B·NH <sub>3</sub>   | THF     | 45.0              | 0.53                      |

Reaction conditions: c(substrate) = 1.33 M, V(Solvent) = 10 mL, 1 eq. NaO*t*Bu.<sup>a</sup> Without the use of NaO*t*Bu.

### 4.3 Dehydrocoupling of H<sub>3</sub>B·NMeH<sub>2</sub>

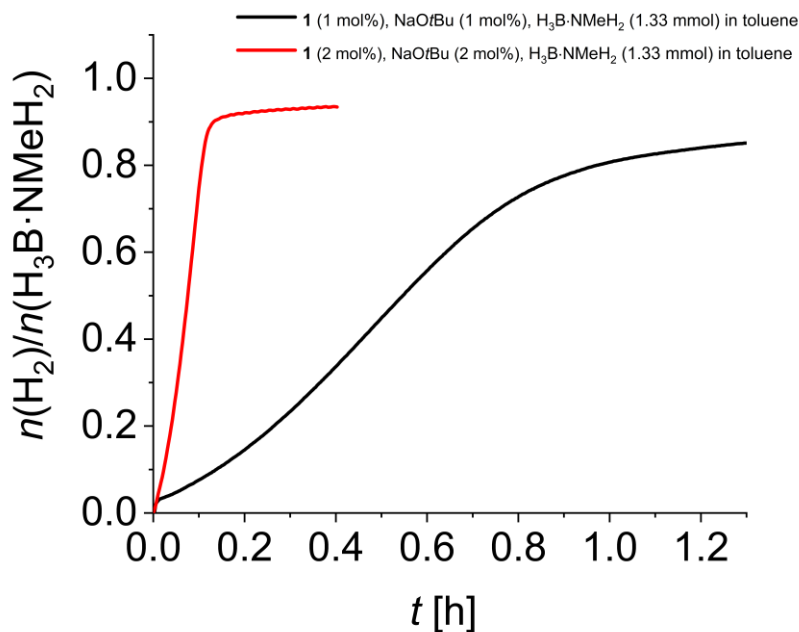

**Figure S 31.** Volumetric curves of the dehydrocoupling of H<sub>3</sub>B·NMeH<sub>2</sub> with complex **1** and NaOtBu.

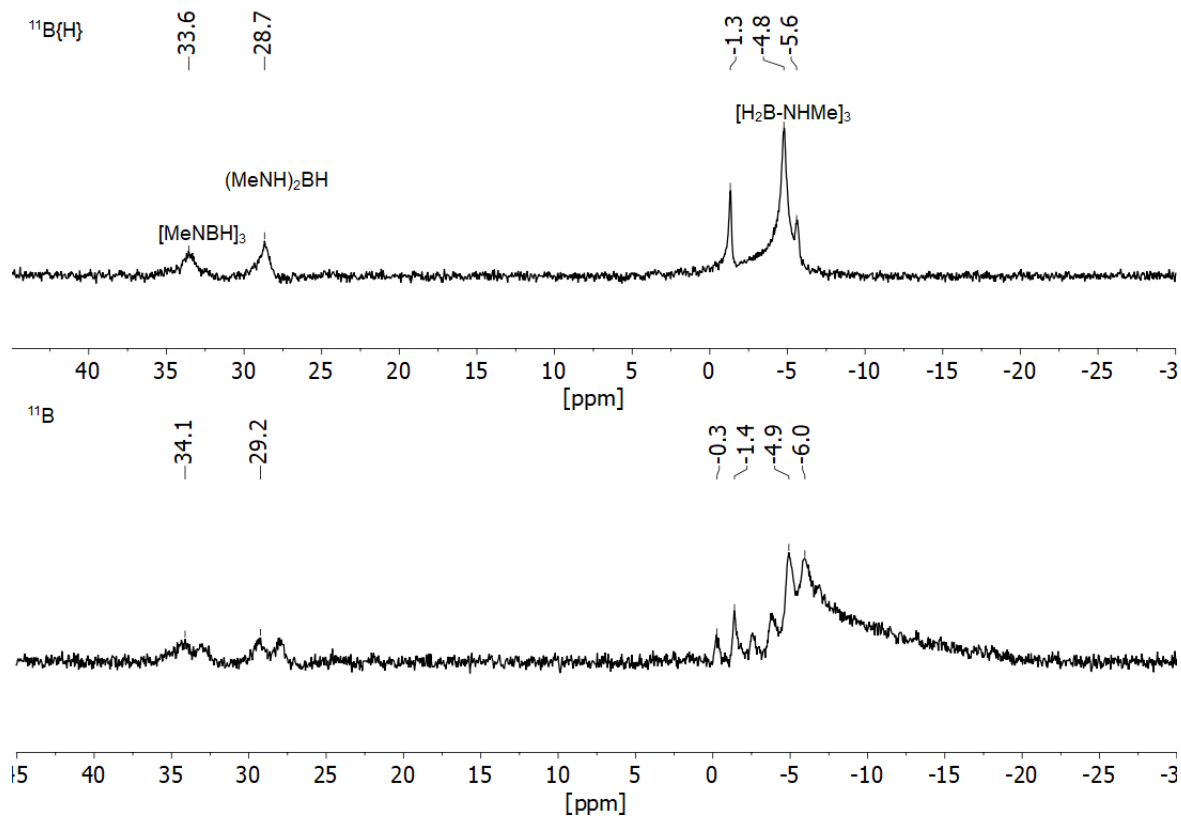

**Figure S 32.** <sup>11</sup>B{<sup>1</sup>H} and <sup>11</sup>B NMR spectra (96 MHz, toluene-*d*<sub>8</sub>) of dehydrocoupling of H<sub>3</sub>B·NMeH<sub>2</sub> with complex **1**. Conditions:  $T = 25^\circ\text{C}$ , toluene, 1 mol% NaOtBu, 1 mol% **1**.

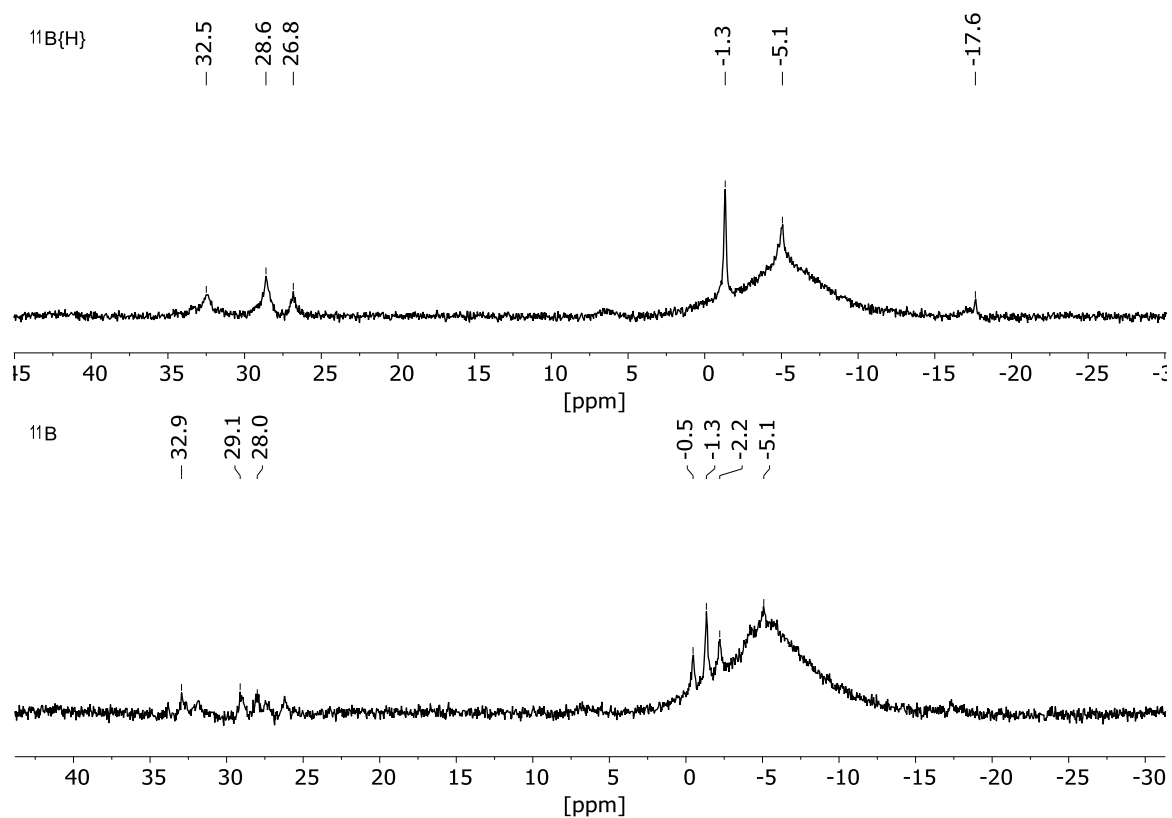

**Figure S 33.**  $^{11}\text{B}\{^1\text{H}\}$  and  $^{11}\text{B}$  NMR spectra (128 MHz, toluene- $d_8$ ) of dehydrocoupling of  $\text{H}_3\text{B}\cdot\text{NMeH}_2$  with complex **1**. Conditions:  $T = 25^\circ\text{C}$ , toluene, 2 mol%  $\text{NaOtBu}$ , 2 mol% **1**.

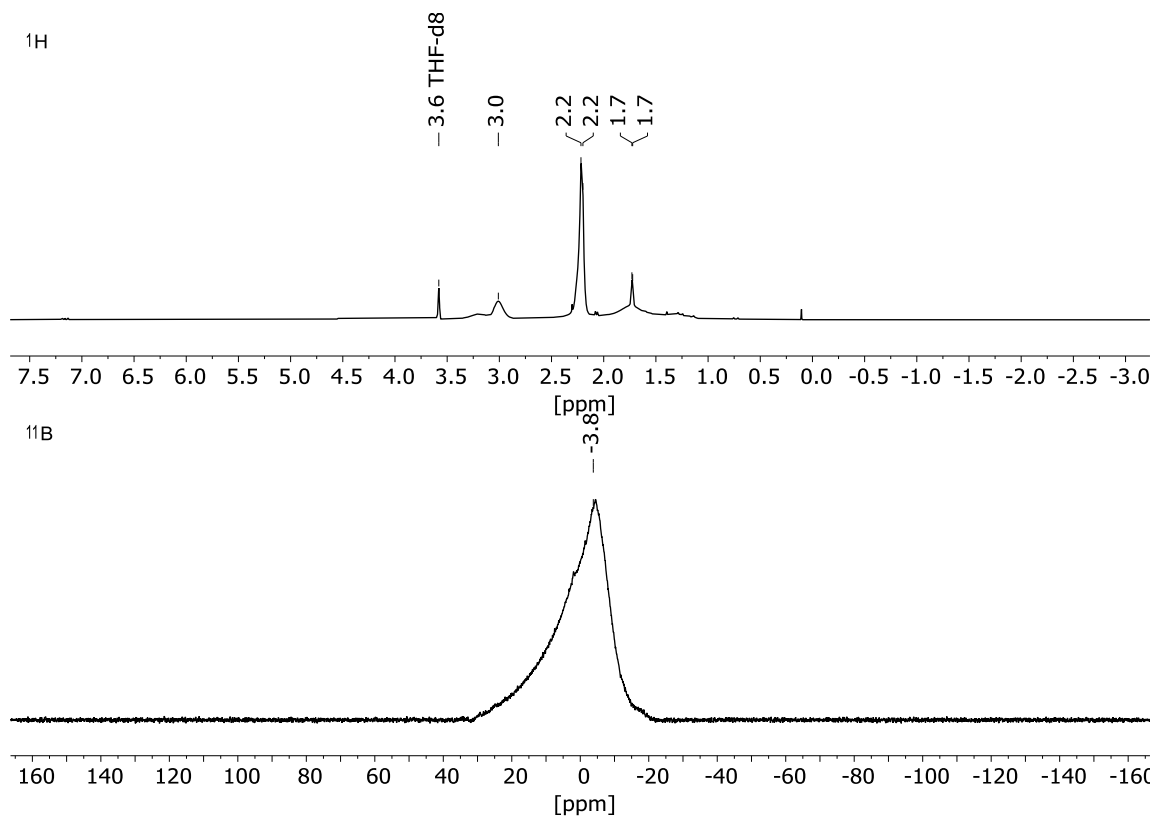

**Figure S 34.**  $^1\text{H}$  (300 MHz) and  $^{11}\text{B}$  NMR spectra (96 MHz) in THF- $d_8$  of isolated  $(\text{H}_2\text{B}\cdot\text{NMeH})_n$ . Conditions:  $T = 25^\circ\text{C}$ , toluene, 2 mol%  $\text{NaOtBu}$ , 2 mol% **1**.

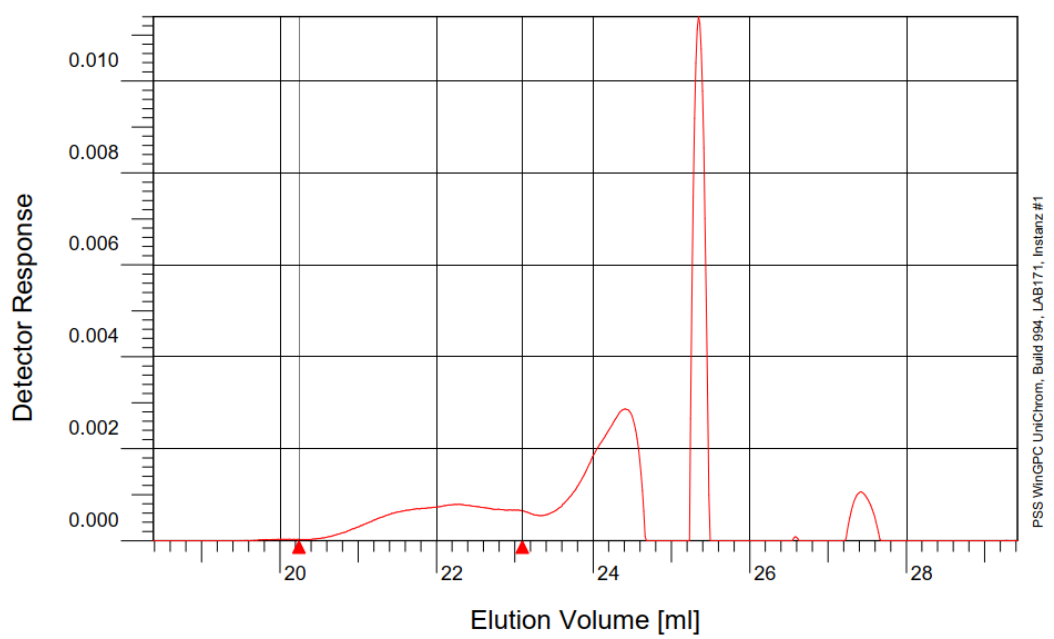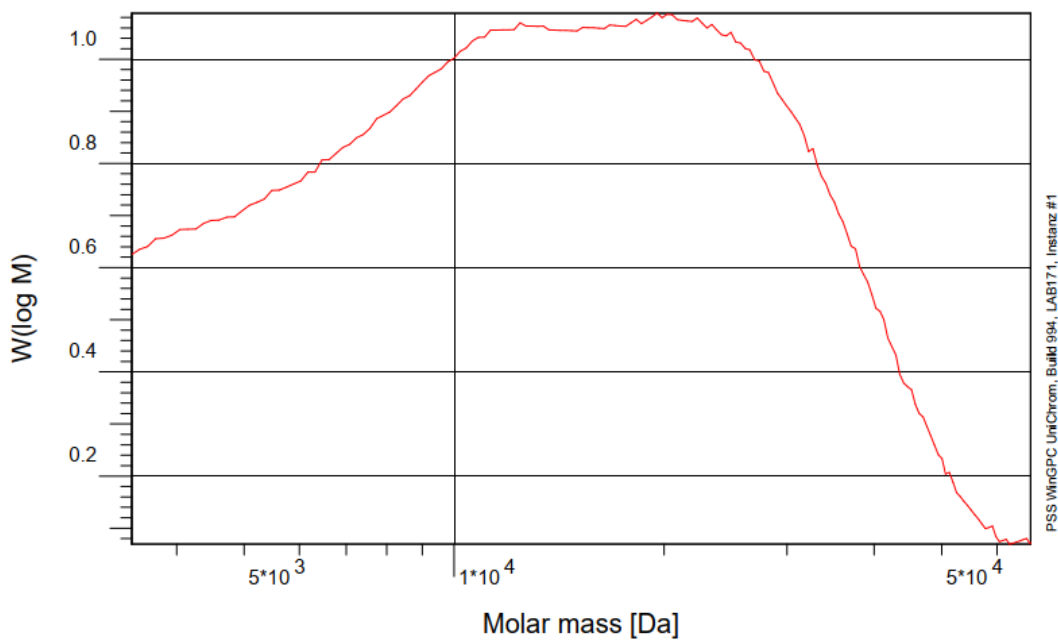

**Figure S 35.** SEC data of isolated polymer from the dehydropolymerisation of  $\text{H}_3\text{B}\cdot\text{NMeH}_2$  with 2 mol% **1**.

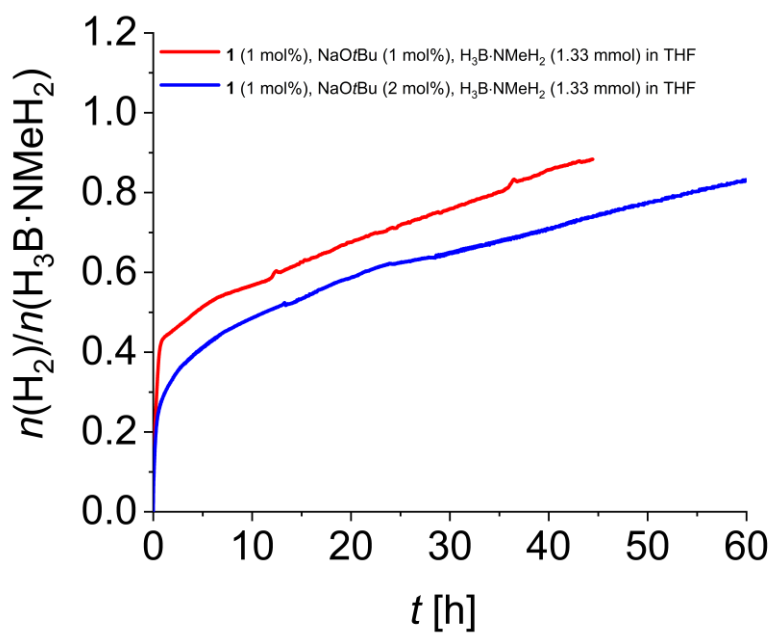

**Figure S 36.** Volumetric curve of the dehydrocoupling of  $\text{H}_3\text{B}\cdot\text{NMeH}_2$  with complex 1.

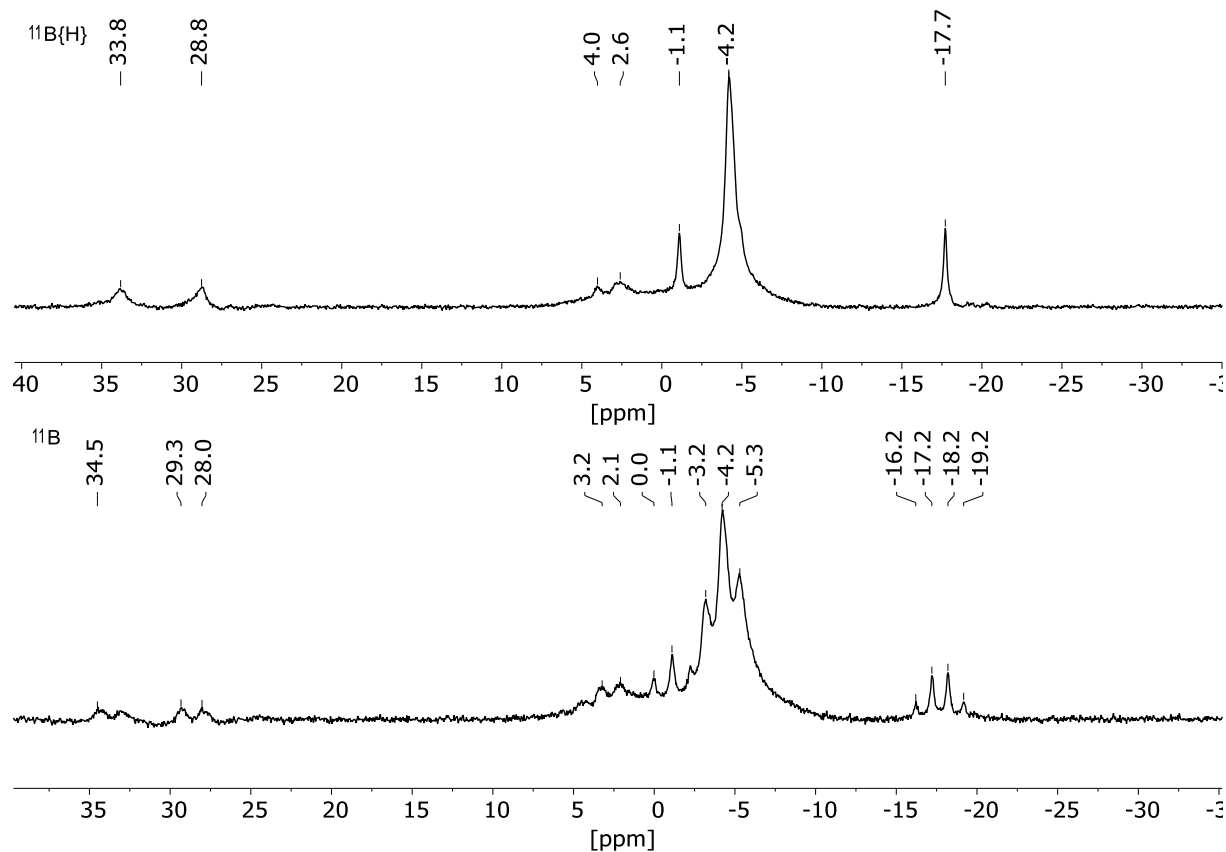

**Figure S 37.**  $^{11}\text{B}\{^1\text{H}\}$  and  $^{11}\text{B}$  NMR spectra (96 MHz,  $\text{THF-d}_6$ ) of dehydrocoupling of  $\text{H}_3\text{B}\cdot\text{NMeH}_2$  with complex 1. Conditions:  $T = 25^\circ\text{C}$ , THF, 1 mol% catalyst.

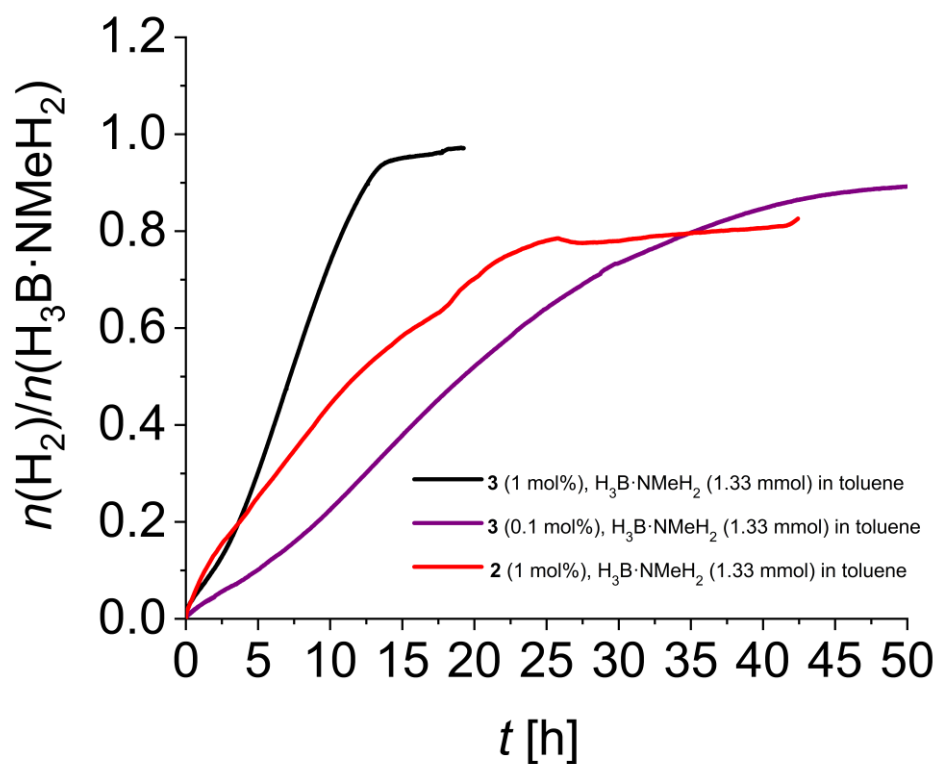

**Figure S 38.** Volumetric curves of the dehydrocoupling of  $\text{H}_3\text{B}\cdot\text{NMeH}_2$  with complex 2 and 3.

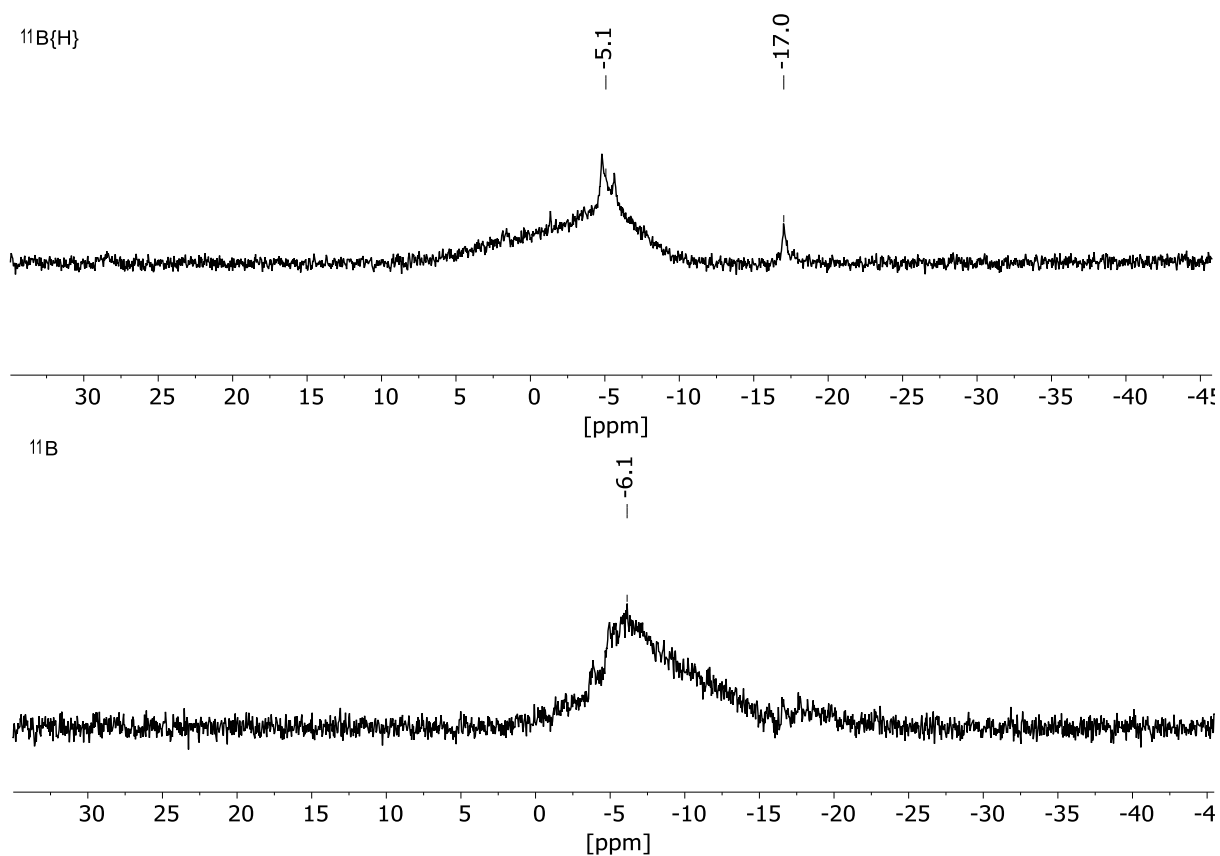

**Figure S 39.**  $^{11}\text{B}\{^1\text{H}\}$  and  $^{11}\text{B}$  NMR spectra (96 MHz, toluene- $d_8$ ) of dehydrocoupling of  $\text{H}_3\text{B}\cdot\text{NMeH}_2$  with complex 3. Conditions:  $T = 25^\circ\text{C}$ , toluene, 1 mol% catalyst.



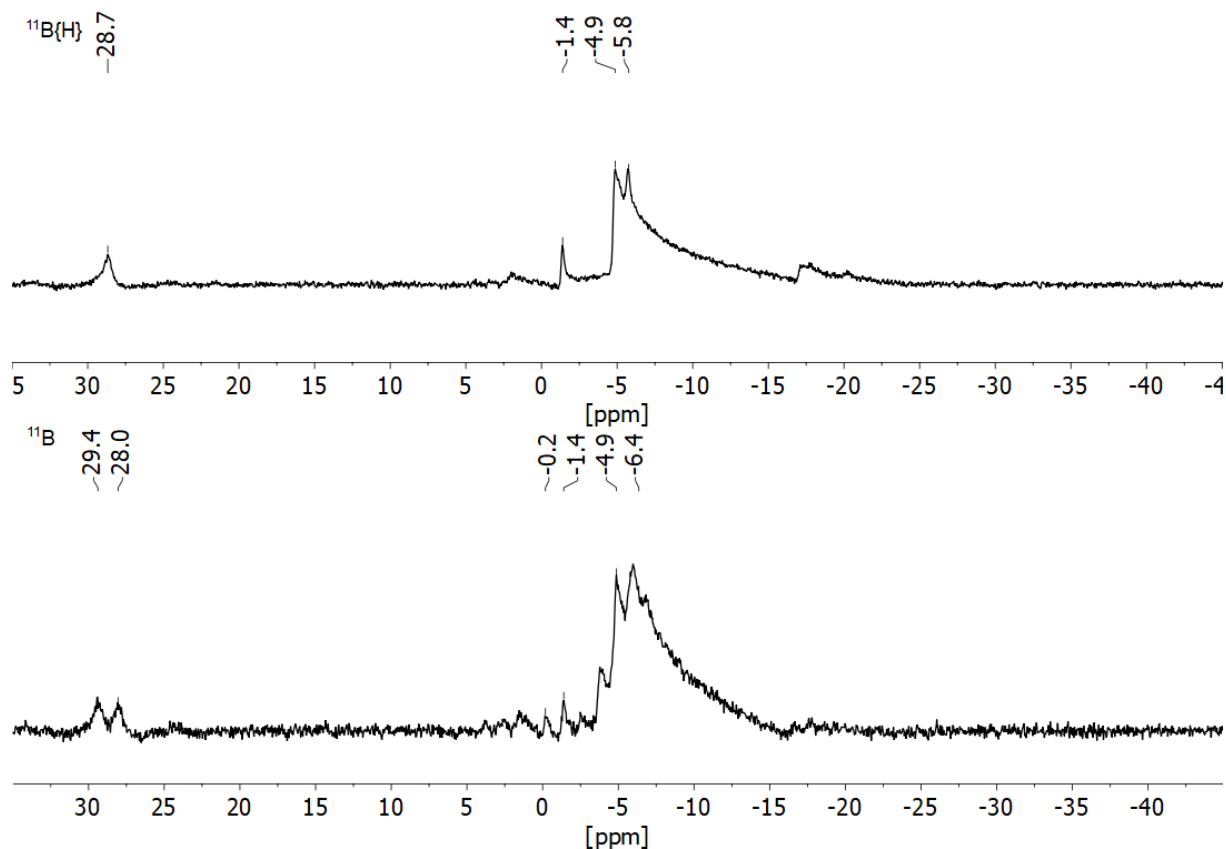

**Figure S 40.**  $^{11}\text{B}\{^1\text{H}\}$  and  $^{11}\text{B}$  NMR spectra (96 MHz, toluene- $d_8$ ) of dehydrocoupling of  $\text{H}_3\text{B}\cdot\text{NMeH}_2$  with complex **2**. Conditions:  $T = 25^\circ\text{C}$ , toluene, 1 mol% catalyst.

#### 4.4 Reactivity test of **2** for the dehydrocoupling of $\text{H}_3\text{B}\cdot\text{NMeH}_2$

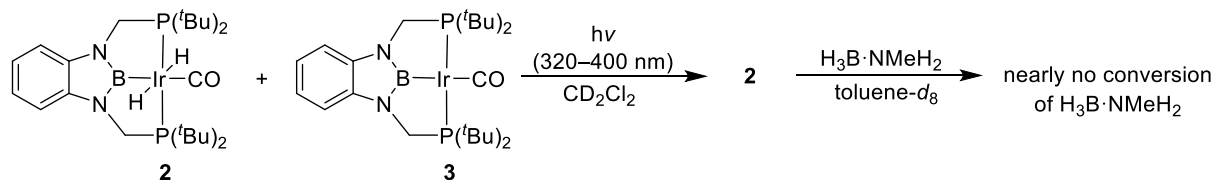

A mixture of complexes **2** and **3** (90:10) in  $\text{CD}_2\text{Cl}_2$  was irradiated at 320–400 nm in a Young-NMR tube for 20 minutes. The corresponding  $^{31}\text{P}\{^1\text{H}\}$  NMR spectra confirmed the photo-cleavage of complex **3** (Figure S 41) in solution. Afterwards, the solvent was removed in vacuum and toluene- $d_8$  (0.6 mL) was added, followed by the addition of  $\text{H}_3\text{B}\cdot\text{NMeH}_2$  (6.0 mg). The  $^{11}\text{B}$  and  $^{11}\text{B}\{^1\text{H}\}$  revealed almost no conversion of the substrate after 12 hours (Figure S 42).

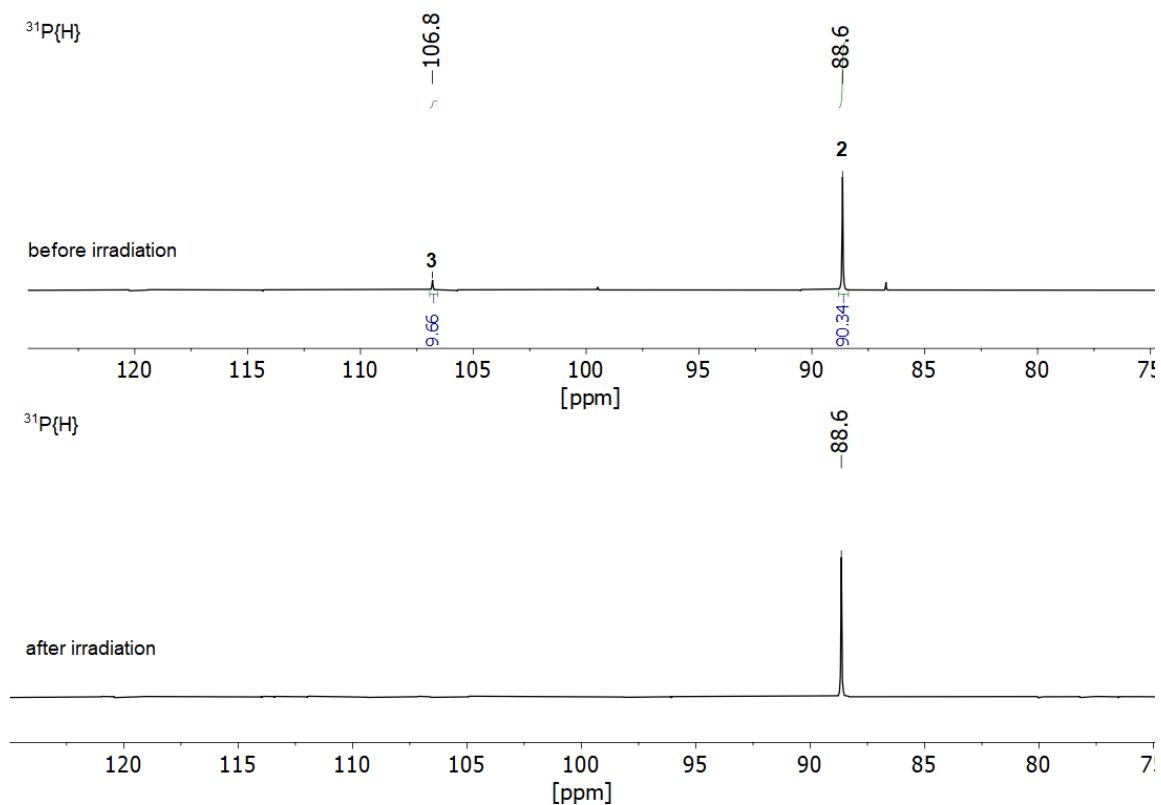

**Figure S 41.**  $^{31}\text{P}\{^1\text{H}\}$  NMR spectra ( $\text{CD}_2\text{Cl}_2$ , 122 MHz, 298 K) of a mixture of complexes **2** and **3**. Top: before irradiation ( $\lambda = 320\text{--}400\text{ nm}$ ). Bottom: after irradiation ( $t_{\text{total}} = 20\text{ min}$ ).

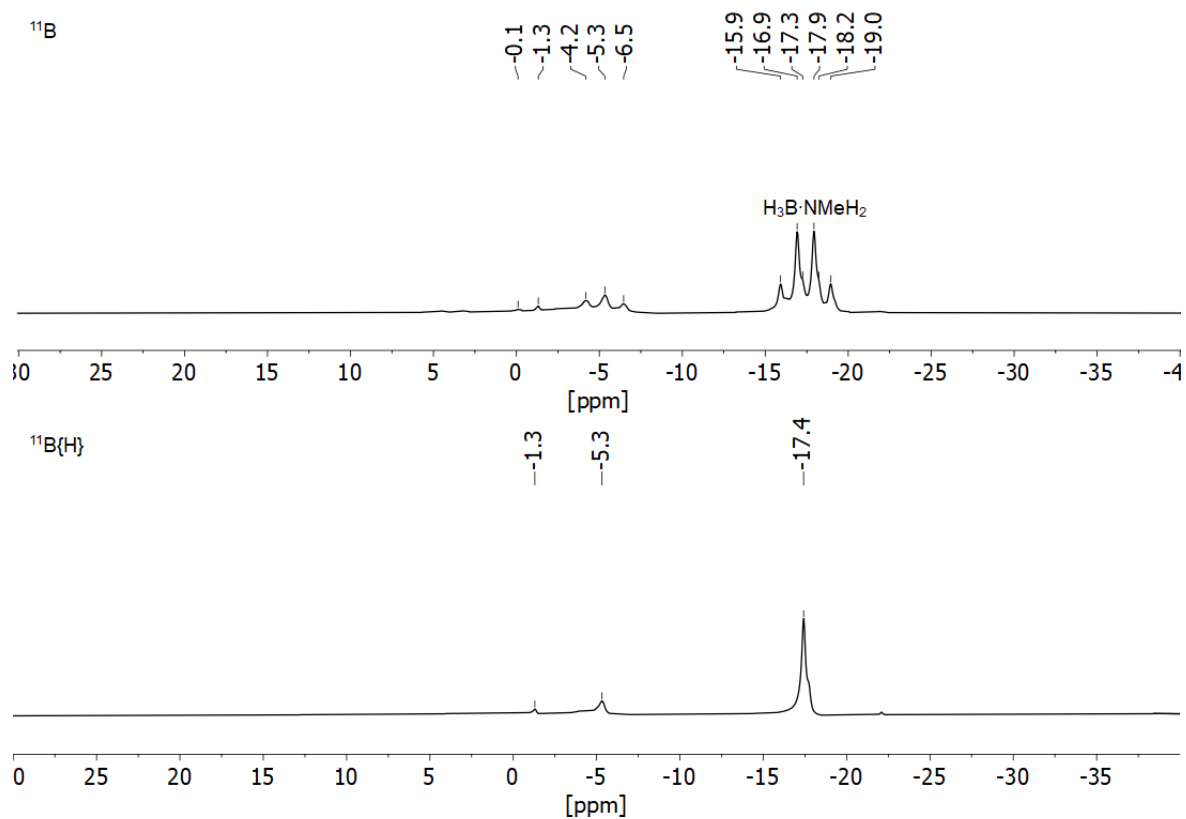

**Figure S 42.**  $^{11}\text{B}$  and  $^{11}\text{B}\{^1\text{H}\}$  NMR spectra (96 MHz,  $\text{toluene-}d_8$ ) of dehydrocoupling of  $\text{H}_3\text{B-NMeH}_2$  with complex **2** after photocleavage of **3**.

## 4.5 Dehydrocoupling of $\text{H}_3\text{B}\cdot\text{NH}_3$

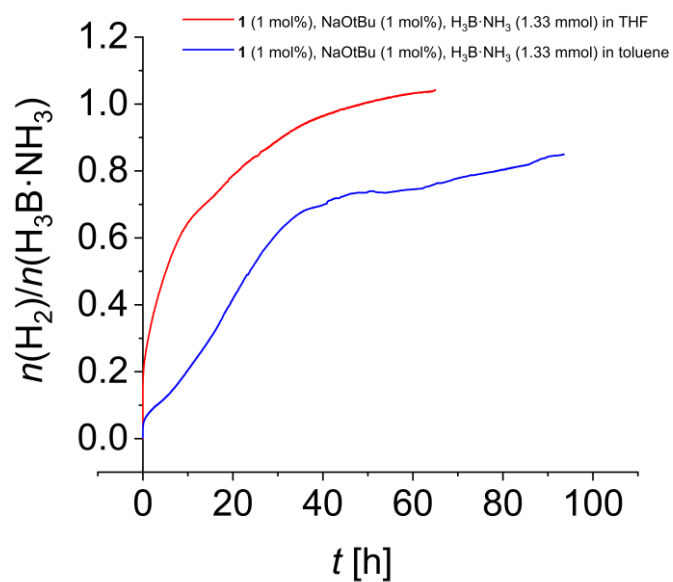

**Figure S 43.** Volumetric curves of the dehydrocoupling of  $\text{H}_3\text{B}\cdot\text{NH}_3$  with complex **1**.

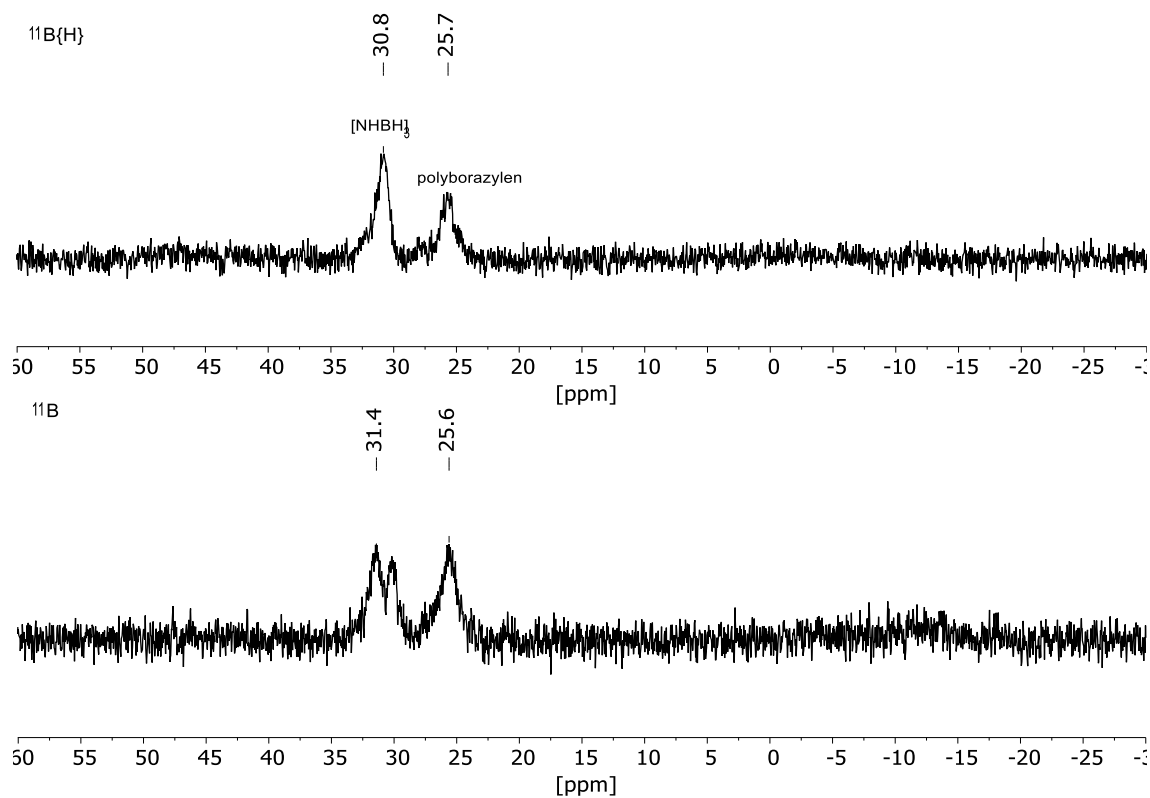

**Figure S 44.**  $^{11}\text{B}\{^1\text{H}\}$  and  $^{11}\text{B}$  NMR spectra (96 MHz,  $\text{THF}-d_8$ ) of dehydrocoupling of  $\text{H}_3\text{B}\cdot\text{NH}_3$  with complex **1**. Conditions:  $T = 25^\circ\text{C}$ , THF, 1 mol% catalyst.

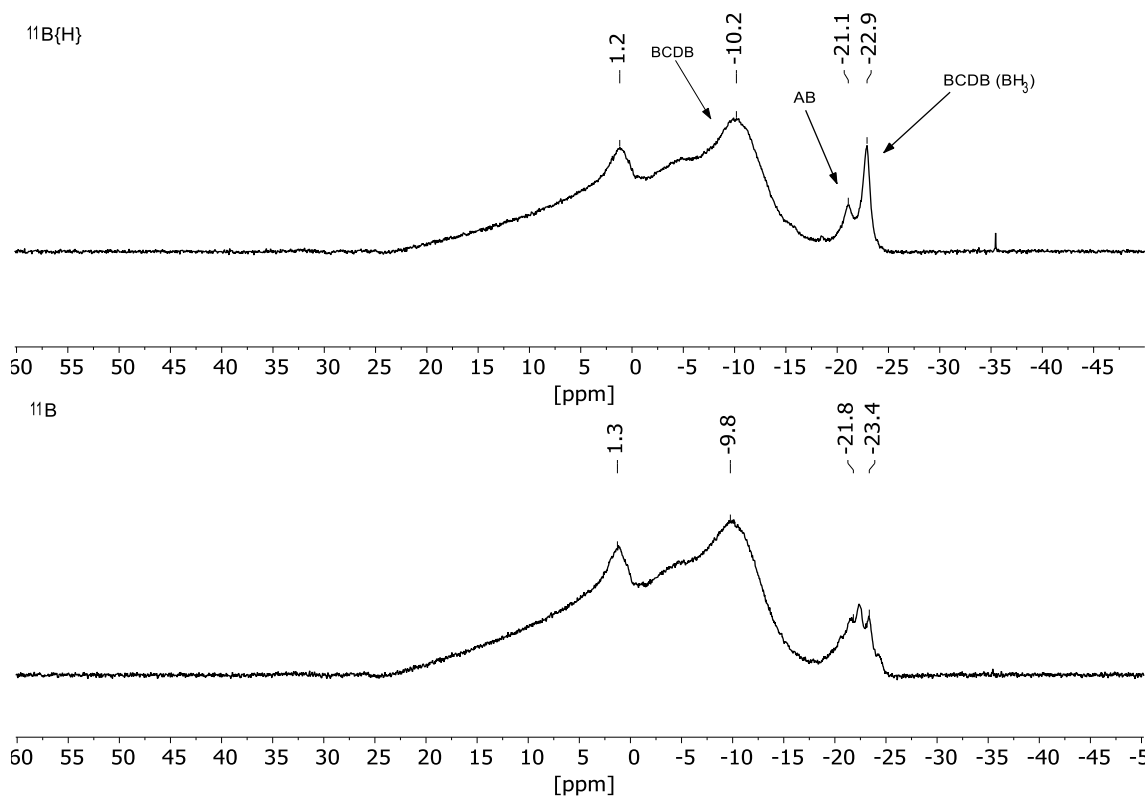

**Figure S 45.**  $^{11}\text{B}\{^1\text{H}\}$  and  $^{11}\text{B}$  NMR spectrum (96 MHz, DMSO- $d_6$ ) of dehydrocoupling of  $\text{H}_3\text{B}\cdot\text{NH}_3$  with complex **1** after work up. Conditions:  $T = 25^\circ\text{C}$ , THF, 1 mol% catalyst.

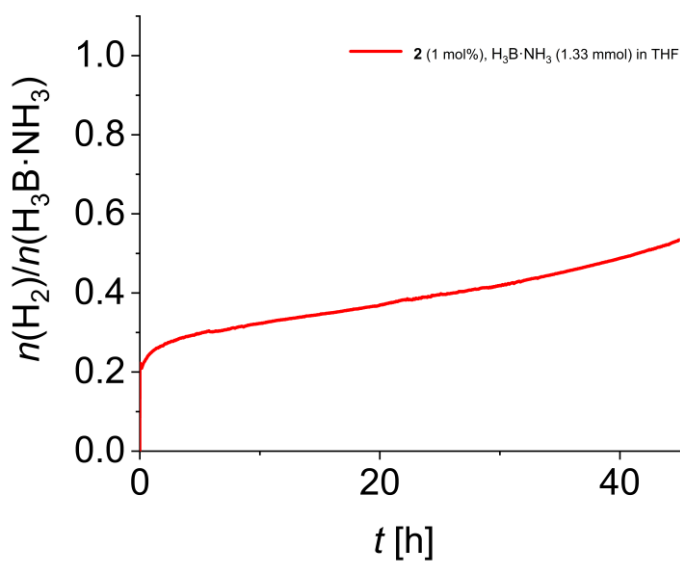

**Figure S 46.** Volumetric curve of the dehydrocoupling of  $\text{H}_3\text{B}\cdot\text{NH}_3$  with complex **2**.

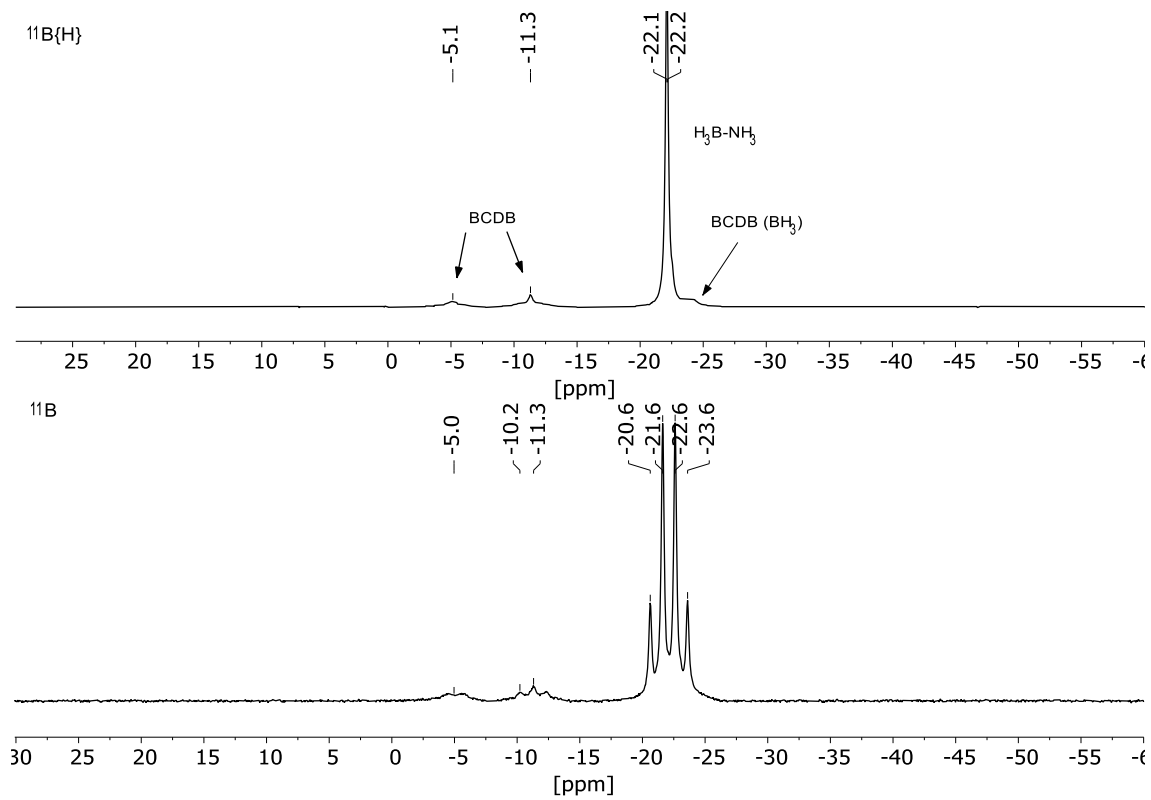

**Figure S 47.**  $^{11}\text{B}\{^1\text{H}\}$  and  $^{11}\text{B}$  NMR spectrum (96 MHz,  $\text{THF-d}_8$ ) of dehydrocoupling of  $\text{H}_3\text{B}\cdot\text{NH}_3$  with complex **2**. Conditions:  $T = 25^\circ\text{C}$ , THF, 1 mol% catalyst.

## 5 Computational Details

Computations were carried out using Gaussian 16<sup>9</sup>. In our calculations, we have used the real-size molecules. Calculations were carried out using hybrid functional density functional method B3LYP<sup>10-15</sup> in combination with basis set def2tzvp<sup>16</sup> and the empirical dispersion correction GD3BJ<sup>17, 18</sup>. All geometries were confirmed to be local minima or first order saddle points (for transition states, TS) on the potential energy surface by harmonic vibration frequency calculations on the same level of theory. Transition states were proofed to be correct by intrinsic reaction coordinate scans in both directions. For the visualisation of the charge density difference between the ground state and selected excited states as well as for QT-AIM<sup>19, 20</sup> and Laplacians-Plot Analysis we used MultiWfn 3.6 employing Gaussian16 formatted checkpoint files.<sup>21</sup> For the visualisation of 3D-quantum chemical results we used GaussView6.1.1<sup>22</sup> and Avogadro<sup>23, 24</sup>. In addition to the electronic supporting information we provide a multi-structure xyz-file including all calculated molecules. For a better understanding and a more intuitive view of the calculated 3D structures, we strongly recommend using this file e.g. with the free program MERCURY.<sup>25</sup>

*Please note that all computations were carried out for single, isolated molecules in the gas phase, if not otherwise noted (ideal gas approximation). There may well be significant differences between gas phase and condensed phase.*

**Table S 4. Summary of thermodynamic data of all calculated compounds.**

| Comp. label   | File-Name                                | Nimag | HF            | ZPE [kcal/mol] | H <sub>tot</sub> [a.u.] | G <sub>tot</sub> [a.u.] | Method      | Basisset | Calc     |
|---------------|------------------------------------------|-------|---------------|----------------|-------------------------|-------------------------|-------------|----------|----------|
| <b>2</b>      | t <sup>Bu</sup> PBPIr(H) <sub>2</sub> CO | 0     | -1977.966957  | 422.412660     | -1977.254478            | -1977.359510            | B3LYP/GD3BJ | def2tzvp | opt/freq |
|               | t <sup>Bu</sup> PBPIr(H) <sub>2</sub>    | 0     | -1864.540911  | 416.184820     | -1863.840140            | -1863.942443            | B3LYP/GD3BJ | def2tzvp | opt/freq |
| <b>3</b>      | t <sup>Bu</sup> PBPIr(CO)                | 0     | -1976.761654  | 411.473630     | -1976.066455            | -1976.173802            | B3LYP/GD3BJ | def2tzvp | opt/freq |
| <b>int1</b>   | PBPIrH4_iso2xray_b3lyp_opt_freq_tzvp.out | 0     | -1865.7421097 | 427.42039      | -1865.023388            | -1865.124840            | B3LYP/GD3BJ | def2tzvp | opt/freq |
| <b>int3</b>   | PBPIrH4_iso1_b3lyp_opt_freq_tzvp.out     | 0     | -1865.7405711 | 426.46881      | -1865.022835            | -1865.124493            | B3LYP/GD3BJ | def2tzvp | opt/freq |
| <b>int1</b>   | PBPIrH4_iso2_b3lyp_opt_freq_tzvp.out     | 0     | -1865.7421097 | 427.42390      | -1865.023383            | -1865.124833            | B3LYP/GD3BJ | def2tzvp | opt/freq |
| <b>int1_1</b> | PBPIrH4_iso2_2_opt_freq_tzvp.out         | 0     | -1865.7421097 | 427.42396      | -1865.023383            | -1865.124834            | B3LYP/GD3BJ | def2tzvp | opt/freq |
| <b>int2</b>   | PBPIrH4_iso3_b3lyp_opt_freq_tzvp.out     | 0     | -1865.7297392 | 426.63010      | -1865.011766            | -1865.113813            | B3LYP/GD3BJ | def2tzvp | opt/freq |
|               | PBPIrH4_iso3_2_b3lyp_opt_freq_tzvp.out   | 0     | -1865.7421097 | 427.42203      | -1865.023384            | -1865.124843            | B3LYP/GD3BJ | def2tzvp | opt/freq |
| <b>TS5</b>    | PBPIrH4_TS1_b3lyp_opt_freq_tzvp-1.out    | 1     | -1865.7385889 | 426.21145      | -1865.021703            | -1865.122481            | B3LYP/GD3BJ | def2tzvp | opt/freq |
| <b>TS4</b>    | PBPIrH4_TS2_b3lyp_opt_freq_tzvp.out      | 1     | -1865.7338617 | 425.32428      | -1865.018344            | -1865.119321            | B3LYP/GD3BJ | def2tzvp | opt/freq |
|               | PBPIrH4_TS3_b3lyp_opt_freq_tzvp.out      | 1     | -1865.7288988 | 425.52371      | -1865.012970            | -1865.114261            | B3LYP/GD3BJ | def2tzvp | opt/freq |
| <b>TS2</b>    | PBPIrH4_TS3_2_b3lyp_opt_freq_tzvp.out    | 1     | -1865.7302877 | 425.51275      | -1865.014429            | -1865.115628            | B3LYP/GD3BJ | def2tzvp | opt/freq |
| <b>TS1</b>    | PBPIrH4_TS4_b3lyp_opt_freq_tzvp2.out     | 1     | -1865.7401797 | 426.23189      | -1865.023487            | -1865.124352            | B3LYP/GD3BJ | def2tzvp | opt/freq |
| <b>TS3</b>    | PBPIrH4_TS5_b3lyp_opt_freq_tzvp.out      | 1     | -1865.7219982 | 426.69645      | -1865.00422             | -1865.105651            | B3LYP/GD3BJ | def2tzvp | opt/freq |
| <b>TS5_Cs</b> | PBPIrH4_TS1_Cs_b3lyp_opt_freq_tzvp.out   | 1     | -1865.7384428 | 426.11433      | -1865.021651            | -1865.122919            | B3LYP/GD3BJ | def2tzvp | opt/freq |

## 5.1 IR spectra of $[(^t\text{BuPBP})\text{Ir}(\text{H})_2(\text{CO})]$ (**2**)

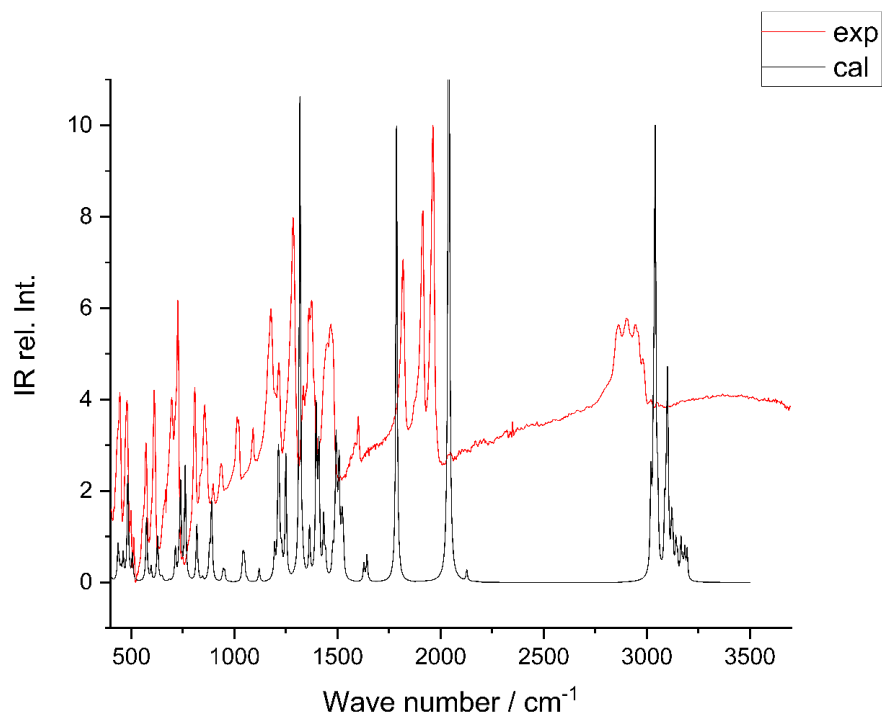

**Figure S 48.** Calculated (black, B3LYP/GD3BJ/def2tzvp) and experimental (red) IR spectra of complex **2**.

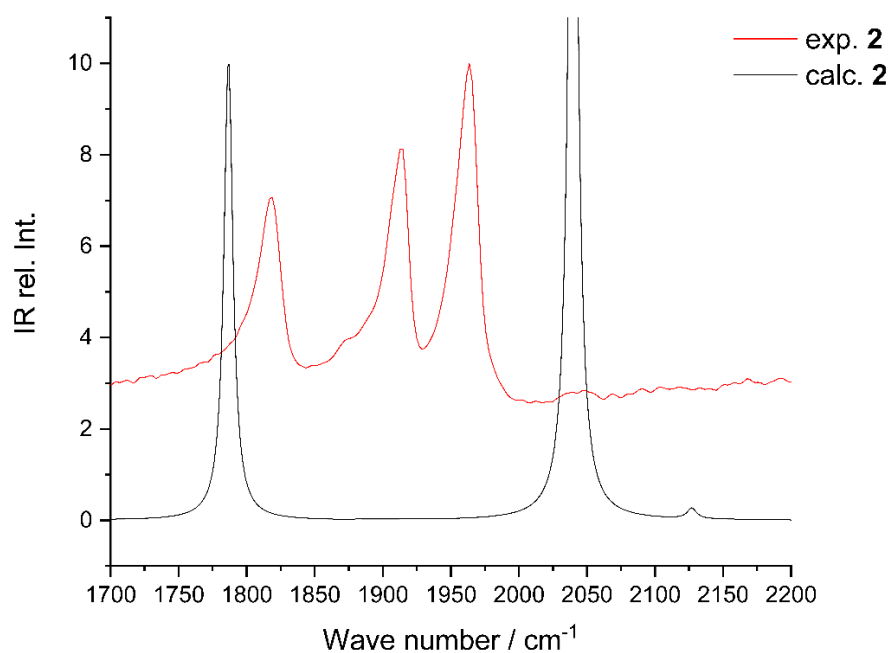

**Figure S 49.** Calculated (black, B3LYP/GD3BJ/def2tzvp) and experimental (red) IR spectra of complex **2**. Experimental:  $\tilde{\nu}$  2037.0  $\text{cm}^{-1}$  (Ir-H), 1963.6  $\text{cm}^{-1}$  (Ir-CO), 1818.8  $\text{cm}^{-1}$  (Ir-H). Calculated:  $\tilde{\nu}_{\text{cal}}$  2127  $\text{cm}^{-1}$  (Ir-H),  $\tilde{\nu}_{\text{cal}}$  2040  $\text{cm}^{-1}$  (Ir-CO),  $\tilde{\nu}_{\text{cal}}$  1787  $\text{cm}^{-1}$  (Ir-H); Note:  $\tilde{\nu}$  1912.6  $\text{cm}^{-1}$  (Ir-CO) of **3**.



## 5.2 Calculated IR spectra of $[(^t\text{BuPBP})\text{Ir}(\text{CO})]$ (**3**)

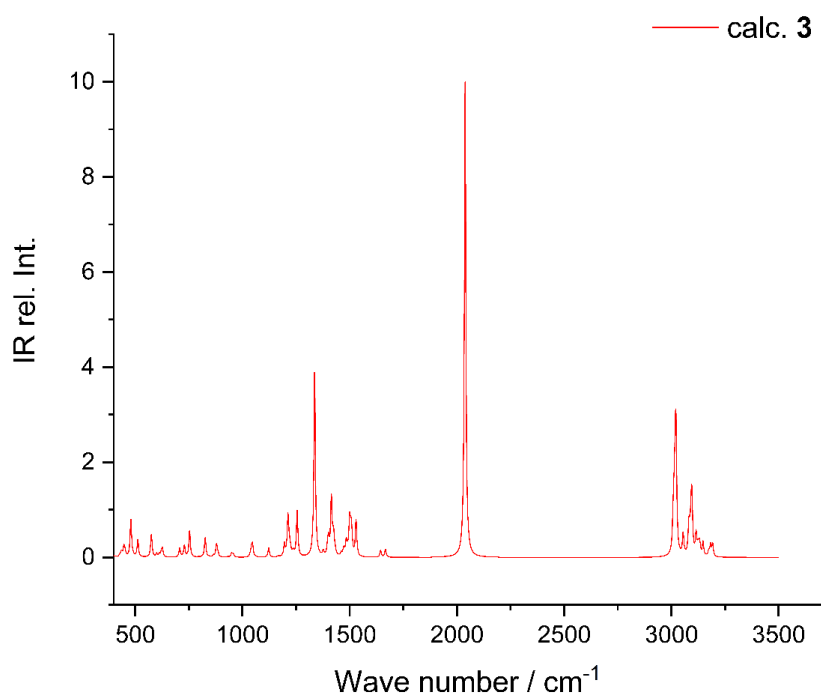

**Figure S 50.** Calculated (B3LYP/GD3BJ/def2tzvp) IR spectra of complex **3**,  $\tilde{\nu}_{\text{calc.}} 2001 \text{ cm}^{-1}$  (Ir-CO).

### 5.3 Calculated UV/VIS spectra of $[(^t\text{BuPBP})\text{Ir}(\text{H})_2(\text{CO})]$ (**2**)

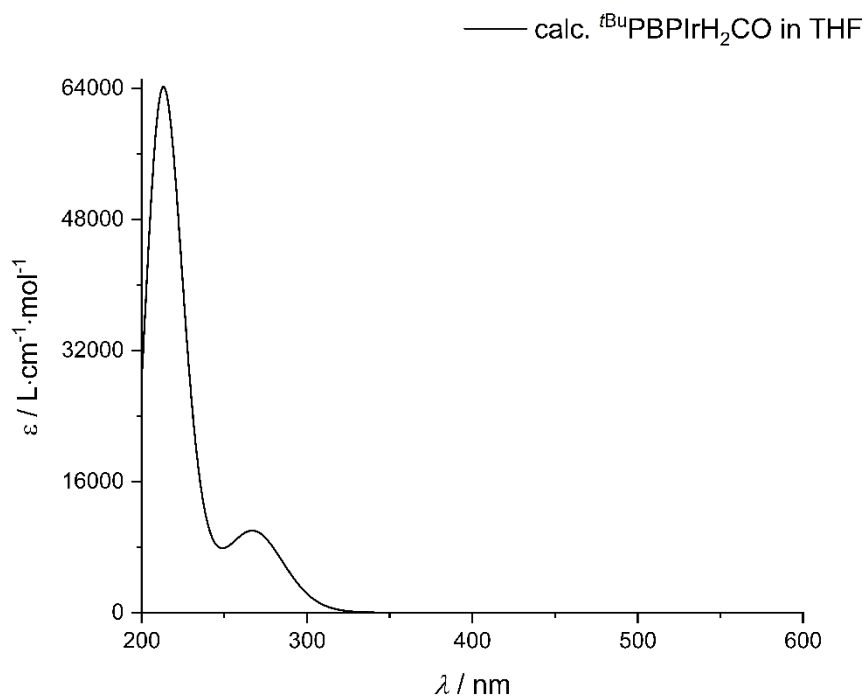

**Figure S 51.** Calculated (B3LYP/GD3BJ/def2tzvp) UV/VIS spectra of complex **2** with solvent correction in THF.

### 5.4 Calculated UV/VIS spectra of $^t\text{BuPBPIr}(\text{CO})$ (**3**)

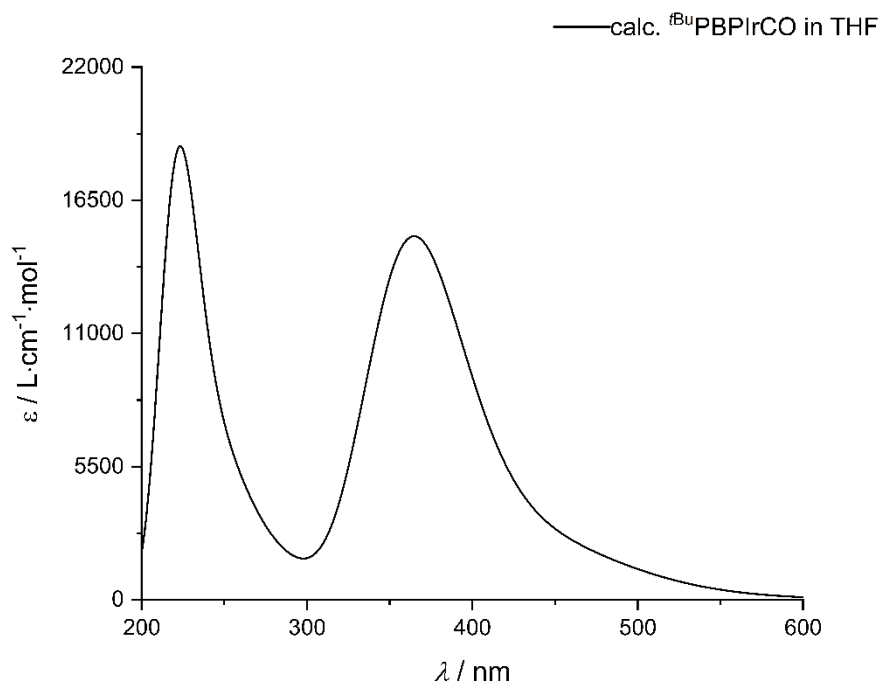

**Figure S 52.** Calculated (B3LYP/GD3BJ/def2tzvp) UV/VIS spectra of complex **3** with solvent correction in THF.

### Excitation energies and oscillator strengths:

Excited State 3: Singlet-A 3.4118 eV 363.40 nm  $f=0.2904$   $\langle S^{*2} \rangle=0.000$

129 -> 135 0.10197

133 -> 135 0.68617

Excited State 30: Singlet-A 5.6289 eV 220.26 nm  $f=0.3088$   $\langle S^{*2} \rangle=0.000$

129 -> 136 0.41690

130 -> 137 -0.34891

131 -> 137 0.20435

131 -> 138 0.19383

133 -> 136 0.16445

133 -> 141 -0.16388

133 -> 146 -0.11401

**Table S 5.** Orbital contour plot of the excited state 3 (363.4 nm) of <sup>t</sup>BuPBPIr(CO).

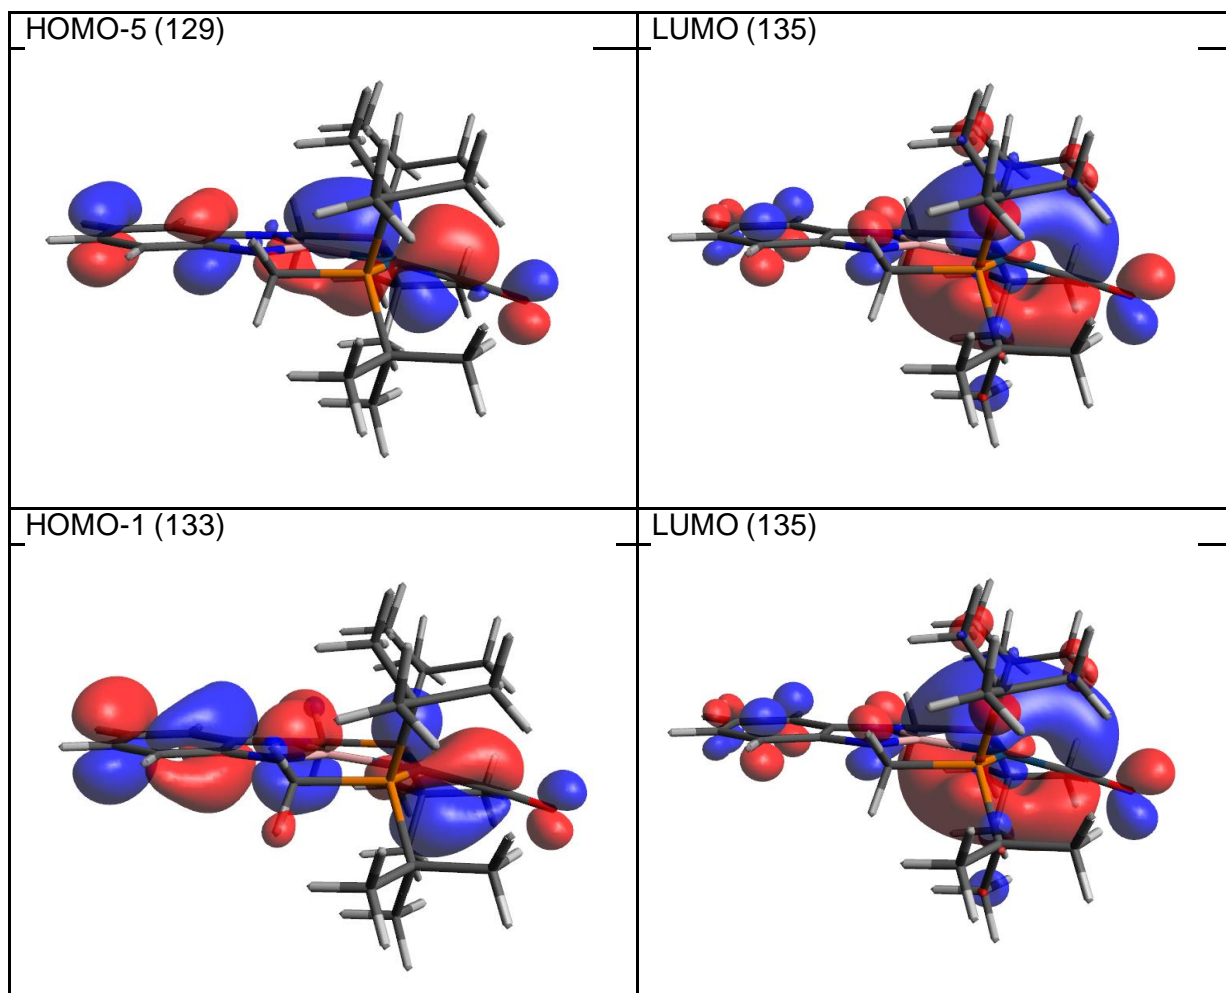

## 5.5 Charge density difference

**Table S 6.** Charge density contour plot of complex **3** at the excited state 3 (363.4 nm).

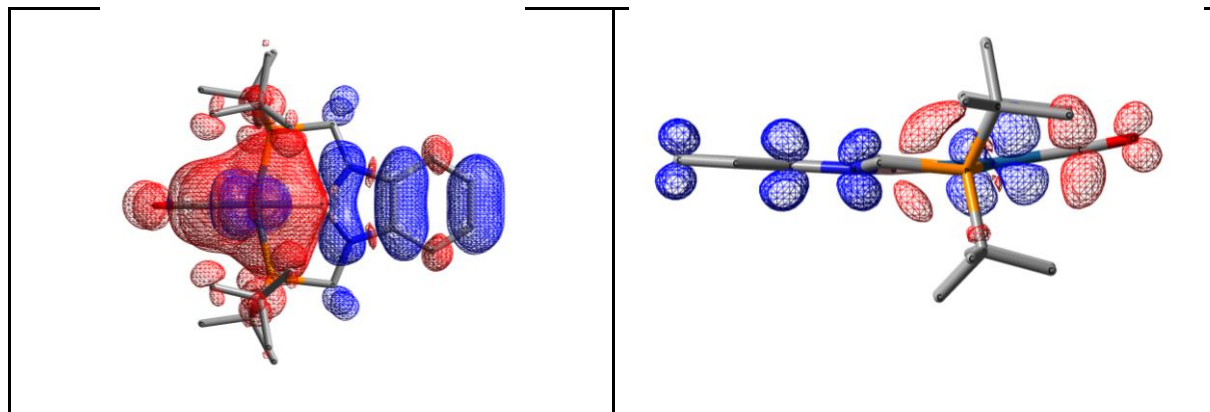

## 5.6 Theoretical investigation of [(<sup>t</sup>BuPBP)Ir(H)<sub>4</sub>] (**4**)

In this chapter, we summarise the results of our DFT calculations performed at the B3LYP/GD3BJ/def2tzvp level of theory in terms of the energy difference of all isomeric structures of tetrahydride complex **4** considered. Previous studies showed that the potential energy surface of such iridium tetrahydride and/or dihydrogen/dihydride complexes is very low. Noteworthy to mention that Goldman, Krogh-Jespersen *et. al.*<sup>26</sup> revealed a slight shift of the energy surface of [(POCOP)Ir(H)<sub>4</sub>] pincer complex when considering a solvent correction but only small differences in energy between the considered isomers were reported. This agrees well with our calculations. It should be mentioned that these small differences are below the error of the calculations and should therefore be discussed with caution. A detailed analysis of the data can be found in the manuscript.

**Table S 7.** Summary of calculated thermodynamic data for the *trans*-pathway of the tetrahydride dihydrogen/dihydride exchange of complex **4**.

| Comp. Label | Calc. label                              | $\Delta_R H$ [kJ/mol] | $\Delta_R G$ [kJ/mol] | $\Delta_R H$ [kcal/mol] | $\Delta_R G$ [kcal/mol] |
|-------------|------------------------------------------|-----------------------|-----------------------|-------------------------|-------------------------|
| int1_2      | PBPIrH4_iso2_2_opt_freq_tzvp.out         | 0.0                   | 0.0                   | 0.0                     | 0.0                     |
| TS1         | PBPIrH4_TS4_b3lyp_opt_freq_tzvp.out      | -0.3                  | 1.3                   | -0.1                    | 0.3                     |
| int1        | PBPIrH4_iso2xray_b3lyp_opt_freq_tzvp.out | 0.0                   | 0.0                   | 0.0                     | 0.0                     |
| TS4         | PBPIrH4_TS2_b3lyp_opt_freq_tzvp.out      | 13.2                  | 14.5                  | 3.2                     | 3.5                     |
| int3        | PBPIrH4_iso1_b3lyp_opt_freq_tzvp.out     | 1.5                   | 0.9                   | 0.3                     | 0.2                     |
| TS5         | PBPIrH4_TS1_Cs_b3lyp_opt_freq_tzvp.out   | 4.4                   | 6.2                   | 1.1                     | 1.5                     |
| int3_2      | PBPIrH4_iso1_b3lyp_opt_freq_tzvp.out     | 1.5                   | 0.9                   | 0.3                     | 0.2                     |

**Table S 8.** Summary of calculated thermodynamic data for the *cis*-pathway of the tetrahydride dihydrogen/dihydride exchange of complex **4**.

| Comp. Label | Calc. label                              | $\Delta_R H$ [kJ/mol] | $\Delta_R G$ [kJ/mol] | $\Delta_R H$ [kcal/mol] | $\Delta_R G$ [kcal/mol] |
|-------------|------------------------------------------|-----------------------|-----------------------|-------------------------|-------------------------|
| int1        | PBPIrH4_iso2xray_b3lyp_opt_freq_tzvp.out | 0.0                   | 0.0                   | 0.0                     | 0.0                     |
| TS2         | PBPIrH4_TS3_2_b3lyp_opt_freq_tzvp.out    | 23.5                  | 24.2                  | 5.6                     | 5.8                     |
| int2        | PBPIrH4_iso3_b3lyp_opt_freq_tzvp.out     | 30.5                  | 29.0                  | 7.3                     | 6.9                     |
| TS3         | PBPIrH4_TS5_b3lyp_opt_freq_tzvp.out      | 50.3                  | 50.4                  | 12.0                    | 12.0                    |
| int2_2      | PBPIrH4_iso3_b3lyp_opt_freq_tzvp.out     | 30.5                  | 29.0                  | 7.3                     | 6.9                     |

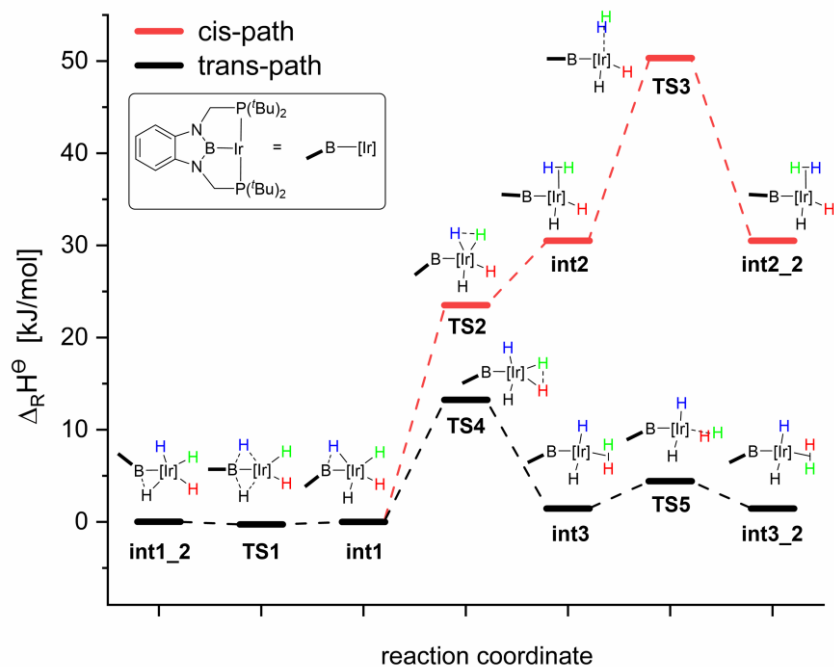

**Figure S 53.** Plot of the calculated reaction enthalpies for the iridium polyhydride system **4** (B3LYP/GD3BJ/def2tzvp).

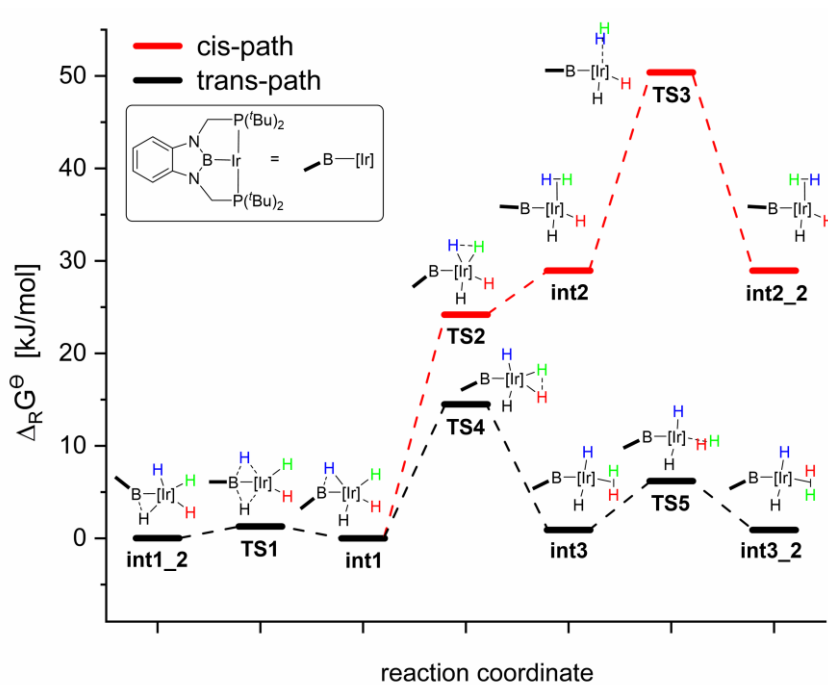

**Figure S 54.** Plot of the calculated Gibbs free reaction energies for the iridium polyhydride system **4** (B3LYP/GD3BJ/def2tzvp).

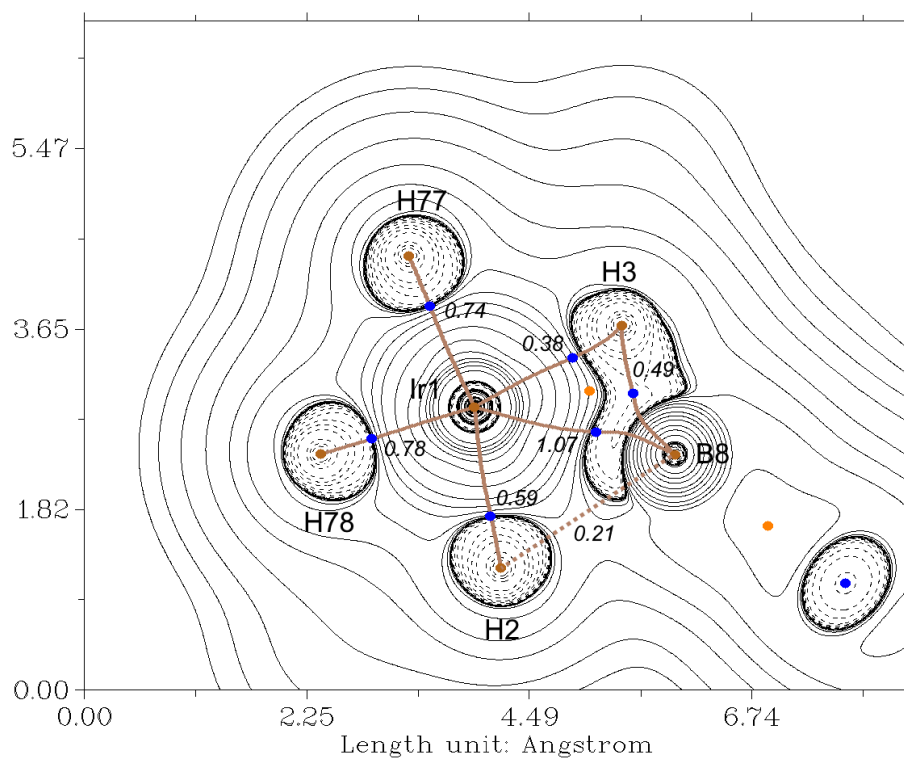

**Figure S 55.** Contour plot of the Laplacian of the electron density  $\nabla^2\rho$  of Ir complex **4** in the B-Ir-H plane of **int1** structure. Dashed lines indicate negative (local charge concentration), solid lines indicate positive values (local charge depletion). The Laplacian plot is overlaid with the molecular graph from QT-AIM analysis and wiberg bond indices (*italic small numbers*). Brown lines indicate bond paths, blue dots correspond to bond critical points, dashed brown lines are hypothetical bond path which were drawn manually in this graph. Density from B3LYP/GD3BJ/def2tzvp calculation.

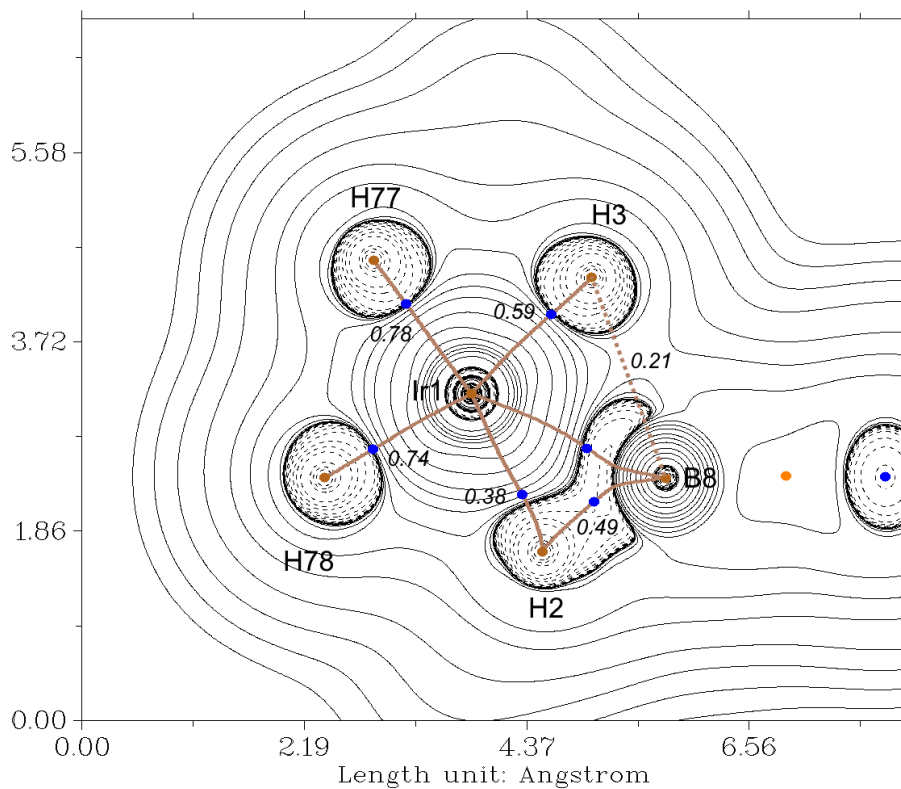

**Figure S 56.** Contour plot of the Laplacian of the electron density  $\nabla^2\rho$  of Ir complex **4** in the B-Ir-H plane of **int1\_2** structure. Dashed lines indicate negative (local charge concentration), solid lines indicate positive values (local charge depletion). The Laplacian plot is overlaid with the molecular graph from QTAIM analysis and wiberg bond indices (*italic small numbers*). Brown lines indicate bond paths, blue dots correspond to bond critical points, dashed brown lines are hypothetical bond path which were drawn manually in this graph. Density from B3LYP/GD3BJ/def2tzvp calculation.



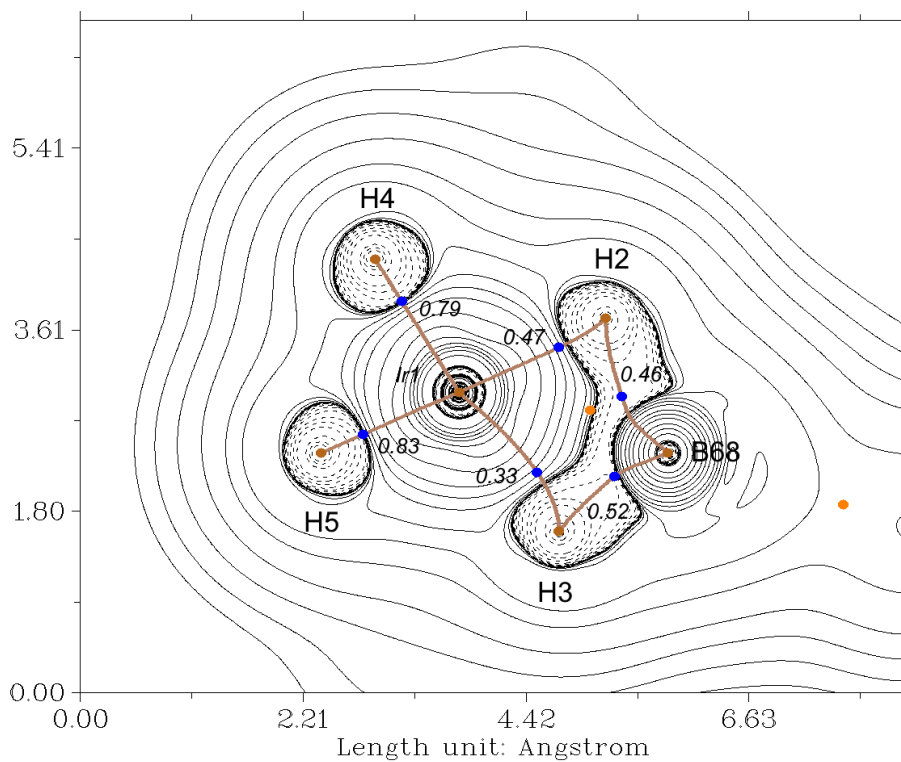

**Figure S 57.** Contour plot of the Laplacian of the electron density  $\nabla^2 r$  of Ir complex **A** in the B-Ir-H plane. Dashed lines indicate negative (local charge concentration), solid lines indicate positive values (local charge depletion). The Laplacian plot is overlaid with the molecular graph from QT-AIM analysis and wiberg bond indices (*italic small numbers*). Brown lines indicate bond paths, blue dots correspond to bond critical points. Density from B3LYP/GD3BJ/def2tzvp calculation.

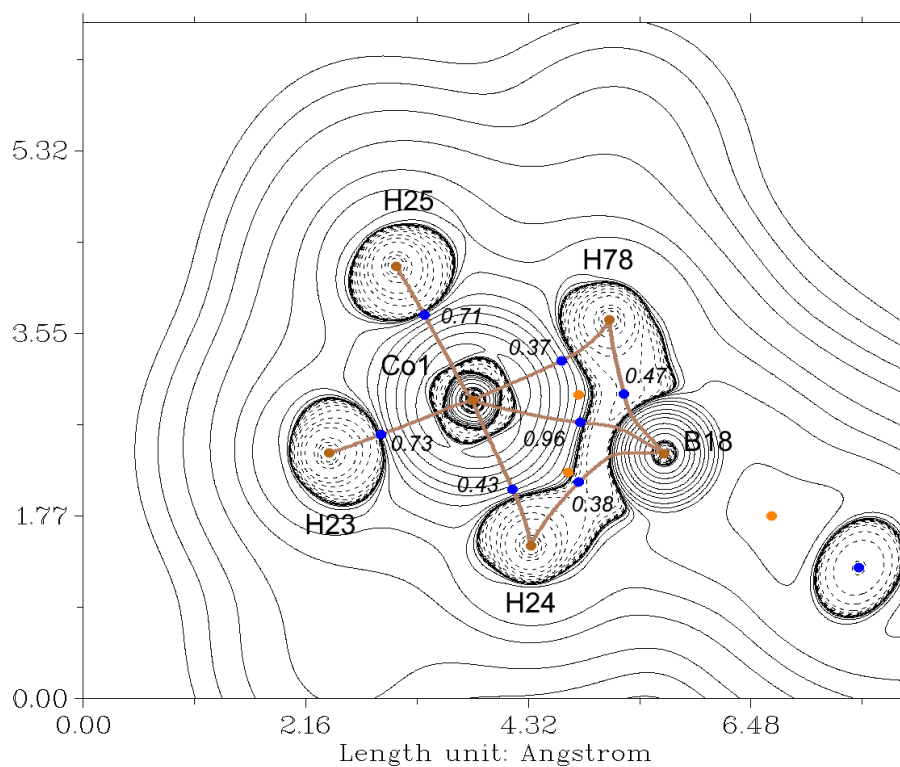

**Figure S 58.** Contour plot of the Laplacian of the electron density  $\nabla^2\rho$  of Ir complex **B** in the B-Ir-H plane. Dashed lines indicate negative (local charge concentration), solid lines indicate positive values (local charge depletion). The Laplacian plot is overlaid with the molecular graph from QT-AIM analysis and wiberg bond indices (italic small numbers). Brown lines indicate bond paths, blue dots correspond to bond critical points. Density from B3LYP/GD3BJ/def2tzvp calculation.

**Table S 9:** Summary of Natural Charge Analysis from NBO6.0<sup>27-30</sup> calculations of the literature known complex **B** and the here described complex **4**.

|                                         | Atom                 | Number | Nat Charge |          | Atom     | Number | Nat Charge |          |
|-----------------------------------------|----------------------|--------|------------|----------|----------|--------|------------|----------|
| M4 unit                                 | Co                   | 1      | -0.36171   |          | Ir       | 1      | -0.29141   |          |
|                                         | H                    | 23     | -0.07121   |          | H bridge | 75     | 0.03638    |          |
|                                         | H bridge             | 24     | 0.0082     |          | H        | 76     | -0.09196   |          |
|                                         | H                    | 25     | -0.12761   |          | H        | 77     | -0.08713   |          |
|                                         | H bridge             | 78     | 0.0393     |          | H        | 78     | -0.22703   |          |
|                                         | Sum                  |        | -0.51303   |          | Sum      |        | -0.66115   |          |
| 2 x CH <sub>2</sub> PF <sub>6</sub> Buz | P                    | 2      | 1.17859    |          | P        | 2      | 1.21259    |          |
|                                         | P                    | 3      | 1.17936    |          | P        | 3      | 1.21272    |          |
|                                         | C                    | 6      | -0.50462   |          | C        | 5      | -0.33039   |          |
|                                         | H                    | 7      | 0.20426    |          | C        | 6      | -0.60306   |          |
|                                         | H                    | 8      | 0.20161    |          | H        | 7      | 0.22677    |          |
|                                         | C                    | 9      | -0.50444   |          | H        | 8      | 0.19745    |          |
|                                         | H                    | 10     | 0.20161    |          | H        | 9      | 0.20631    |          |
|                                         | H                    | 11     | 0.20419    |          | C        | 10     | -0.60013   |          |
|                                         | C                    | 26     | -0.31054   |          | H        | 11     | 0.20143    |          |
|                                         | C                    | 27     | -0.61033   |          | H        | 12     | 0.20354    |          |
|                                         | H                    | 28     | 0.20432    |          | H        | 13     | 0.23351    |          |
|                                         | H                    | 29     | 0.2328     |          | C        | 14     | -0.33212   |          |
|                                         | H                    | 30     | 0.20381    |          | C        | 15     | -0.60339   |          |
|                                         | C                    | 31     | -0.60753   |          | H        | 16     | 0.20588    |          |
|                                         | H                    | 32     | 0.20826    |          | H        | 17     | 0.2243     |          |
|                                         | H                    | 33     | 0.20255    |          | H        | 18     | 0.20539    |          |
|                                         | H                    | 34     | 0.20668    |          | C        | 19     | -0.60828   |          |
|                                         | C                    | 35     | -0.6097    |          | H        | 20     | 0.20017    |          |
|                                         | H                    | 36     | 0.20616    |          | H        | 21     | 0.24002    |          |
|                                         | H                    | 37     | 0.199      |          | H        | 22     | 0.20066    |          |
|                                         | H                    | 38     | 0.2282     |          | C        | 23     | -0.59924   |          |
|                                         | C                    | 39     | -0.31064   |          | H        | 24     | 0.20831    |          |
|                                         | C                    | 40     | -0.60757   |          | H        | 25     | 0.19906    |          |
|                                         | H                    | 41     | 0.20826    |          | H        | 26     | 0.20001    |          |
|                                         | H                    | 42     | 0.20673    |          | C        | 27     | -0.52205   |          |
|                                         | H                    | 43     | 0.20257    |          | H        | 28     | 0.20194    |          |
|                                         | C                    | 44     | -0.61035   |          | H        | 29     | 0.20956    |          |
|                                         | H                    | 45     | 0.20431    |          | C        | 42     | -0.52204   |          |
|                                         | H                    | 46     | 0.20382    |          | H        | 43     | 0.20955    |          |
|                                         | H                    | 47     | 0.23287    |          | H        | 44     | 0.20194    |          |
|                                         | C                    | 48     | -0.60972   |          | C        | 45     | -0.33212   |          |
|                                         | H                    | 49     | 0.20618    |          | C        | 46     | -0.59923   |          |
|                                         | H                    | 50     | 0.22814    |          | H        | 47     | 0.2        |          |
|                                         | H                    | 51     | 0.199      |          | H        | 48     | 0.19906    |          |
|                                         | C                    | 52     | -0.31027   |          | H        | 49     | 0.20831    |          |
|                                         | C                    | 53     | -0.60596   |          | C        | 50     | -0.60339   |          |
|                                         | H                    | 54     | 0.20885    |          | H        | 51     | 0.20588    |          |
|                                         | H                    | 55     | 0.20128    |          | H        | 52     | 0.20539    |          |
|                                         | H                    | 56     | 0.20178    |          | H        | 53     | 0.2243     |          |
|                                         | C                    | 57     | -0.60964   |          | C        | 54     | -0.60827   |          |
|                                         | H                    | 58     | 0.2065     |          | H        | 55     | 0.20066    |          |
|                                         | H                    | 59     | 0.20747    |          | H        | 56     | 0.24001    |          |
|                                         | H                    | 60     | 0.22399    |          | H        | 57     | 0.20016    |          |
|                                         | C                    | 61     | -0.61259   |          | C        | 58     | -0.33038   |          |
|                                         | H                    | 62     | 0.20239    |          | C        | 59     | -0.60013   |          |
|                                         | H                    | 63     | 0.23682    |          | H        | 60     | 0.20142    |          |
|                                         | H                    | 64     | 0.20137    |          | H        | 61     | 0.2335     |          |
|                                         | C                    | 65     | -0.31066   |          | H        | 62     | 0.20353    |          |
|                                         | C                    | 66     | -0.61247   |          | C        | 63     | -0.60185   |          |
|                                         | H                    | 67     | 0.20237    |          | H        | 64     | 0.2078     |          |
|                                         | H                    | 68     | 0.20146    |          | H        | 65     | 0.20064    |          |
|                                         | H                    | 69     | 0.2367     |          | H        | 66     | 0.20609    |          |
|                                         | C                    | 70     | -0.6096    |          | C        | 67     | -0.60306   |          |
|                                         | H                    | 71     | 0.20651    |          | H        | 68     | 0.19745    |          |
|                                         | H                    | 72     | 0.224      |          | H        | 69     | 0.22677    |          |
|                                         | H                    | 73     | 0.20747    |          | H        | 70     | 0.20631    |          |
|                                         | C                    | 74     | -0.60601   |          | C        | 71     | -0.60185   |          |
|                                         | H                    | 75     | 0.20888    |          | H        | 72     | 0.2061     |          |
|                                         | H                    | 76     | 0.20179    |          | H        | 73     | 0.20064    |          |
|                                         | H                    | 77     | 0.20131    |          | H        | 74     | 0.2078     |          |
|                                         |                      | Sum    |            | 1.17158  |          | Sum    |            | 1.18195  |
|                                         | Benzodiazaboryl unit | N      | 4          | -0.64716 |          | N      | 4          | -0.65544 |
|                                         |                      | N      | 5          | -0.64702 |          | N      | 30         | -0.65545 |
|                                         |                      | B      | 18         | 0.4943   |          | B      | 31         | 0.63886  |
|                                         |                      | C      | 12         | 0.14538  |          | C      | 32         | 0.13935  |
|                                         |                      | C      | 13         | -0.26013 |          | C      | 33         | 0.13934  |
|                                         |                      | H      | 14         | 0.20716  |          | C      | 34         | -0.25253 |
|                                         |                      | C      | 15         | 0.14542  |          | H      | 35         | 0.20646  |
|                                         |                      | C      | 16         | -0.22648 |          | C      | 36         | -0.22163 |
|                                         |                      | H      | 17         | 0.20471  |          | H      | 37         | 0.20397  |
|                                         |                      | C      | 19         | -0.22647 |          | C      | 38         | -0.22162 |
|                                         |                      | H      | 20         | 0.20472  |          | H      | 39         | 0.20397  |
|                                         |                      | C      | 21         | -0.2601  |          | C      | 40         | -0.25253 |
|                                         | H                    | 22     | 0.20715    |          | H        | 41     | 0.20646    |          |
|                                         |                      | Sum    |            | -0.65852 |          | Sum    |            | -0.52079 |

## 6 Literature

1. Y. Segawa, M. Yamashita and K. Nozaki, *J. Am. Chem. Soc.*, 2009, **131**, 9201-9203.
2. G. M. Sheldrick, *Acta Cryst. A*, 2015, **71**, 3-8.
3. G. M. Sheldrick, *SHELXL 97, Program for the Solution of Crystal Structures*, University of Göttingen, 1990.
4. G. M. Sheldrick, *Acta Cryst. C*, 2015, **71**, 3-8.
5. G. Sheldrick, *SADABS Version 2*, University of Göttingen, 2014.
6. G. Sheldrick, *TWINABS*, University of Göttingen, 2008.
7. P. M. N. Đỗ, N. G. Akhmedov, J. L. Petersen, B. S. Dolinar and C. Milsman, *Chem. Commun.*, 2020, **56**, 5397-5400.
8. T. Beweries, J. Thomas, M. Klahn, A. Schulz, D. Heller and U. Rosenthal, *ChemCatChem*, 2011, **3**, 1865-1868.
9. M. J. Frisch, G. W. Trucks, H. B. Schlegel, G. E. Scuseria, M. A. Robb, J. R. Cheeseman, G. Scalmani, V. Barone, G. A. Petersson, H. Nakatsuji, X. Li, M. Caricato, A. V. Marenich, J. Bloino, B. G. Janesko, R. Gomperts, B. Mennucci, H. P. Hratchian, J. V. Ortiz, A. F. Izmaylov, J. L. Sonnenberg, Williams, F. Ding, F. Lipparini, F. Egidi, J. Goings, B. Peng, A. Petrone, T. Henderson, D. Ranasinghe, V. G. Zakrzewski, J. Gao, N. Rega, G. Zheng, W. Liang, M. Hada, M. Ehara, K. Toyota, R. Fukuda, J. Hasegawa, M. Ishida, T. Nakajima, Y. Honda, O. Kitao, H. Nakai, T. Vreven, K. Throssell, J. A. Montgomery Jr., J. E. Peralta, F. Ogliaro, M. J. Bearpark, J. J. Heyd, E. N. Brothers, K. N. Kudin, V. N. Staroverov, T. A. Keith, R. Kobayashi, J. Normand, K. Raghavachari, A. P. Rendell, J. C. Burant, S. S. Iyengar, J. Tomasi, M. Cossi, J. M. Millam, M. Klene, C. Adamo, R. Cammi, J. W. Ochterski, R. L. Martin, K. Morokuma, O. Farkas, J. B. Foresman and D. J. Fox, *Journal*, 2016.
10. S. H. Vosko, L. Wilk and M. Nusair, *Can. J. Phys.*, 1980, **58**, 1200-1211.
11. J. P. Perdew, *Phys. Rev. B*, 1986, **33**, 8822-8824.
12. A. D. Becke, *Phys. Rev. A*, 1988, **38**, 3098-3100.
13. A. D. Becke, *J. Chem. Phys.*, 1993, **98**, 5648-5652.
14. C. Lee, W. Yang and R. G. Parr, *Phys. Rev. B*, 1988, **37**, 785-789.
15. B. Miehlich, A. Savin, H. Stoll and H. Preuss, *Chem. Phys. Lett.*, 1989, **157**, 200-206.
16. F. Weigend and R. Ahlrichs, *Phys. Chem. Chem. Phys.*, 2005, **7**, 3297-3305.
17. S. Grimme, J. Antony, S. Ehrlich and H. Krieg, *J. Chem. Phys.*, 2010, **132**, 154104.
18. S. Grimme, S. Ehrlich and L. Goerigk, *J. Comput. Chem.*, 2011, **32**, 1456-1465.
19. R. F. W. Bader, *Chem. Rev.*, 1991, **91**, 893-928.
20. F. Richard and R. Bader, *Atoms in Molecules: A Quantum Theory*, Oxford University Press, 1990.
21. T. Lu and F. Chen, *J. Comput. Chem.*, 2012, **33**, 580-592.
22. D. Roy, T. A. Keith and J. M. Millam, *GaussView, Version 6.1*, Shawnee Mission, KS, 2016.
23. Avogadro, *an open-source molecular builder and visualization tool*, Version 1.6, Retrieved from <http://avogadro.cc/>.
24. M. D. Hanwell, D. E. Curtis, D. C. Lonie, T. Vandermeersch, E. Zurek and G. R. Hutchison, *Journal of Cheminformatics*, 2012, **4**, 17.
25. Mercury, Retrieved from <http://www.ccdc.cam.ac.uk/mercury/>.
26. T. J. Hebden, K. I. Goldberg, D. M. Heinekey, X. Zhang, T. J. Emge, A. S. Goldman and K. Krogh-Jespersen, *Inorg. Chem.*, 2010, **49**, 1733-1742.
27. E. D. Glendening, C. R. Landis and F. Weinhold, *J. Comput. Chem.*, 2013, **34**, 1429-1437.
28. F. Weinhold and C. R. Landis, *Valency and Bonding: A Natural Bond Orbital Donor-Acceptor Perspective*, Cambridge University Press, Cambridge, 2005.
29. F. Weinhold and J. E. Carpenter, in *The Structure of Small Molecules and Ions*, eds. R. Naaman and Z. Vager, Springer US, Boston, MA, 1988, DOI: 10.1007/978-1-4684-7424-4\_24, pp. 227-236.
30. J. E. Carpenter and F. Weinhold, *J. Mol. Struct.: THEOCHEM*, 1988, **169**, 41-62.
